# Supplementary material for: Loss of cytoplasmic incompatibility in Wolbachia-infected Aedes aegypti under field conditions
Source: PLoS Negl Trop Dis. 2019 Apr 19;13(4):e0007357. doi: 10.1371/journal.pntd.0007357 (PMC6493766; doi:10.1371/journal.pntd.0007357)
Supplement: S1 Data — (XLSX) [file pntd.0007357.s001.xlsx]

## Sheet: Figure 1A and S1
Date and time	99% shade (bucket)	50% shade (bucket)	99% shade (pot)	50% shade (pot)	99% shade (cup)	50% shade (cup)	Direct sunlight (bucket)
2018-01-10 16:40:00	29.864	34.3	30.4715	35.219	30.907	33.405	37.5
2018-01-10 17:10:00	29.864	34.1957	30.409	34.564	30.5945	32.75	36.5
2018-01-10 17:40:00	29.5515	33.8	30.003	33.7535	30.4385	31.813	35.5
2018-01-10 18:10:00	29.4895	33.6957	29.847	33.036	30.0015	31.251	34.5
2018-01-10 18:40:00	29.1455	33.2583	29.378	32.0375	29.4705	30.7205	34
2018-01-10 19:10:00	29.021	32.7793	28.8785	31.257	28.877	29.815	33
2018-01-10 19:40:00	28.615	32.2797	28.3475	30.258	28.2525	29.128	32
2018-01-10 20:10:00	28.1775	31.6133	27.816	29.509	27.3775	28.253	31.5
2018-01-10 20:40:00	28.0215	31.1133	27.3165	28.8535	26.8465	27.691	30.5
2018-01-10 21:10:00	27.584	30.6137	26.8165	27.9475	26.253	27.1285	30
2018-01-10 21:40:00	27.428	30.1347	26.3475	27.3855	26.034	26.9415	29.5
2018-01-10 22:10:00	27.022	29.6347	26.129	26.8855	25.628	26.504	29
2018-01-10 22:40:00	26.5845	29.1557	25.7225	26.6355	25.2215	26.0975	28.5
2018-01-10 23:10:00	26.4285	28.6767	25.285	26.198	25.0965	25.9415	28
2018-01-10 23:40:00	26.0535	28.2183	25.16	25.761	24.7215	25.5665	27.5
2018-01-11 00:10:00	25.9285	28.0933	24.785	25.6045	24.5965	25.4415	27
2018-01-11 00:40:00	25.5535	27.656	24.6915	25.261	24.5965	25.41	26.5
2018-01-11 01:10:00	25.4285	27.1977	24.5975	25.1045	24.253	25.035	26
2018-01-11 01:40:00	25.3035	26.927	24.2225	24.7295	24.128	24.91	26
2018-01-11 02:10:00	24.9285	26.656	24.129	24.636	24.0655	24.5665	25.5
2018-01-11 02:40:00	24.8035	26.2187	24.035	24.261	23.7215	24.4725	25
2018-01-11 03:10:00	24.46	26.1147	23.7225	24.1985	23.659	24.379	25
2018-01-11 03:40:00	24.366	25.698	23.66	24.1045	23.628	24.0665	24.5
2018-01-11 04:10:00	24.2725	25.6147	23.5975	24.042	23.5965	24.035	24.5
2018-01-11 04:40:00	24.21	25.3853	23.5975	24.011	23.659	24.035	24
2018-01-11 05:10:00	24.1475	25.1563	23.5665	23.7295	23.659	24.035	24
2018-01-11 05:40:00	23.866	25.0937	23.5665	23.7295	23.659	24.035	24
2018-01-11 06:10:00	23.8035	25.052	23.535	23.6985	23.6905	24.004	24
2018-01-11 06:40:00	23.7725	24.6563	23.535	23.667	23.6905	23.9725	24
2018-01-11 07:10:00	23.71	24.6147	23.504	23.6355	23.5965	23.91	23.5
2018-01-11 07:40:00	23.6475	24.552	23.2225	23.6045	23.5655	23.879	23.5
2018-01-11 08:10:00	23.6475	24.5313	23.504	23.6355	23.659	23.9415	23.5
2018-01-11 08:40:00	23.6475	24.6147	23.7225	24.1985	24.2215	24.754	24
2018-01-11 09:10:00	23.6785	24.6563	24.129	24.6985	24.784	25.3165	24.5
2018-01-11 09:40:00	23.71	24.8437	24.16	24.8545	24.784	25.3475	24.5
2018-01-11 10:10:00	23.991	25.1147	24.5665	25.6985	25.159	26.0975	25.5
2018-01-11 10:40:00	24.116	25.8647	25.3165	27.198	26.3155	27.8475	27
2018-01-11 11:10:00	24.5535	26.6353	26.3165	28.791	27.596	29.378	28.5
2018-01-11 11:40:00	25.0535	27.5937	27.1915	29.8215	28.8455	30.5025	30
2018-01-11 12:10:00	25.5225	28.1143	27.7535	30.477	29.3765	30.502	31
2018-01-11 12:40:00	25.585	28.135	27.66	30.071	28.1895	29.534	30.5
2018-01-11 13:10:00	25.96	29.0307	27.7535	30.633	28.5335	30.721	31.5
2018-01-11 13:40:00	26.0535	29.26	27.8475	30.789	28.5645	30.127	31.5
2018-01-11 14:10:00	26.4595	29.968	28.2535	31.195	29.002	31.158	32.5
2018-01-11 14:40:00	26.897	30.218	28.41	31.4445	29.2515	31.0955	32.5
2018-01-11 15:10:00	26.897	30.2597	27.941	30.976	28.377	30.377	32.5
2018-01-11 15:40:00	26.9285	30.697	27.91	31.0695	28.346	31.252	33
2018-01-11 16:10:00	26.991	30.7387	27.9725	31.1945	28.502	30.8455	33
2018-01-11 16:40:00	27.022	30.926	27.941	30.695	28.377	30.346	32.5
2018-01-11 17:10:00	27.0845	30.947	27.9725	30.57	28.471	30.0335	32.5
2018-01-11 17:40:00	27.1155	30.7593	27.8785	30.258	28.065	29.5025	32
2018-01-11 18:10:00	27.1155	30.7177	27.785	29.821	27.971	29.409	32
2018-01-11 18:40:00	27.147	30.6763	27.7535	29.665	27.971	29.3465	31.5
2018-01-11 19:10:00	27.147	30.2803	27.691	29.509	27.94	29.003	31.5
2018-01-11 19:40:00	27.0845	30.0303	27.3165	28.978	27.409	28.472	31
2018-01-11 20:10:00	26.741	29.739	26.879	28.385	26.815	27.941	30
2018-01-11 20:40:00	26.647	29.2807	26.379	27.76	26.159	27.066	29.5
2018-01-11 21:10:00	26.272	28.8223	26.16	27.1665	25.628	26.504	29
2018-01-11 21:40:00	26.1475	28.51	25.66	26.6045	25.0965	26.004	28.5
2018-01-11 22:10:00	25.741	28.0517	25.2225	26.1045	24.659	25.535	27.5
2018-01-11 22:40:00	25.366	27.5937	24.785	25.6045	24.2215	25.0975	27
2018-01-11 23:10:00	25.241	27.1353	24.5975	25.167	24.0965	24.9415	26.5
2018-01-11 23:40:00	24.866	26.8643	24.1915	24.7295	23.7215	24.5665	26
2018-01-12 00:10:00	24.741	26.5727	24.0665	24.5735	23.628	24.4415	26
2018-01-12 00:40:00	24.6475	26.1563	23.7225	24.2295	23.628	24.41	25.5
2018-01-12 01:10:00	24.3035	26.073	23.66	24.136	23.5965	24.379	25
2018-01-12 01:40:00	24.241	25.6563	23.629	24.1045	23.628	24.3475	25
2018-01-12 02:10:00	24.1785	25.573	23.5975	24.042	23.659	24.3165	24.5
2018-01-12 02:40:00	24.116	25.5103	23.629	24.042	24.003	24.3475	24.5
2018-01-12 03:10:00	24.085	25.1353	23.66	24.042	24.0965	24.3475	24.5
2018-01-12 03:40:00	23.7725	25.073	23.629	24.042	23.753	24.0665	24
2018-01-12 04:10:00	23.71	25.0103	23.5975	23.7295	23.659	24.004	24
2018-01-12 04:40:00	23.6785	24.6353	23.535	23.6985	23.5965	23.9415	24
2018-01-12 05:10:00	23.616	24.573	23.2225	23.6355	23.2215	23.629	23.5
2018-01-12 05:40:00	23.3035	24.5103	23.16	23.573	23.1275	23.535	23.5
2018-01-12 06:10:00	23.241	24.1147	23.129	23.5105	23.0965	23.4725	23.5
2018-01-12 06:40:00	23.1785	24.073	23.0665	23.198	23.0965	23.4415	23
2018-01-12 07:10:00	23.116	24.0103	23.035	23.167	23.0025	23.129	23
2018-01-12 07:40:00	23.085	23.9897	22.7535	23.1355	23.034	23.379	23
2018-01-12 08:10:00	23.0535	23.9897	23.035	23.167	23.1275	23.4415	23
2018-01-12 08:40:00	23.116	24.177	23.504	23.7295	24.0965	24.379	23.5
2018-01-12 09:10:00	23.46	24.7603	24.16	24.761	24.9405	25.9725	25
2018-01-12 09:40:00	23.616	24.9687	24.754	25.5735	26.0655	27.2225	26
2018-01-12 10:10:00	24.0225	25.8647	25.629	26.8855	26.7215	28.066	27.5
2018-01-12 10:40:00	24.46	26.406	26.3165	28.1665	27.815	29.284	28.5
2018-01-12 11:10:00	24.96	27.1143	27.1915	29.2595	28.8145	29.9085	29.5
2018-01-12 11:40:00	25.4285	27.781	27.3785	29.884	28.9705	30.2525	30.5
2018-01-12 12:10:00	25.866	28.2807	27.7535	29.9775	29.2205	30.1275	31
2018-01-12 12:40:00	26.3975	29.0723	28.316	31.1325	29.97	31.72	32
2018-01-12 13:10:00	26.491	29.5303	28.285	31.1325	29.158	31.0955	32
2018-01-12 13:40:00	26.9595	30.53	28.7845	32.443	30.095	32.9375	33.5
2018-01-12 14:10:00	27.428	31.3007	29.191	33.005	30.4385	33.3435	34
2018-01-12 14:40:00	27.928	32.0087	29.347	33.629	30.626	33.6865	35
2018-01-12 15:10:00	28.334	32.446	29.316	33.442	30.126	32.781	35
2018-01-12 15:40:00	28.3965	32.467	29.222	32.9115	30.0015	32.188	34.5
2018-01-12 16:10:00	28.459	32.446	29.1285	32.3495	29.845	31.876	34.5
2018-01-12 16:40:00	28.5215	32.5087	29.1595	32.3185	29.97	31.7195	34.5
2018-01-12 17:10:00	28.5215	32.4047	28.7845	31.663	29.4705	30.7515	34
2018-01-12 17:40:00	28.49	31.9673	28.66	31.1015	29.033	30.221	33.5
2018-01-12 18:10:00	28.459	31.6757	28.285	30.5395	28.846	29.721	33
2018-01-12 18:40:00	28.3965	31.384	28.1285	29.946	28.4085	29.19	32
2018-01-12 19:10:00	28.084	31.0927	27.7535	29.4465	27.971	28.9715	31.5
2018-01-12 19:40:00	27.9905	30.6343	27.5975	28.8845	27.7525	28.472	31
2018-01-12 20:10:00	27.897	30.1553	27.1915	28.3535	27.284	27.972	30.5
2018-01-12 20:40:00	27.522	29.6557	26.754	27.8225	26.753	27.441	29.5
2018-01-12 21:10:00	27.397	29.1557	26.535	27.2605	26.128	26.629	29
2018-01-12 21:40:00	26.991	28.6557	26.035	26.667	25.3155	26.035	28.5
2018-01-12 22:10:00	26.5845	28.156	25.535	26.1355	24.784	25.535	27.5
2018-01-12 22:40:00	26.4285	27.8227	25.0665	25.636	24.534	25.035	27
2018-01-12 23:10:00	26.0225	27.3437	24.629	25.136	24.0965	24.5975	26.5
2018-01-12 23:40:00	25.616	26.8643	24.4415	24.6985	23.6905	24.41	26
2018-01-13 00:10:00	25.46	26.552	24.035	24.261	23.5655	24.004	25.5
2018-01-13 00:40:00	25.085	26.0937	23.66	24.0735	23.19	23.879	25
2018-01-13 01:10:00	24.9285	25.802	23.535	23.6985	23.0965	23.535	24.5
2018-01-13 01:40:00	24.5535	25.3647	23.41	23.573	23.034	23.4415	24
2018-01-13 02:10:00	24.46	25.073	23.0665	23.198	22.69	23.0975	24
2018-01-13 02:40:00	24.085	24.802	22.9725	23.073	22.6275	22.9725	23.5
2018-01-13 03:10:00	23.991	24.5313	22.66	22.7295	22.565	22.91	23.5
2018-01-13 03:40:00	23.866	24.2813	22.566	22.6665	22.5025	22.5975	23
2018-01-13 04:10:00	23.5225	24.0313	22.5035	22.573	22.221	22.4725	22.5
2018-01-13 04:40:00	23.4285	23.7603	22.41	22.229	22.1275	22.1285	22.5
2018-01-13 05:10:00	23.085	23.5103	22.0975	22.1355	22.065	22.0345	22
2018-01-13 05:40:00	23.0225	23.2813	22.066	22.0725	22.0335	22.0035	22
2018-01-13 06:10:00	22.9285	23.0313	22.0035	22.01	22.0335	21.972	22
2018-01-13 06:40:00	22.616	22.802	21.9725	21.6975	22.0025	21.9095	21.5
2018-01-13 07:10:00	22.5535	22.7397	21.941	21.6665	21.721	21.8785	21.5
2018-01-13 07:40:00	22.491	22.5313	21.6595	21.635	21.721	21.8785	21.5
2018-01-13 08:10:00	22.491	22.7397	22.0035	22.01	22.221	22.3475	21.5
2018-01-13 08:40:00	22.522	23.0103	22.4725	22.6355	23.2215	23.6915	22
2018-01-13 09:10:00	22.866	23.6563	23.0975	23.761	24.4405	25.91	24
2018-01-13 09:40:00	23.3035	24.5313	24.0975	25.011	26.034	28.1285	25.5
2018-01-13 10:10:00	23.835	25.3853	25.254	27.0105	27.7525	29.659	27.5
2018-01-13 10:40:00	24.3975	26.5937	26.5975	29.1035	29.095	31.283	29.5
2018-01-13 11:10:00	24.96	27.4057	27.3475	30.29	30.126	32.032	31
2018-01-13 11:40:00	25.491	28.5723	28.16	31.102	30.532	32.7815	32.5
2018-01-13 12:10:00	26.366	30.03	29.191	32.912	31.656	34.7795	34
2018-01-13 12:40:00	26.9595	31.3007	29.753	34.16	31.9995	35.8405	35.5
2018-01-13 13:10:00	27.803	32.55	30.284	35.47	32.4365	36.776	37
2018-01-13 13:40:00	28.3655	33.5287	30.378	35.938	32.0615	36.651	38
2018-01-13 14:10:00	28.5525	33.9867	30.3465	35.532	31.781	35.746	38
2018-01-13 14:40:00	28.9585	34.1533	30.2215	34.8775	31.219	34.654	37.5
2018-01-13 15:10:00	29.0525	34.341	29.878	34.347	30.7505	34.1235	37.5
2018-01-13 15:40:00	29.427	34.903	29.9095	34.721	31.25	35.247	38.5
2018-01-13 16:10:00	29.4895	35.3197	29.878	34.471	31.188	35.4025	39
2018-01-13 16:40:00	29.521	35.382	29.7845	33.9715	30.782	34.4665	38.5
2018-01-13 17:10:00	29.521	34.9447	29.4095	33.379	30.5635	33.0615	37
2018-01-13 17:40:00	29.4895	34.6117	29.2845	32.63	30.126	32.344	36
2018-01-13 18:10:00	29.177	34.112	28.8785	31.944	29.6265	31.6885	35
2018-01-13 18:40:00	29.115	33.5913	28.722	31.257	29.0645	30.814	34
2018-01-13 19:10:00	28.99	33.05	28.2535	30.5705	28.471	30.1585	33
2018-01-13 19:40:00	28.6465	32.342	27.816	29.915	27.9085	29.534	32
2018-01-13 20:10:00	28.49	31.8007	27.3475	29.0095	27.284	28.6595	31.5
2018-01-13 20:40:00	28.1155	31.259	27.129	28.416	26.784	28.066	30.5
2018-01-13 21:10:00	27.9905	30.7383	26.6915	27.885	26.5655	27.5975	30
2018-01-13 21:40:00	27.5845	30.197	26.254	27.323	26.0655	27.035	29
2018-01-13 22:10:00	27.147	29.489	26.035	26.7605	25.253	26.1915	28.5
2018-01-13 22:40:00	26.9595	28.9473	25.535	26.198	24.7215	25.66	28
2018-01-13 23:10:00	26.5535	28.4267	25.0665	25.667	24.503	25.16	27
2018-01-13 23:40:00	26.116	27.9267	24.629	25.1985	24.0655	24.9415	26.5
2018-01-14 00:10:00	25.96	27.406	24.4415	24.7295	23.659	24.504	26
2018-01-14 00:40:00	25.5535	26.927	24.035	24.542	23.534	24.0975	25.5
2018-01-14 01:10:00	25.3975	26.427	23.66	24.1045	23.159	23.9415	25
2018-01-14 01:40:00	24.991	26.1147	23.504	23.6985	23.065	23.5665	24.5
2018-01-14 02:10:00	24.6475	25.823	23.16	23.542	22.9715	23.4415	24
2018-01-14 02:40:00	24.491	25.3437	23.035	23.167	22.6275	23.0665	24
2018-01-14 03:10:00	24.116	24.8853	22.941	23.042	22.5335	22.941	23.5
2018-01-14 03:40:00	23.991	24.5937	22.566	22.6355	22.44	22.566	23
2018-01-14 04:10:00	23.866	24.323	22.5035	22.5415	22.1275	22.4725	22.5
2018-01-14 04:40:00	23.5225	24.0313	22.41	22.1665	22.0335	22.0975	22.5
2018-01-14 05:10:00	23.3975	23.7603	22.066	22.0415	21.971	21.972	22
2018-01-14 05:40:00	23.0535	23.323	21.9725	21.6975	21.6585	21.9095	22
2018-01-14 06:10:00	22.96	23.052	21.9095	21.5725	21.596	21.566	21.5
2018-01-14 06:40:00	22.616	22.802	21.597	21.4785	21.5335	21.472	21.5
2018-01-14 07:10:00	22.522	22.7187	21.5345	21.135	21.471	21.378	21
2018-01-14 07:40:00	22.4285	22.4897	21.472	21.1035	21.471	21.4095	21
2018-01-14 08:10:00	22.397	22.5103	21.5035	21.4475	21.6895	21.816	21
2018-01-14 08:40:00	22.4285	22.7397	21.9725	21.979	22.659	22.8785	21.5
2018-01-14 09:10:00	22.491	23.3647	22.535	22.7295	23.8155	25.004	23
2018-01-14 09:40:00	22.9285	24.0937	23.535	24.1045	25.1905	27.2225	24.5
2018-01-14 10:10:00	23.3975	25.1563	24.629	25.8235	26.909	28.7845	26.5
2018-01-14 10:40:00	23.96	26.3853	25.754	28.1665	28.6265	30.783	29
2018-01-14 11:10:00	24.7725	27.5307	26.8165	29.8845	29.938	32.7815	31
2018-01-14 11:40:00	25.335	29.0303	27.91	31.7265	31.156	34.3735	33.5
2018-01-14 12:10:00	25.8975	30.4883	28.847	33.381	31.749	35.4345	35
2018-01-14 12:40:00	26.772	31.9667	29.5345	34.7845	32.592	36.4955	36.5
2018-01-14 13:10:00	27.3345	33.216	30.378	36.032	32.9665	37.244	37.5
2018-01-14 13:40:00	27.897	34.632	30.909	37.217	33.4035	38.3355	38.5
2018-01-14 14:10:00	28.709	35.59	31.44	37.8095	33.8095	38.117	39.5
2018-01-14 14:40:00	29.1775	36.4853	31.877	38.121	33.8095	38.179	40.5
2018-01-14 15:10:00	29.646	37.339	32.002	38.2455	33.7785	37.68	41
2018-01-14 15:40:00	29.833	37.7763	32.033	37.964	33.3725	37.462	41
2018-01-14 16:10:00	30.208	37.9847	32.002	37.2775	33.1855	37.025	41.5
2018-01-14 16:40:00	30.3015	37.797	31.9395	36.654	32.5925	35.8075	40.5
2018-01-14 17:10:00	30.364	37.11	31.471	35.2815	31.8435	34.0605	39
2018-01-14 17:40:00	30.3955	36.5273	30.9715	34.3775	31.188	32.968	37.5
2018-01-14 18:10:00	30.333	35.7777	30.503	33.3475	30.5635	32.3125	36.5
2018-01-14 18:40:00	29.9895	35.028	30.003	32.568	29.97	31.6885	35.5
2018-01-14 19:10:00	29.8955	34.466	29.472	31.85	29.3145	30.783	34.5
2018-01-14 19:40:00	29.521	33.883	28.972	30.8825	28.6895	30.1895	33.5
2018-01-14 20:10:00	29.365	32.9667	28.441	30.196	27.846	29.534	32.5
2018-01-14 20:40:00	28.9275	32.1963	27.8475	29.228	27.1275	28.5345	31.5
2018-01-14 21:10:00	28.49	31.5923	27.254	28.541	26.253	27.5975	30.5
2018-01-14 21:40:00	28.053	30.6967	26.6915	27.885	25.7215	27.0035	30
2018-01-14 22:10:00	27.8655	30.1347	26.1915	27.073	25.534	26.5665	29
2018-01-14 22:40:00	27.428	29.593	25.9725	26.792	25.128	26.129	28.5
2018-01-14 23:10:00	27.022	29.0723	25.5665	26.292	25.034	25.4415	28
2018-01-14 23:40:00	26.866	28.5517	25.16	25.8235	24.628	25.254	27.5
2018-01-15 00:10:00	26.4595	28.0517	25.004	25.386	24.503	24.879	27
2018-01-15 00:40:00	26.0535	27.5727	24.5975	25.1985	24.159	24.535	26.5
2018-01-15 01:10:00	25.9285	27.0937	24.4725	24.8235	24.0655	24.41	26
2018-01-15 01:40:00	25.5535	26.802	24.16	24.6985	24.034	24.379	25.5
2018-01-15 02:10:00	25.4285	26.5103	24.0665	24.6045	24.003	24.379	25.5
2018-01-15 02:40:00	25.085	26.073	24.035	24.292	24.034	24.3475	25
2018-01-15 03:10:00	24.991	25.9897	24.004	24.2295	24.003	24.035	25
2018-01-15 03:40:00	24.9285	25.7397	23.9415	24.167	23.9715	24.004	24.5
2018-01-15 04:10:00	24.616	25.4897	23.9415	24.136	24.034	24.0665	24.5
2018-01-15 04:40:00	24.5535	25.2603	23.9415	24.1045	24.0655	24.0975	24.5
2018-01-15 05:10:00	24.491	25.0313	23.9415	24.1045	24.0655	24.0665	24
2018-01-15 05:40:00	24.46	24.9687	23.9415	24.0735	24.0655	24.035	24
2018-01-15 06:10:00	24.3975	24.927	23.6915	24.0735	24.034	24.004	24
2018-01-15 06:40:00	24.085	24.698	23.66	24.011	23.7215	23.879	24
2018-01-15 07:10:00	24.0535	24.4897	23.629	23.7295	23.659	23.8165	23.5
2018-01-15 07:40:00	23.991	24.448	23.5975	23.6985	23.6905	23.9725	23.5
2018-01-15 08:10:00	24.0225	24.4897	23.6915	24.0735	24.1905	24.629	23.5
2018-01-15 08:40:00	24.0535	24.927	24.129	24.636	24.878	26.535	24
2018-01-15 09:10:00	24.3975	25.427	24.7225	25.636	26.034	28.6585	25.5
2018-01-15 09:40:00	24.5535	26.3437	25.66	26.823	27.315	30.221	27.5
2018-01-15 10:10:00	25.0225	27.385	26.66	28.5725	28.939	31.095	29.5
2018-01-15 10:40:00	25.8035	28.3847	27.66	30.259	30.2195	30.7525	31
2018-01-15 11:10:00	26.366	29.53	28.66	31.82	31.6245	32.4075	33
2018-01-15 11:40:00	26.897	30.9463	29.378	33.2245	32.436	34.25	35
2018-01-15 12:10:00	27.4905	32.2167	30.284	34.9095	33.3725	35.872	37
2018-01-15 12:40:00	28.303	33.6327	30.9715	36.5625	34.028	37.526	38.5
2018-01-15 13:10:00	28.865	35.0693	31.8145	37.872	33.249	38.5855	39.5
2018-01-15 13:40:00	29.4895	36.0897	32.283	38.62	34.6215	38.834	40.5
2018-01-15 14:10:00	30.0205	37.2347	32.783	39.274	35.1205	39.426	41.5
2018-01-15 14:40:00	30.739	38.1717	32.97	39.835	35.3075	39.9875	42
2018-01-15 15:10:00	30.926	39.0253	33.095	39.9595	35.3075	39.862	42.5
2018-01-15 15:40:00	31.3635	39.442	33.095	39.554	34.715	39.0505	43
2018-01-15 16:10:00	31.488	39.442	33.0015	38.65	34.091	38.0525	43
2018-01-15 16:40:00	31.8005	39.2337	32.6265	37.621	33.8415	36.6175	42.5
2018-01-15 17:10:00	31.5195	38.2967	32.0955	36.218	32.5615	34.559	40.5
2018-01-15 17:40:00	31.4255	37.3183	31.471	34.815	31.344	32.9995	39
2018-01-15 18:10:00	31.051	36.4233	30.909	32.881	30.376	31.501	37.5
2018-01-15 18:40:00	30.895	35.4863	30.3465	31.9445	29.7515	31.0955	36
2018-01-15 19:10:00	30.52	34.9033	29.878	31.3515	29.283	30.5645	35
2018-01-15 19:40:00	30.3955	34.1953	29.4095	30.8205	29.096	30.096	34.5
2018-01-15 20:10:00	30.0205	33.654	29.222	30.29	28.6585	29.5965	33.5
2018-01-15 20:40:00	29.8955	33.1127	28.816	29.8525	28.565	29.4715	32.5
2018-01-15 21:10:00	29.552	32.6127	28.691	29.6655	28.471	29.0965	32
2018-01-15 21:40:00	29.427	32.113	28.3475	29.2595	28.096	28.9715	31.5
2018-01-15 22:10:00	29.0525	31.6133	28.2225	29.072	28.0025	28.5655	31
2018-01-15 22:40:00	28.9585	31.1343	28.0975	28.666	27.6275	28.4405	30.5
2018-01-15 23:10:00	28.615	30.6553	27.7535	28.541	27.534	28.097	30
2018-01-15 23:40:00	28.49	30.3637	27.66	28.1665	27.4715	28.0035	29.5
2018-01-16 00:10:00	28.1465	30.072	27.5665	28.0725	27.159	27.9095	29
2018-01-16 00:40:00	28.084	29.6347	27.254	27.729	27.159	27.5975	28.5
2018-01-16 01:10:00	27.9905	29.364	27.2225	27.6665	27.159	27.5975	28.5
2018-01-16 01:40:00	27.6155	29.0933	27.129	27.573	26.753	27.4725	28
2018-01-16 02:10:00	27.4905	28.635	26.7225	27.198	26.503	27.035	27.5
2018-01-16 02:40:00	27.0845	28.3643	26.5975	26.792	26.0655	26.5665	26.5
2018-01-16 03:10:00	26.6785	28.0517	26.16	26.3855	25.5965	26.0665	26
2018-01-16 03:40:00	26.491	27.5727	25.6915	25.8855	24.7215	25.16	25.5
2018-01-16 04:10:00	26.0225	27.0727	25.1915	25.386	24.1905	24.66	25
2018-01-16 04:40:00	25.585	26.5937	24.6915	25.136	24.034	24.4415	24.5
2018-01-16 05:10:00	25.46	26.302	24.285	24.6985	23.6905	24.0975	24
2018-01-16 05:40:00	25.0535	26.0313	24.16	24.3235	23.628	24.035	24
2018-01-16 06:10:00	24.96	25.5937	23.8165	24.2295	23.5655	23.9725	23.5
2018-01-16 06:40:00	24.585	25.5103	23.7225	24.136	23.534	23.9415	23.5
2018-01-16 07:10:00	24.491	25.2603	23.66	23.792	23.4715	23.879	23.5
2018-01-16 07:40:00	24.3975	25.0313	23.5975	23.7295	23.44	23.879	23
2018-01-16 08:10:00	24.085	24.9897	23.5665	23.7295	23.5025	23.9415	23
2018-01-16 08:40:00	24.085	25.052	23.629	24.1045	24.034	24.4725	23.5
2018-01-16 09:10:00	24.1475	25.2397	24.0975	24.792	24.784	26.379	24.5
2018-01-16 09:40:00	24.46	25.7397	24.5975	25.417	25.409	27.0975	25.5
2018-01-16 10:10:00	24.616	26.302	25.2225	26.7605	26.815	28.5345	27
2018-01-16 10:40:00	25.335	27.0937	26.535	28.2285	28.4395	30.0965	28.5
2018-01-16 11:10:00	25.96	28.3643	27.535	29.9775	29.3765	28.597	30.5
2018-01-16 11:40:00	26.491	29.6763	28.3785	31.9445	30.1575	27.285	32
2018-01-16 12:10:00	27.0535	31.176	29.0035	32.9735	31.188	37.776	34
2018-01-16 12:40:00	27.6155	32.446	29.847	34.846	31.812	40.646	35.5
2018-01-16 13:10:00	28.459	33.883	30.4095	36.0625	32.5615	41.9565	37
2018-01-16 13:40:00	28.9585	34.4243	30.503	36.0315	32.062	39.898	37.5
2018-01-16 14:10:00	29.427	35.299	30.5655	36.125	32.062	39.929	38
2018-01-16 14:40:00	29.6455	35.8197	30.5965	36.3125	31.6875	40.46	38.5
2018-01-16 15:10:00	30.083	36.569	30.878	36.8435	32.1245	41.084	39
2018-01-16 15:40:00	30.1765	36.7773	30.659	36.6255	31.7185	38.8675	39
2018-01-16 16:10:00	30.2075	36.486	30.2215	35.346	31.063	36.4025	38.5
2018-01-16 16:40:00	30.1765	36.0277	30.128	34.441	30.907	35.373	37.5
2018-01-16 17:10:00	30.1455	35.7157	29.753	33.786	30.4385	34.0615	37
2018-01-16 17:40:00	30.0515	35.0077	29.597	32.912	29.783	32.875	36
2018-01-16 18:10:00	29.7395	34.5287	29.2535	32.319	29.7515	32.251	35.5
2018-01-16 18:40:00	29.6145	34.008	28.847	31.445	29.283	31.283	34.5
2018-01-16 19:10:00	29.2085	33.4667	28.691	30.852	28.846	30.377	33.5
2018-01-16 19:40:00	29.0525	32.738	28.2535	30.2275	28.315	29.159	33
2018-01-16 20:10:00	28.6465	32.009	27.785	29.353	27.846	28.222	32
2018-01-16 20:40:00	28.49	31.4677	27.3475	28.7595	27.3465	27.5975	31
2018-01-16 21:10:00	28.084	30.947	26.9415	28.2285	27.2215	27.1285	30.5
2018-01-16 21:40:00	27.709	30.4263	26.785	27.729	26.815	26.7225	29.5
2018-01-16 22:10:00	27.5845	29.9473	26.6915	27.5415	26.7215	26.5665	29
2018-01-16 22:40:00	27.4905	29.6347	26.3475	27.1355	26.628	26.2225	28.5
2018-01-16 23:10:00	27.1155	29.1767	26.285	27.0105	26.378	26.1915	28
2018-01-16 23:40:00	26.9595	28.6977	26.16	26.6045	26.2215	26.0975	27.5
2018-01-17 00:10:00	26.5535	28.1977	25.7225	26.167	25.378	25.5975	27
2018-01-17 00:40:00	26.1475	27.7393	25.285	25.7295	25.128	25.0975	26.5
2018-01-17 01:10:00	26.0225	27.427	25.16	25.542	24.753	24.6915	26.5
2018-01-17 01:40:00	25.6785	27.156	24.8165	25.167	24.659	24.629	26
2018-01-17 02:10:00	25.585	26.906	24.754	25.0735	24.6905	24.629	25.5
2018-01-17 02:40:00	25.491	26.6563	24.7225	25.042	24.6905	24.629	25.5
2018-01-17 03:10:00	25.1785	26.4063	24.6915	24.7295	24.6905	24.5975	25.5
2018-01-17 03:40:00	25.116	26.177	24.66	24.667	24.7215	24.5975	25
2018-01-17 04:10:00	25.0535	25.927	24.66	24.667	24.753	24.629	25
2018-01-17 04:40:00	24.96	25.6563	24.629	24.6045	24.6905	24.504	24.5
2018-01-17 05:10:00	24.6475	25.427	24.3165	24.5735	24.3465	24.4415	24
2018-01-17 05:40:00	24.5535	25.177	24.2225	24.2295	24.159	24.035	24
2018-01-17 06:10:00	24.1785	24.927	23.8475	24.1045	23.753	23.5975	23.5
2018-01-17 06:40:00	24.0535	24.6563	23.6915	23.7295	23.284	23.16	23
2018-01-17 07:10:00	23.6785	24.2187	23.285	23.573	22.8775	22.7225	22.5
2018-01-17 07:40:00	23.5535	24.1353	23.16	23.167	22.7215	22.535	22
2018-01-17 08:10:00	23.1785	23.7187	22.8165	23.042	22.659	22.4725	22
2018-01-17 08:40:00	23.085	23.6147	22.7225	22.6665	22.659	22.441	22
2018-01-17 09:10:00	23.0225	23.2187	22.66	22.604	22.659	22.441	21.5
2018-01-17 09:40:00	22.71	23.177	22.6285	22.573	22.69	22.441	21.5
2018-01-17 10:10:00	22.6475	23.1353	22.6285	22.5415	22.7525	22.5035	21.5
2018-01-17 10:40:00	22.6475	23.1147	22.66	22.5415	22.8775	22.566	22
2018-01-17 11:10:00	22.6475	22.9063	23.3165	22.573	23.3465	22.8475	21.5
2018-01-17 11:40:00	22.616	22.9063	23.2225	22.573	23.19	22.8785	22
2018-01-17 12:10:00	22.6475	23.1353	23.2225	23.886	23.3465	24.8165	22.5
2018-01-17 12:40:00	22.6785	23.573	23.535	24.386	23.784	25.4725	23
2018-01-17 13:10:00	23.0225	23.8437	23.629	25.0735	24.253	26.5975	24
2018-01-17 13:40:00	23.0535	24.1353	23.6915	25.698	24.284	26.816	24.5
2018-01-17 14:10:00	23.1475	24.6147	24.0665	26.448	24.409	27.6905	25
2018-01-17 14:40:00	23.46	25.052	24.129	26.604	24.753	27.6595	26
2018-01-17 15:10:00	23.585	25.6147	24.5665	27.822	25.3155	29.877	27
2018-01-17 15:40:00	23.96	26.0937	24.9725	28.322	25.4405	29.877	27.5
2018-01-17 16:10:00	24.0535	26.198	25.0665	28.2905	25.409	29.19	28
2018-01-17 16:40:00	24.4285	26.6353	25.4415	28.353	25.753	29.1275	28.5
2018-01-17 17:10:00	24.5225	26.677	25.504	28.1345	25.7215	28.097	28.5
2018-01-17 17:40:00	25.5535	26.573	26.3165	27.6035	26.503	28.0655	24.5

## Sheet: Figure 1B-C
Cross (female x male)	Hatch proportion
Uninfected x wMel (26°C)	0
Uninfected x wMel (26°C)	0
Uninfected x wMel (26°C)	0
Uninfected x wMel (26°C)	0
Uninfected x wMel (26°C)	0
Uninfected x wMel (26°C)	0
Uninfected x wMel (26°C)	0
Uninfected x wMel (26°C)	0
Uninfected x wMel (26°C)	0
Uninfected x wMel (26°C)	0
Uninfected x wMel (26°C)	0
Uninfected x wMel (26°C)	0
Uninfected x wMel (26°C)	0
Uninfected x wMel (26°C)	0
Uninfected x wMel (26°C)	0
Uninfected x wMel (99% shade)	0
Uninfected x wMel (99% shade)	0
Uninfected x wMel (99% shade)	0
Uninfected x wMel (99% shade)	0
Uninfected x wMel (99% shade)	0
Uninfected x wMel (99% shade)	0
Uninfected x wMel (99% shade)	0
Uninfected x wMel (99% shade)	0
Uninfected x wMel (99% shade)	0
Uninfected x wMel (99% shade)	0
Uninfected x wMel (99% shade)	0
Uninfected x wMel (99% shade)	0.0192308
Uninfected x wMel (99% shade)	0
Uninfected x wMel (99% shade)	0
Uninfected x wMel (99% shade)	0
Uninfected x wMel (99% shade)	0.0136986
Uninfected x wMel (99% shade)	0
Uninfected x wMel (99% shade)	0
wMel (99% shade) x Uninfected	0.925926
wMel (99% shade) x Uninfected	1
wMel (99% shade) x Uninfected	0.977528
wMel (99% shade) x Uninfected	0.957746
wMel (99% shade) x Uninfected	0.928571
wMel (99% shade) x Uninfected	0.964912
wMel (99% shade) x Uninfected	0.970588
wMel (99% shade) x Uninfected	0.974359
wMel (99% shade) x Uninfected	0.982759
wMel (99% shade) x Uninfected	0.964706
wMel (99% shade) x Uninfected	0.96875
wMel (99% shade) x Uninfected	0.927536
wMel (99% shade) x Uninfected	0.987952
wMel (99% shade) x Uninfected	0.97561
wMel (99% shade) x Uninfected	0.984375
wMel (99% shade) x Uninfected	0.960784
wMel (99% shade) x Uninfected	1
wMel (99% shade) x Uninfected	0.955224
wMel (99% shade) x wMel (26°C)	1
wMel (99% shade) x wMel (26°C)	1
wMel (99% shade) x wMel (26°C)	0.942029
wMel (99% shade) x wMel (26°C)	0.897727
wMel (99% shade) x wMel (26°C)	0.985294
wMel (99% shade) x wMel (26°C)	0.957143
wMel (99% shade) x wMel (26°C)	0.963855
wMel (99% shade) x wMel (26°C)	0.989691
wMel (99% shade) x wMel (26°C)	0.985915
wMel (99% shade) x wMel (26°C)	0.903846
wMel (99% shade) x wMel (26°C)	0.833333
wMel (99% shade) x wMel (26°C)	0.989899
wMel (99% shade) x wMel (26°C)	1
wMel (99% shade) x wMel (26°C)	0.857143
wMel (99% shade) x wMel (26°C)	0.940299
wMel (99% shade) x wMel (26°C)	0.935065
wMel (99% shade) x wMel (26°C)	0.943396
wMel (99% shade) x wMel (26°C)	0.987952
Uninfected x wMel (26°C)	0
Uninfected x wMel (26°C)	0
Uninfected x wMel (26°C)	0
Uninfected x wMel (26°C)	0
Uninfected x wMel (26°C)	0
Uninfected x wMel (26°C)	0
Uninfected x wMel (26°C)	0
Uninfected x wMel (26°C)	0
Uninfected x wMel (26°C)	0
Uninfected x wMel (26°C)	0
Uninfected x wMel (26°C)	0
Uninfected x wMel (26°C)	0
Uninfected x wMel (26°C)	0
Uninfected x wMel (26°C)	0
Uninfected x wMel (26°C)	0
Uninfected x wMel (50% shade)	0.405797
Uninfected x wMel (50% shade)	0
Uninfected x wMel (50% shade)	0.0208333
Uninfected x wMel (50% shade)	0
Uninfected x wMel (50% shade)	0
Uninfected x wMel (50% shade)	0
Uninfected x wMel (50% shade)	0.205128
Uninfected x wMel (50% shade)	0.0447761
Uninfected x wMel (50% shade)	0
Uninfected x wMel (50% shade)	0
Uninfected x wMel (50% shade)	0.037037
Uninfected x wMel (50% shade)	0.189873
Uninfected x wMel (50% shade)	0.164179
Uninfected x wMel (50% shade)	0.381579
Uninfected x wMel (50% shade)	0
Uninfected x wMel (50% shade)	0.206349
wMel (50% shade) x Uninfected	0.947368
wMel (50% shade) x Uninfected	0.476191
wMel (50% shade) x Uninfected	0.962963
wMel (50% shade) x Uninfected	0.931034
wMel (50% shade) x Uninfected	0.9
wMel (50% shade) x Uninfected	0.953846
wMel (50% shade) x Uninfected	0.967033
wMel (50% shade) x Uninfected	0.934211
wMel (50% shade) x Uninfected	0.954545
wMel (50% shade) x Uninfected	0.873016
wMel (50% shade) x Uninfected	0.963415
wMel (50% shade) x wMel (26°C)	0.382353
wMel (50% shade) x wMel (26°C)	0.619048
wMel (50% shade) x wMel (26°C)	0.7
wMel (50% shade) x wMel (26°C)	0.357143
wMel (50% shade) x wMel (26°C)	0.552239
wMel (50% shade) x wMel (26°C)	0.794118
wMel (50% shade) x wMel (26°C)	0.31746
wMel (50% shade) x wMel (26°C)	0.61194
wMel (50% shade) x wMel (26°C)	0.425
wMel (50% shade) x wMel (26°C)	0
wMel (50% shade) x wMel (26°C)	0.409091

## Sheet: Figure 2
Sex	Container type	Shade level	Wolbachia density (2^n ΔCp)
Female	Bucket	0.5	0.00379943
Female	Bucket	0.5	0.0230355
Female	Bucket	0.5	0.0128241
Female	Bucket	0.5	0.0236831
Female	Bucket	0.5	0.0109343
Female	Bucket	0.5	0.134437
Female	Bucket	0.5	0.00282997
Female	Bucket	0.5	0.0064343
Female	Bucket	0.5	0.00938778
Female	Bucket	0.5	0.00173602
Female	Bucket	0.5	0.0492067
Female	Bucket	0.5	0.0203335
Female	Bucket	0.5	0.0246034
Female	Bucket	0.5	0.210224
Female	Bucket	0.5	0.0810525
Female	Bucket	0.5	0.00925854
Female	Bucket	0.99	1.31951
Female	Bucket	0.99	2.69447
Female	Bucket	0.99	1.01045
Female	Bucket	0.99	3.00008
Female	Bucket	0.99	1.39474
Female	Bucket	0.99	1.60214
Female	Bucket	0.99	4.12673
Female	Bucket	0.99	2.97935
Female	Bucket	0.99	0.942785
Female	Bucket	0.99	3.69353
Female	Bucket	0.99	6.38639
Female	Bucket	0.99	0.363493
Female	Bucket	0.99	1.17283
Female	Bucket	0.99	1.5966
Female	Bucket	0.99	2.50533
Female	Bucket	0.99	2.22684
Female	Cup	0.5	0.00286947
Female	Cup	0.5	0.0146293
Female	Cup	0.5	0.00353273
Female	Cup	0.5	0.00373416
Female	Cup	0.5	0.00298098
Female	Cup	0.5	0.03983
Female	Cup	0.5	0.00377319
Female	Cup	0.5	0.00295014
Female	Cup	0.5	0.0172173
Female	Cup	0.5	0.060371
Female	Cup	0.5	0.00596195
Female	Cup	0.5	0.00293994
Female	Cup	0.5	0.00376013
Female	Cup	0.5	0.0218685
Female	Cup	0.5	0.00347204
Female	Cup	0.5	0.00414331
Female	Cup	0.99	2.41162
Female	Cup	0.99	2.21914
Female	Cup	0.99	2.50533
Female	Cup	0.99	1.93858
Female	Cup	0.99	0.35233
Female	Cup	0.99	0.933033
Female	Cup	0.99	0.685391
Female	Cup	0.99	0.989657
Female	Cup	0.99	1.1607
Female	Cup	0.99	1.97931
Female	Cup	0.99	1.6358
Female	Cup	0.99	0.907519
Female	Cup	0.99	3.2154
Female	Cup	0.99	1.6644
Female	Cup	0.99	3.5801
Female	Cup	0.99	2.11404
Female	Pot	0.5	0.00373416
Female	Pot	0.5	0.00365731
Female	Pot	0.5	0.00198727
Female	Pot	0.5	0.00428943
Female	Pot	0.5	0.0021299
Female	Pot	0.5	0.00273357
Female	Pot	0.5	0.00370837
Female	Pot	0.5	0.00666121
Female	Pot	0.5	0.00391981
Female	Pot	0.5	0.00615084
Female	Pot	0.5	0.00373416
Female	Pot	0.5	0.00573894
Female	Pot	0.5	0.00215216
Female	Pot	0.5	0.00386585
Female	Pot	0.5	0.00397453
Female	Pot	0.5	0.0211969
Female	Pot	0.99	2.23457
Female	Pot	0.99	1.84038
Female	Pot	0.99	1.06807
Female	Pot	0.99	1.60214
Female	Pot	0.99	1.93187
Female	Pot	0.99	2.25012
Female	Pot	0.99	0.815072
Female	Pot	0.99	2.0209
Female	Pot	0.99	1.12896
Female	Pot	0.99	1.53156
Female	Pot	0.99	1.97931
Female	Pot	0.99	3.45815
Female	Pot	0.99	2.00694
Female	Pot	0.99	0.744839
Female	Pot	0.99	1.00696
Female	Pot	0.99	0.466516
Male	Bucket	0.5	0.00792156
Male	Bucket	0.5	0.129857
Male	Bucket	0.5	0.0868699
Male	Bucket	0.5	0.0151977
Male	Bucket	0.5	0.286181
Male	Bucket	0.5	0.0478612
Male	Bucket	0.5	0.246558
Male	Bucket	0.5	0.0154099
Male	Bucket	0.5	0.167241
Male	Bucket	0.5	0.0217929
Male	Bucket	0.5	0.117034
Male	Bucket	0.5	0.0134151
Male	Bucket	0.5	0.18621
Male	Bucket	0.5	0.0601622
Male	Bucket	0.5	0.0473661
Male	Bucket	0.5	0.230047
Male	Bucket	0.99	0.359733
Male	Bucket	0.99	2.9897
Male	Bucket	0.99	1.64148
Male	Bucket	0.99	1.43893
Male	Bucket	0.99	3.91768
Male	Bucket	0.99	3.82378
Male	Bucket	0.99	1.38992
Male	Bucket	0.99	2.07053
Male	Bucket	0.99	1.10191
Male	Bucket	0.99	2.01391
Male	Bucket	0.99	1.30134
Male	Bucket	0.99	3.95863
Male	Bucket	0.99	2.83825
Male	Bucket	0.99	1.39959
Male	Bucket	0.99	0.477973
Male	Bucket	0.99	1.39959
Male	Cup	0.5	0.0830429
Male	Cup	0.5	0.356013
Male	Cup	0.5	0.0213444
Male	Cup	0.5	0.0242647
Male	Cup	0.5	0.164938
Male	Cup	0.5	0.346277
Male	Cup	0.5	0.0409498
Male	Cup	0.5	0.0308198
Male	Cup	0.5	0.0553605
Male	Cup	0.5	0.505226
Male	Cup	0.5	0.0877778
Male	Cup	0.5	0.176165
Male	Cup	0.5	0.046714
Male	Cup	0.5	0.0303955
Male	Cup	0.5	0.0437371
Male	Cup	0.5	0.795536
Male	Cup	0.99	1.75321
Male	Cup	0.99	0.49141
Male	Cup	0.99	0.50698
Male	Cup	0.99	1.8025
Male	Cup	0.99	0.870551
Male	Cup	0.99	1.03168
Male	Cup	0.99	0.923382
Male	Cup	0.99	1.19748
Male	Cup	0.99	2.41999
Male	Cup	0.99	1.54221
Male	Cup	0.99	1.09809
Male	Cup	0.99	1.49485
Male	Cup	0.99	1.82134
Male	Cup	0.99	1.37554
Male	Cup	0.99	3.55537
Male	Cup	0.99	1.6245
Male	Pot	0.5	0.0769465
Male	Pot	0.5	0.541488
Male	Pot	0.5	0.286181
Male	Pot	0.5	0.162668
Male	Pot	0.5	0.265172
Male	Pot	0.5	0.0683934
Male	Pot	0.5	0.362236
Male	Pot	0.5	0.712025
Male	Pot	0.5	0.576343
Male	Pot	0.5	0.178006
Male	Pot	0.5	0.179244
Male	Pot	0.5	0.205185
Male	Pot	0.5	0.41466
Male	Pot	0.5	0.309927
Male	Pot	0.5	0.0408081
Male	Pot	0.5	0.400535
Male	Pot	0.99	2.55797
Male	Pot	0.99	1.64718
Male	Pot	0.99	2.51403
Male	Pot	0.99	1.06807
Male	Pot	0.99	1.47939
Male	Pot	0.99	2.60268
Male	Pot	0.99	2.72263
Male	Pot	0.99	1.27015
Male	Pot	0.99	1.93858
Male	Pot	0.99	1.85961
Male	Pot	0.99	3.82378
Male	Pot	0.99	4.08405
Male	Pot	0.99	3.08442
Male	Pot	0.99	3.79737
Male	Pot	0.99	2.05623
Male	Pot	0.99	1.72309
Male	Laboratory	26C	2.43682
Male	Laboratory	26C	1.80876
Male	Laboratory	26C	2.62989
Male	Laboratory	26C	1.42899
Male	Laboratory	26C	1.48968
Male	Laboratory	26C	2.5403
Male	Laboratory	26C	0.843816
Male	Laboratory	26C	3.00008
Male	Laboratory	26C	1.29235
Male	Laboratory	26C	1.1019
Male	Laboratory	26C	4.50023
Male	Laboratory	26C	1.52098
Male	Laboratory	26C	2.02792
Male	Laboratory	26C	2.16595
Male	Laboratory	26C	1.51572
Male	Laboratory	26C	1.26576
Male	Laboratory	26C	1.94531
Female	Laboratory	26C	1.31039
Female	Laboratory	26C	0.537747
Female	Laboratory	26C	2.32947
Female	Laboratory	26C	0.598739
Female	Laboratory	26C	2.49666
Female	Laboratory	26C	2.17347
Female	Laboratory	26C	1.01045
Female	Laboratory	26C	1.87905
Female	Laboratory	26C	1.31494
Female	Laboratory	26C	0.837987
Female	Laboratory	26C	0.989657
Female	Laboratory	26C	5.93809
Female	Laboratory	26C	0.861546
Female	Laboratory	26C	3.00008
Female	Laboratory	26C	2.17347
Female	Laboratory	26C	0.664343
Female	Laboratory	26C	0.989657
Female	Laboratory	26C	3.18215

## Sheet: Figure 3A and S2
Date and time	Bucket (uncovered)	Takeaway (uncovered)	Bucket (garden bed)	Takeaway (garden bed)	Bucket (full shade)	Takeaway (full shade)	Experimental bucket (50% shade)	Experimental takeaway (50% shade)	Experimental bucket (99% shade)	Experimental takeaway (99% shade)
2018-01-19 16:41:01			26.008		26.389	25.695
2018-01-19 17:11:01	26	26.07	24.633		24.951	25.133	25.4687	24.8483	24.7103	23.799
2018-01-19 17:41:01	25.5	25.133	24.633		24.951	25.258	25.448	24.619	24.502	23.4237
2018-01-19 18:11:01	25.5	25.008	24.57		24.889	25.258	25.4063	24.39	24.4603	23.382
2018-01-19 18:41:01	25	24.883	24.445		24.889	25.258	25.0313	24.3483	24.4187	23.3403
2018-01-19 19:11:01	25	24.695	24.383		24.826	25.195	24.9687	23.9523	24.2103	23.2987
2018-01-19 19:41:01	25	24.57	24.383		24.826	25.195	24.927	23.89	24.002	23.1113
2018-01-19 20:11:01	24.5	24.508	24.32		24.764	25.133	24.5313	23.8273	23.9603	22.903
2018-01-19 20:41:01	24.5	24.445	24.32		24.764	25.07	24.4897	23.7857	23.9393	22.903
2018-01-19 21:11:01	24.5	24.383	24.32		24.701	25.07	24.448	23.4107	23.731	22.8613
2018-01-19 21:41:01	24.5	24.32	24.258		24.701	25.07	24.4063	23.39	23.5227	22.8197
2018-01-19 22:11:01	24	24.258	24.258		24.639	25.008	24.198	23.3483	23.481	22.7777
2018-01-19 22:41:01	24	24.195	24.258		24.639	25.008	23.9897	23.3273	23.4603	22.4237
2018-01-19 23:11:01	24	24.195	24.258		24.639	25.008	23.948	23.2857	23.4187	22.4027
2018-01-19 23:41:01	24	24.195	24.195		24.639	25.008	23.9063	23.0983	23.231	22.382
2018-01-20 00:11:01	24	24.195	24.195		24.576	25.008	23.8853	23.0773	23.0227	22.361
2018-01-20 00:41:01	24	24.195	24.07		24.576	24.945	23.677	22.89	23.002	22.361
2018-01-20 01:11:01	24	24.008	24.07		24.514	24.883	23.4897	22.869	22.981	22.361
2018-01-20 01:41:01	24	23.945	24.07		24.514	24.82	23.4687	22.869	22.9603	22.3403
2018-01-20 02:11:01	24	23.945	24.008		24.514	24.82	23.427	22.8483	22.9393	22.3193
2018-01-20 02:41:01	23.5	23.883	24.008		24.514	24.82	23.4063	22.8273	22.9187	22.3193
2018-01-20 03:11:01	23.5	23.883	23.945		24.451	24.758	23.3853	22.8067	22.731	22.3193
2018-01-20 03:41:01	23.5	23.695	23.883		24.389	24.695	23.177	22.7857	22.7103	22.2987
2018-01-20 04:11:01	23.5	23.57	23.82		24.326	24.633	22.9897	22.5773	22.5017	21.9027
2018-01-20 04:41:01	23.5	23.507	23.758		24.326	24.633	22.948	22.348	22.481	21.84
2018-01-20 05:11:01	23.5	23.382	23.695		24.264	24.57	22.9063	22.3063	22.4393	21.7777
2018-01-20 05:41:01	23	23.257	23.695		24.201	24.508	22.8647	22.119	22.4183	21.7777
2018-01-20 06:11:01	23	23.257	23.695		24.201	24.508	22.677	21.9107	22.21	21.4027
2018-01-20 06:41:01	23	23.257	23.695		24.139	24.508	22.4687	21.8897	22.1893	21.4027
2018-01-20 07:11:01	23	23.257	23.82		24.201	24.57	22.4687	22.2857	22.1893	21.7983
2018-01-20 07:41:01	23	23.507	24.008		24.264	24.695	22.823	22.7857	22.1893	21.9027
2018-01-20 08:11:01	23.5	23.945	24.195		24.326	24.82	22.9063	23.3067	22.231	22.5693
2018-01-20 08:41:01	23.5	24.508	24.445		24.451	25.008	23.323	23.8483	22.4393	22.882
2018-01-20 09:11:01	24	25.07	25.008		24.639	25.258	23.448	24.5567	22.6683	23.3403
2018-01-20 09:41:01	24.5	25.82	25.508		24.889	25.445	23.927	25.1607	22.9187	24.028
2018-01-20 10:11:01	25	26.383	26.32		25.201	25.758	24.6353	26.3897	23.1893	24.799
2018-01-20 10:41:01	25.5	27.07	26.57		25.451	25.883	25.3853	27.4727	23.6687	25.7573
2018-01-20 11:11:01	26	27.383	26.633		25.639	26.008	25.948	28.2643	24.1477	26.507
2018-01-20 11:41:01	26.5	27.757	27.008		25.889	26.07	26.3853	28.2643	24.4187	26.528
2018-01-20 12:11:01	27	28.319	26.945		26.076	26.133	26.5103	28.285	24.6687	26.5697
2018-01-20 12:41:01	27.5	28.007	26.883		26.139	26.195	26.9687	28.639	24.9187	26.757
2018-01-20 13:11:01	27.5	27.757	27.008		26.264	26.32	27.4477	28.9307	25.1687	26.8613
2018-01-20 13:41:01	28	27.945	27.07		26.389	26.383	27.906	28.9513	25.4187	26.9237
2018-01-20 14:11:01	28	27.945	27.133		26.451	26.383	28.031	29.1807	25.6687	27.132
2018-01-20 14:41:01	28.5	28.257	27.258		26.514	26.445	28.4893	29.4513	25.731	26.986
2018-01-20 15:11:01	28.5	28.382	27.32		26.576	26.508	28.9057	29.4513	25.9393	26.9653
2018-01-20 15:41:01	28.5	28.507	27.258		26.639	26.508	28.989	29.243	26.1687	26.9653
2018-01-20 16:11:01	28.5	28.569	27.133		26.576	26.383	29.0307	29.2013	26.21	26.9653
2018-01-20 16:41:01	28.5	28.132	27.07		26.576	26.32	29.0517	29.118	26.3977	26.9237
2018-01-20 17:11:01	28.5	27.945	26.945		26.576	26.258	29.0307	28.7017	26.4183	26.6737
2018-01-20 17:41:01	28.5	27.383	26.695		26.514	26.195	28.9683	28.181	26.4183	26.2363
2018-01-20 18:11:01	28	26.758	26.508		26.451	26.07	28.5517	27.6603	26.21	26.0903
2018-01-20 18:41:01	27.5	26.445	26.258		26.389	26.008	28.4477	27.1397	26.002	25.6323
2018-01-20 19:11:01	27	26.07	26.07		26.264	26.008	28.01	26.4523	25.9393	25.1323
2018-01-20 19:41:01	27	25.758	25.82		26.201	25.883	27.5727	25.9523	25.6893	24.653
2018-01-20 20:11:01	26.5	25.508	25.695		26.076	25.758	27.4687	25.6607	25.4603	24.3823
2018-01-20 20:41:01	26.5	25.32	25.57		25.951	25.695	27.031	25.3483	25.3977	23.9657
2018-01-20 21:11:01	26	25.133	25.445		25.889	25.695	26.927	24.9107	25.1687	23.8823
2018-01-20 21:41:01	25.5	24.945	25.32		25.826	25.695	26.5103	24.8273	24.9603	23.8407
2018-01-20 22:11:01	25.5	24.883	25.258		25.701	25.633	26.427	24.619	24.9187	23.799
2018-01-20 22:41:01	25.5	24.883	25.195		25.639	25.508	26.0313	24.4107	24.7103	23.6113
2018-01-20 23:11:01	25	24.758	25.133		25.576	25.508	25.948	24.369	24.502	23.403
2018-01-20 23:41:01	25	24.695	25.07		25.514	25.508	25.8853	24.3273	24.4603	23.382
2018-01-21 00:11:01	25	24.633	25.008		25.451	25.445	25.5103	24.3067	24.4393	23.382
2018-01-21 00:41:01	25	24.633	25.008		25.389	25.445	25.448	24.2857	24.4187	23.3613
2018-01-21 01:11:01	24.5	24.633	24.883		25.326	25.383	25.4063	24.0983	24.2103	23.3403
2018-01-21 01:41:01	24.5	24.57	24.82		25.264	25.32	25.0103	23.89	24.002	23.2987
2018-01-21 02:11:01	24.5	24.57	24.758		25.201	25.32	24.9687	23.8483	23.981	23.278
2018-01-21 02:41:01	24.5	24.508	24.695		25.139	25.258	24.927	23.8273	23.9393	23.0903
2018-01-21 03:11:01	24.5	24.445	24.633		25.076	25.258	24.8853	23.8067	23.9187	22.903
2018-01-21 03:41:01	24.5	24.383	24.633		25.076	25.195	24.4897	23.765	23.7103	22.8613
2018-01-21 04:11:01	24	24.383	24.57		25.014	25.195	24.448	23.5773	23.6893	22.8403
2018-01-21 04:41:01	24	24.383	24.508		24.951	25.133	24.427	23.369	23.481	22.8197
2018-01-21 05:11:01	24	24.383	24.445		24.951	25.07	24.3853	23.3483	23.4603	22.7987
2018-01-21 05:41:01	24	24.32	24.32		24.889	25.07	24.0103	23.3273	23.4393	22.7987
2018-01-21 06:11:01	24	24.258	24.258		24.826	25.07	23.9687	23.3067	23.4187	22.7777
2018-01-21 06:41:01	24	24.258	24.195		24.826	25.008	23.948	23.3067	23.231	22.7777
2018-01-21 07:11:01	24	24.195	24.133		24.764	25.008	23.9063	23.2857	23.1893	22.757
2018-01-21 07:41:01	24	24.133	24.133		24.764	25.008	23.9063	23.3067	23.1893	22.757
2018-01-21 08:11:01	24	24.195	24.133		24.764	25.008	23.8853	23.3273	23.1687	22.7987
2018-01-21 08:41:01	24	24.383	24.133		24.701	25.07	23.8853	23.3483	23.1687	22.7987
2018-01-21 09:11:01	24	24.57	24.32		24.764	25.133	23.9063	23.7857	23.1477	22.8403
2018-01-21 09:41:01	24	24.883	24.445		24.826	25.195	23.948	24.0773	23.1687	23.0903
2018-01-21 10:11:01	24.5	25.383	24.758		24.889	25.32	24.3437	24.5357	23.1893	23.3403
2018-01-21 10:41:01	24.5	25.883	25.07		25.014	25.508	24.427	25.0567	23.2103	23.6113
2018-01-21 11:11:01	25	26.57	25.445		25.139	25.695	24.8647	25.619	23.4187	24.0697
2018-01-21 11:41:01	25.5	27.32	25.57		25.326	25.758	25.3437	26.369	23.6687	24.528
2018-01-21 12:11:01	26	27.32	25.633		25.451	25.758	25.8853	27.348	23.8977	25.1113
2018-01-21 12:41:01	26.5	27.383	25.758		25.576	25.758	25.9897	27.6187	24.1477	25.5907
2018-01-21 13:11:01	27	27.57	26.32		25.764	26.008	26.4897	28.181	24.4187	26.0903
2018-01-21 13:41:01	27.5	28.944	26.383		25.951	26.07	27.3437	29.0767	24.7103	26.8197
2018-01-21 14:11:01	28	28.569	26.32		25.951	26.008	27.5103	29.1597	25.1477	26.9653
2018-01-21 14:41:01	28	27.945	26.383		26.076	26.07	27.531	28.66	25.1893	26.6737
2018-01-21 15:11:01	28	27.757	26.32		26.139	26.133	27.927	28.4517	25.3977	26.632
2018-01-21 15:41:01	28	27.445	26.32		26.139	26.07	27.9683	28.41	25.4393	26.4653
2018-01-21 16:11:01	27.5	27.133	26.32		26.139	26.07	27.9893	27.9933	25.6477	26.403
2018-01-21 16:41:01	27.5	27.195	26.32		26.139	26.07	27.9893	27.8893	25.6477	26.153
2018-01-21 17:11:01	27.5	27.32	26.258		26.201	26.07	28.01	27.8687	25.6687	26.132
2018-01-21 17:41:01	27.5	27.195	26.133		26.201	26.008	27.9893	27.6187	25.6893	26.0903
2018-01-21 18:11:01	27.5	26.82	26.008		26.139	25.945	27.7603	27.1397	25.6687	25.653
2018-01-21 18:41:01	27	26.383	25.945		26.139	26.008	27.531	26.6813	25.502	25.403
2018-01-21 19:11:01	27	26.133	25.82		26.076	25.945	27.4477	26.3897	25.4603	25.153
2018-01-21 19:41:01	26.5	25.82	25.695		26.076	25.82	27.052	25.9317	25.4393	24.8823
2018-01-21 20:11:01	26.5	25.57	25.508		25.951	25.695	26.9687	25.64	25.2103	24.6113
2018-01-21 20:41:01	26	25.258	25.383		25.826	25.57	26.5313	25.1817	25.002	24.3197
2018-01-21 21:11:01	26	25.07	25.258		25.764	25.508	26.448	24.89	24.9393	23.8823
2018-01-21 21:41:01	25.5	24.945	25.195		25.701	25.508	26.0313	24.4523	24.7103	23.4447
2018-01-21 22:11:01	25.5	24.82	25.133		25.639	25.508	25.948	24.369	24.481	23.3613
2018-01-21 22:41:01	25.5	24.758	25.07		25.576	25.508	25.8853	24.14	24.4393	23.3197
2018-01-21 23:11:01	25	24.758	25.008		25.514	25.445	25.4687	23.9107	24.231	23.1113
2018-01-21 23:41:01	25	24.695	24.945		25.451	25.445	25.427	23.89	24.1893	23.1113
2018-01-22 00:11:01	25	24.695	24.883		25.451	25.445	25.198	23.869	23.981	22.9237
2018-01-22 00:41:01	25	24.695	24.883		25.389	25.383	24.9897	23.8483	23.9603	23.278
2018-01-22 01:11:01	25	24.695	24.82		25.389	25.445	24.948	23.8483	23.9603	23.3197
2018-01-22 01:41:01	25	24.633	24.82		25.326	25.383	24.9063	23.8273	23.9393	23.3197
2018-01-22 02:11:01	24.5	24.633	24.82		25.326	25.383	24.8647	23.8067	23.9187	23.3197
2018-01-22 02:41:01	24.5	24.633	24.758		25.264	25.383	24.4897	23.8067	23.8977	23.3197
2018-01-22 03:11:01	24.5	24.633	24.695		25.264	25.32	24.448	23.7857	23.7103	23.2987
2018-01-22 03:41:01	24.5	24.57	24.695		25.201	25.32	24.427	23.7857	23.7103	23.3197
2018-01-22 04:11:01	24.5	24.508	24.633		25.139	25.258	24.4063	23.765	23.6893	23.3197
2018-01-22 04:41:01	24.5	24.445	24.57		25.139	25.195	24.3647	23.5773	23.502	23.2987
2018-01-22 05:11:01	24.5	24.383	24.508		25.076	25.133	23.9897	23.369	23.481	22.903
2018-01-22 05:41:01	24.5	24.258	24.508		25.014	25.133	23.948	23.3273	23.4603	22.8403
2018-01-22 06:11:01	24	24.133	24.445		24.951	25.07	23.9063	23.0983	23.4187	22.7987
2018-01-22 06:41:01	24	24.07	24.445		24.951	25.07	23.8647	23.0773	23.231	22.611
2018-01-22 07:11:01	24	24.07	24.445		24.889	25.07	23.8647	23.2857	23.2103	22.4443
2018-01-22 07:41:01	24	24.32	24.508		24.889	25.07	23.8647	23.369	23.2103	22.8403
2018-01-22 08:11:01	24	24.508	24.633		24.951	25.195	23.8853	23.744	23.2103	22.882
2018-01-22 08:41:01	24.5	24.883	24.883		25.014	25.258	23.927	24.119	23.231	23.3403
2018-01-22 09:11:01	24.5	25.445	25.383		25.139	25.383	24.3853	25.0983	23.4393	24.049
2018-01-22 09:41:01	25	26.008	26.133		25.389	25.633	24.9063	26.4107	23.6893	25.049
2018-01-22 10:11:01	25.5	26.508	26.695		25.639	25.883	25.927	28.3473	24.2103	26.5903
2018-01-22 10:41:01	26	27.133	26.695		25.826	26.008	26.6353	29.097	24.6893	27.382
2018-01-22 11:11:01	26.5	27.32	26.695		25.951	26.133	27.0727	28.8473	25.127	27.4237
2018-01-22 11:41:01	26.5	27.258	26.758		26.076	26.195	27.4687	28.764	25.377	27.007
2018-01-22 12:11:01	27	27.383	26.883		26.139	26.258	27.5103	28.7433	25.4393	26.9653
2018-01-22 12:41:01	27	27.445	26.883		26.201	26.258	27.927	28.764	25.6477	26.9443
2018-01-22 13:11:01	27.5	27.383	26.945		26.326	26.258	27.9893	28.7847	25.877	26.9653
2018-01-22 13:41:01	27.5	27.507	27.133		26.389	26.32	28.406	29.2637	25.9603	27.382
2018-01-22 14:11:01	28	28.007	27.32		26.514	26.383	28.51	29.3263	26.1893	27.4237
2018-01-22 14:41:01	28	28.257	27.258		26.639	26.508	28.9057	29.1387	26.3977	27.1943
2018-01-22 15:11:01	28	27.945	27.383		26.701	26.57	28.9473	29.097	26.3977	26.653
2018-01-22 15:41:01	28.5	28.257	27.258		26.701	26.32	28.989	29.0763	26.3767	26.1947
2018-01-22 16:11:01	28.5	28.007	27.133		26.639	26.133	29.01	28.639	26.1893	26.1113
2018-01-22 16:41:01	28	27.32	27.07		26.639	26.195	28.989	28.5557	26.002	25.7157
2018-01-22 17:11:01	28	27.133	27.008		26.639	26.258	29.01	28.3683	25.981	25.674
2018-01-22 17:41:01	28	27.133	26.945		26.701	26.383	29.01	28.389	25.981	25.903
2018-01-22 18:11:01	28	27.195	26.883		26.701	26.383	28.989	28.285	26.002	25.903
2018-01-22 18:41:01	28	26.883	26.758		26.701	26.383	28.76	27.806	25.981	25.8823
2018-01-22 19:11:01	27.5	26.508	26.633		26.701	26.383	28.4893	27.2853	25.9603	25.653
2018-01-22 19:41:01	27.5	26.195	26.57		26.701	26.445	28.2393	26.7647	25.9187	25.3823
2018-01-22 20:11:01	27	26.07	26.508		26.639	26.445	27.9683	26.2647	25.8977	25.1113
2018-01-22 20:41:01	27	25.945	26.383		26.639	26.445	27.531	25.9523	25.6687	24.8823
2018-01-22 21:11:01	26.5	25.883	26.32		26.639	26.383	27.427	25.6607	25.4603	24.6323
2018-01-22 21:41:01	26.5	25.758	26.258		26.576	26.32	27.177	25.4107	25.4187	24.403
2018-01-22 22:11:01	26.5	25.695	26.133		26.514	26.258	26.927	25.1607	25.2103	24.3613
2018-01-22 22:41:01	26.5	25.57	26.008		26.451	26.133	26.677	24.9317	25.1687	24.3197
2018-01-22 23:11:01	26	25.383	25.945		26.389	26.133	26.448	24.8483	24.9603	23.924
2018-01-22 23:41:01	26	25.258	25.82		26.326	26.07	26.3647	24.64	24.9187	23.8823
2018-01-23 00:11:01	26	25.133	25.758		26.264	26.008	25.948	24.4107	24.7103	23.8407
2018-01-23 00:41:01	25.5	24.945	25.695		26.201	25.945	25.8853	24.3273	24.6687	23.778
2018-01-23 01:11:01	25.5	24.945	25.695		26.139	25.945	25.4897	24.119	24.4603	23.403
2018-01-23 01:41:01	25.5	25.008	25.57		26.076	25.945	25.427	23.9107	24.4393	23.382
2018-01-23 02:11:01	25.5	25.07	25.508		26.014	25.883	25.3647	23.89	24.231	23.3403
2018-01-23 02:41:01	25.5	25.008	25.445		25.951	25.82	25.1563	23.869	24.1893	23.3403
2018-01-23 03:11:01	25	24.883	25.383		25.889	25.758	24.927	23.8483	24.002	23.3197
2018-01-23 03:41:01	25	24.82	25.32		25.826	25.695	24.8853	23.8273	23.9603	23.2987
2018-01-23 04:11:01	25	24.82	25.258		25.764	25.695	24.8437	23.8067	23.9393	23.2987
2018-01-23 04:41:01	25	24.758	25.258		25.701	25.633	24.6563	23.7857	23.9187	23.278
2018-01-23 05:11:01	25	24.758	25.195		25.701	25.633	24.448	23.765	23.731	23.278
2018-01-23 05:41:01	25	24.82	25.195		25.639	25.633	24.427	23.7857	23.731	23.2987
2018-01-23 06:11:01	25	24.82	25.133		25.639	25.633	24.4063	23.7857	23.7103	23.3403
2018-01-23 06:41:01	24.5	24.82	25.133		25.576	25.633	24.3853	23.8067	23.7103	23.3403
2018-01-23 07:11:01	24.5	24.883	25.195		25.576	25.695	24.3647	23.8273	23.6893	23.3403
2018-01-23 07:41:01	25	25.07	25.32		25.576	25.758	24.3853	24.244	23.6893	23.403
2018-01-23 08:11:01	25	25.258	25.445		25.576	25.758	24.4063	24.4107	23.7103	23.8197
2018-01-23 08:41:01	25	25.633	25.883		25.701	25.883	24.823	25.369	23.9187	24.3407
2018-01-23 09:11:01	25.5	26.008	26.57		25.889	26.133	25.3437	26.8897	24.1687	25.5073
2018-01-23 09:41:01	26	26.445	27.07		26.076	26.258	25.9063	28.2847	24.627	26.382
2018-01-23 10:11:01	26	26.695	27.632		26.326	26.445	26.8437	29.534	25.127	27.4237
2018-01-23 10:41:01	26.5	26.945	28.007		26.576	26.633	28.0937	31.678	25.6687	28.8813
2018-01-23 11:11:01	27	27.632	28.819		26.826	26.945	28.8227	32.0947	26.1477	29.1937
2018-01-23 11:41:01	27.5	28.632	29.506		27.076	27.195	29.8013	33.4687	26.6477	29.6933
2018-01-23 12:11:01	28	28.819	30.63		27.388	27.57	30.926	35.5083	27.3557	30.7137
2018-01-23 12:41:01	28.5	29.006	31.316		27.763	27.882	32.4047	37.277	28.064	31.6507
2018-01-23 13:11:01	29	30.005	31.753		28.076	28.132	33.425	37.5683	28.5847	31.7963
2018-01-23 13:41:01	31	33.313	31.628		28.325	28.132	33.9873	36.6523	28.9177	31.5463
2018-01-23 14:11:01	31.5	33.125	31.378		28.45	28.132	34.4663	35.6537	29.1677	31.026
2018-01-23 14:41:01	31.5	32.127	30.942		28.45	28.007	34.3203	34.53	29.3967	30.464
2018-01-23 15:11:01	30.5	30.754	30.38	31.5	28.388	27.882	34.0497	33.0937	29.3967	29.756
2018-01-23 15:41:01	30	29.443	29.631	27.5	28.201	27.57	33.55	31.7617	29.001	29.1103
2018-01-23 16:11:01	29.5	28.444	29.069	27	28.138	27.508	33.0293	30.471	28.897	28.1523
2018-01-23 16:41:01	29	28.132	28.632	27	27.951	27.383	32.2797	29.2637	28.3973	26.9237
2018-01-23 17:11:01	28.5	27.757	28.257	26.5	27.826	27.258	31.5717	28.2223	27.939	26.3197
2018-01-23 17:41:01	28.5	27.32	27.945	26.5	27.701	27.133	31.051	27.7853	27.835	25.8197
2018-01-23 18:11:01	28	27.258	27.695	26.5	27.576	27.07	30.5303	27.2647	27.3973	25.3823
2018-01-23 18:41:01	28	27.195	27.507	26	27.451	26.945	30.197	26.9313	27.1477	25.278
2018-01-23 19:11:01	27.5	26.883	27.258	26	27.326	26.82	29.718	26.4523	26.8977	24.8613
2018-01-23 19:41:01	27.5	26.758	26.945	26	27.201	26.633	29.2183	25.973	26.481	24.6113
2018-01-23 20:11:01	27	26.57	26.758	25.5	27.014	26.445	28.9267	25.869	26.3977	24.403
2018-01-23 20:41:01	27	26.32	26.57	25.5	26.889	26.383	28.4683	25.619	26.1687	24.3613
2018-01-23 21:11:01	26.5	26.133	26.32	25	26.764	26.258	28.01	25.39	25.9393	24.3197
2018-01-23 21:41:01	26.5	26.008	26.195	25	26.639	26.258	27.906	25.3273	25.856	24.1113
2018-01-23 22:11:01	26	25.883	26.07	25	26.514	26.195	27.4687	25.0773	25.4603	23.8823
2018-01-23 22:41:01	26	25.758	26.008	25	26.389	26.133	27.1977	24.8483	25.3977	23.8197
2018-01-23 23:11:01	26	25.695	25.883	25	26.264	26.07	26.927	24.619	25.002	23.6113
2018-01-23 23:41:01	26	25.633	25.82	25	26.201	26.008	26.6563	24.5773	24.9393	23.403
2018-01-24 00:11:01	25.5	25.57	25.695	25	26.076	25.945	26.4063	24.3483	24.8977	23.3613
2018-01-24 00:41:01	25.5	25.445	25.57	25	26.014	25.883	26.1563	24.3067	24.6687	23.3197
2018-01-24 01:11:01	25.5	25.383	25.508	24.5	25.889	25.758	25.927	24.0983	24.4603	23.1113
2018-01-24 01:41:01	25	25.32	25.383	24.5	25.826	25.695	25.8437	23.869	24.4187	22.903
2018-01-24 02:11:01	25	25.195	25.32	24.5	25.701	25.695	25.427	23.8273	24.1893	22.8613
2018-01-24 02:41:01	25	25.133	25.258	24.5	25.639	25.633	25.3647	23.8067	23.981	22.8613
2018-01-24 03:11:01	25	25.133	25.195	24.5	25.576	25.633	25.1563	23.8067	23.9603	22.882
2018-01-24 03:41:01	25	25.133	25.133	24.5	25.514	25.57	24.948	23.7857	23.9393	22.903
2018-01-24 04:11:01	24.5	25.07	25.07	24.5	25.451	25.508	24.9063	23.7857	23.8977	22.882
2018-01-24 04:41:01	24.5	25.008	25.008	24.5	25.389	25.508	24.8647	23.7857	23.8977	22.9237
2018-01-24 05:11:01	24.5	25.008	24.945	24.5	25.389	25.508	24.8437	23.8067	23.7103	23.2987
2018-01-24 05:41:01	24.5	24.945	24.883	24.5	25.264	25.383	24.6353	23.8273	23.7103	23.3403
2018-01-24 06:11:01	24.5	24.883	24.82	24.5	25.201	25.32	24.4687	23.8483	23.7103	23.3613
2018-01-24 06:41:01	24.5	24.82	24.82	24.5	25.201	25.32	24.427	23.869	23.7103	23.382
2018-01-24 07:11:01	24.5	24.883	24.883	24.5	25.139	25.32	24.427	23.9107	23.7103	23.5697
2018-01-24 07:41:01	24.5	24.945	24.945	24.5	25.139	25.383	24.427	24.4317	23.7103	23.5903
2018-01-24 08:11:01	24.5	25.008	25.133	25	25.201	25.508	24.8647	25.619	23.8977	24.0697
2018-01-24 08:41:01	24.5	25.258	25.508	26	25.326	25.758	25.6147	27.2847	23.9603	25.028
2018-01-24 09:11:01	24.5	25.57	26.133	27	25.576	26.008	26.4063	28.971	24.3977	25.8407
2018-01-24 09:41:01	25	25.945	26.82	27.5	25.826	26.32	27.177	30.241	24.877	27.0487
2018-01-24 10:11:01	25	26.258	27.632	28.5	26.201	26.57	28.1977	31.719	25.377	28.111
2018-01-24 10:41:01	25.5	26.945	28.195	29	26.514	26.883	29.135	32.5517	25.877	29.048
2018-01-24 11:11:01	26	28.132	28.569	29	26.764	27.07	29.9263	33.572	26.356	29.5893
2018-01-24 11:41:01	26.5	28.694	29.443	31	27.076	27.32	30.3013	33.343	26.6477	29.7143
2018-01-24 12:11:01	27.5	29.506	30.068	31	27.388	27.633	30.9677	33.302	26.856	29.1937
2018-01-24 12:41:01	28	30.317	30.068	30.5	27.638	27.633	31.2383	32.5943	27.106	29.1313
2018-01-24 13:11:01	29	30.567	29.756	29	27.638	27.508	31.03	31.2203	27.085	27.9857
2018-01-24 13:41:01	29.5	29.88	29.443	28.5	27.638	27.32	30.822	30.2003	26.8767	27.4237
2018-01-24 14:11:01	29.5	29.256	29.194	28	27.638	27.195	30.6137	29.7633	26.856	27.111
2018-01-24 14:41:01	29.5	28.819	29.006	27.5	27.638	27.195	30.3843	29.2427	26.835	26.6737
2018-01-24 15:11:01	29.5	28.444	28.694	27	27.638	27.133	30.322	28.9303	26.8143	26.6113
2018-01-24 15:41:01	29	28.007	28.382	27	27.576	27.008	30.072	28.5973	26.7933	26.1947
2018-01-24 16:11:01	29	27.757	28.132	27	27.513	26.945	29.8013	27.91	26.4183	26.0903
2018-01-24 16:41:01	28.5	27.632	27.945	26.5	27.451	26.945	29.343	27.5353	26.3767	25.6113
2018-01-24 17:11:01	28.5	27.57	27.695	26.5	27.388	27.008	29.0933	27.2853	26.3353	25.3823
2018-01-24 17:41:01	28	27.32	27.445	26.5	27.263	26.883	28.8223	26.8063	25.9393	24.9447
2018-01-24 18:11:01	28	27.07	27.133	26	27.201	26.758	28.531	26.494	25.8977	24.8823
2018-01-24 18:41:01	27.5	26.758	26.883	25.5	27.076	26.633	28.2393	26.2023	25.8353	24.6323
2018-01-24 19:11:01	27	26.57	26.57	25.5	26.951	26.633	27.9683	25.9107	25.4603	24.403
2018-01-24 19:41:01	27	26.445	26.32	25.5	26.826	26.445	27.531	25.4733	25.3977	24.3407
2018-01-24 20:11:01	26.5	26.258	26.07	25	26.701	26.32	27.2603	25.369	25.356	23.9447
2018-01-24 20:41:01	26.5	26.133	25.758	25	26.639	26.195	26.9893	24.9317	24.9603	23.903
2018-01-24 21:11:01	26	26.008	25.57	24.5	26.514	26.195	26.552	24.8273	24.8977	23.8407
2018-01-24 21:41:01	26	25.883	25.383	24.5	26.389	26.133	26.4687	24.5983	24.8353	23.8197
2018-01-24 22:11:01	25.5	25.758	25.258	24.5	26.326	26.008	26.052	24.369	24.4603	23.4447
2018-01-24 22:41:01	25.5	25.695	25.133	24.5	26.201	26.008	25.9687	24.3273	24.4187	23.4237
2018-01-24 23:11:01	25.5	25.633	25.07	24.5	26.139	25.945	25.9063	24.2857	24.377	23.382
2018-01-24 23:41:01	25.5	25.57	25.008	24.5	26.014	25.883	25.5103	24.0773	24.356	23.3613
2018-01-25 00:11:01	25	25.445	24.945	24.5	25.951	25.883	25.448	24.0567	24.1477	23.3403
2018-01-25 00:41:01	25	25.383	24.883	24.5	25.889	25.758	25.3853	23.8483	23.9393	23.2987
2018-01-25 01:11:01	25	25.445	24.883	24.5	25.826	25.758	24.9897	23.8067	23.9187	23.1113
2018-01-25 01:41:01	25	25.383	24.82	24.5	25.764	25.758	24.948	23.7857	23.877	22.9237
2018-01-25 02:11:01	25	25.32	24.82	24.5	25.701	25.695	24.8853	23.7857	23.856	22.9237
2018-01-25 02:41:01	25	25.32	24.758	24.5	25.639	25.695	24.677	23.765	23.6687	22.9237
2018-01-25 03:11:01	24.5	25.258	24.758	24.5	25.576	25.695	24.4687	23.765	23.481	22.9237
2018-01-25 03:41:01	24.5	25.195	24.695	24.5	25.576	25.633	24.448	23.5773	23.4603	22.903
2018-01-25 04:11:01	24.5	25.133	24.695	24.5	25.451	25.57	24.4063	23.5567	23.4603	22.882
2018-01-25 04:41:01	24.5	25.07	24.633	24.5	25.389	25.508	24.3647	23.3483	23.4187	22.8403
2018-01-25 05:11:01	24.5	25.008	24.633	24.5	25.389	25.445	23.9897	23.3067	23.3977	22.7987
2018-01-25 05:41:01	24.5	24.945	24.57	24.5	25.326	25.445	23.948	23.2857	23.2103	22.611
2018-01-25 06:11:01	24.5	24.945	24.57	24.5	25.264	25.445	23.9063	23.0773	23.1893	22.4237
2018-01-25 06:41:01	24.5	24.883	24.57	24.5	25.264	25.445	23.8647	23.0567	22.981	22.4027
2018-01-25 07:11:01	24.5	24.945	24.633	24.5	25.201	25.508	23.8647	23.244	22.981	22.4027
2018-01-25 07:41:01	24.5	25.008	24.82	25	25.264	25.57	23.8853	23.619	22.9603	22.8197
2018-01-25 08:11:01	24.5	25.258	24.945	25.5	25.326	25.695	23.948	24.4317	23.002	23.153
2018-01-25 08:41:01	24.5	25.445	25.258	26	25.451	25.883	24.4063	25.244	23.1893	23.653
2018-01-25 09:11:01	24.5	25.695	25.758	26.5	25.639	26.133	25.1563	27.056	23.4603	24.674
2018-01-25 09:41:01	25	26.008	26.445	27.5	25.889	26.383	25.8853	28.2427	23.9393	25.653
2018-01-25 10:11:01	25	26.383	27.07	28.5	26.201	26.633	26.8853	29.7623	24.3977	26.653
2018-01-25 10:41:01	25.5	27.07	27.57	29	26.514	26.82	27.7187	31.1153	24.877	27.6317
2018-01-25 11:11:01	26	28.07	28.007	29.5	26.764	27.07	28.51	32.1357	25.1687	28.319
2018-01-25 11:41:01	26.5	28.819	28.569	30	27.014	27.195	29.26	32.7813	25.6477	28.8397
2018-01-25 12:11:01	27.5	29.443	29.319	31	27.326	27.508	30.0513	33.5097	26.3143	29.527
2018-01-25 12:41:01	28	29.693	30.068	31	27.576	27.695	31.5093	35.8617	26.856	30.36
2018-01-25 13:11:01	28.5	29.88	30.63	31	27.888	27.945	32.5087	36.3613	27.5433	30.8803
2018-01-25 13:41:01	30	32.938	30.754	30.5	28.076	28.007	33.0917	35.945	28.0433	30.693
2018-01-25 14:11:01	31.5	34.996	30.505	30	28.201	27.945	33.321	34.6547	28.1263	30.2347
2018-01-25 14:41:01	32	32.876	30.13	29	28.201	27.882	33.3417	33.5727	28.3347	29.735
2018-01-25 15:11:01	32	31.753	29.943	29	28.201	27.882	33.55	33.427	28.3557	29.1937
2018-01-25 15:41:01	32	31.566	29.756	29	28.201	27.882	33.3417	32.6363	28.3557	28.8813
2018-01-25 16:11:01	31.5	30.817	29.381	28	28.138	27.82	33.0503	31.5537	28.3347	28.215
2018-01-25 16:41:01	31	30.068	29.006	28	28.076	27.695	32.821	31.2207	28.168	27.9443
2018-01-25 17:11:01	31	30.005	28.694	27.5	28.013	27.57	32.363	30.492	28.1263	27.6527
2018-01-25 17:41:01	30.5	29.256	28.444	27.5	27.888	27.445	32.0297	29.701	27.918	27.1737
2018-01-25 18:11:01	30	28.694	28.195	27	27.826	27.32	31.5507	29.118	27.689	26.7153
2018-01-25 18:41:01	29.5	28.195	27.882	27	27.701	27.258	31.051	28.5557	27.46	26.4237
2018-01-25 19:11:01	29	27.882	27.632	26.5	27.576	27.07	30.551	27.8267	27.3973	26.153
2018-01-25 19:41:01	29	27.445	27.32	26	27.451	26.945	30.218	27.452	26.981	25.6947
2018-01-25 20:11:01	28.5	27.258	27.07	26	27.326	26.883	29.9057	26.952	26.9183	25.403
2018-01-25 20:41:01	28	26.945	26.82	25.5	27.201	26.883	29.4057	26.473	26.6683	25.153
2018-01-25 21:11:01	27.5	26.82	26.508	25.5	27.076	26.695	28.9473	26.369	26.4183	24.903
2018-01-25 21:41:01	27	26.57	26.258	25.5	27.014	26.633	28.4893	25.9317	26.356	24.8613
2018-01-25 22:11:01	27	26.445	26.07	25	26.889	26.57	28.1977	25.8273	25.9603	24.4657
2018-01-25 22:41:01	26.5	26.32	25.945	25	26.764	26.508	27.927	25.5567	25.877	24.403
2018-01-25 23:11:01	26.5	26.258	25.82	25	26.701	26.445	27.4893	25.3067	25.6687	24.3613
2018-01-25 23:41:01	26	26.195	25.758	25	26.576	26.383	27.3853	25.0773	25.4393	24.3197
2018-01-26 00:11:01	26	26.133	25.695	25	26.514	26.383	26.9687	25.0357	25.3977	23.9447
2018-01-26 00:41:01	26	26.07	25.633	25	26.451	26.32	26.8853	24.8273	25.1893	23.924
2018-01-26 01:11:01	26	26.07	25.57	25	26.389	26.258	26.4687	24.8067	24.981	23.903
2018-01-26 01:41:01	25.5	25.945	25.383	24.5	26.326	26.195	26.4063	24.765	24.9393	23.8823
2018-01-26 02:11:01	25.5	25.82	25.195	24.5	26.201	26.07	26.3437	24.5773	24.8977	23.8823
2018-01-26 02:41:01	25.5	25.695	25.133	24.5	26.139	26.008	25.948	24.5567	24.856	23.8613
2018-01-26 03:11:01	25.5	25.633	25.133	24.5	26.076	26.008	25.8853	24.515	24.502	23.8197
2018-01-26 03:41:01	25	25.633	25.07	24.5	26.014	26.008	25.8437	24.494	24.4603	23.8197
2018-01-26 04:11:01	25	25.633	25.07	24.5	25.951	25.945	25.448	24.3067	24.4393	23.799
2018-01-26 04:41:01	25	25.57	25.008	24.5	25.889	25.945	25.4063	24.2857	24.3977	23.799
2018-01-26 05:11:01	25	25.57	25.008	24.5	25.826	25.945	25.3647	24.2857	24.377	23.799
2018-01-26 05:41:01	25	25.57	25.008	24.5	25.826	25.945	24.9897	24.244	24.1893	23.4447
2018-01-26 06:11:01	25	25.508	24.945	24.5	25.764	25.945	24.948	24.0773	24.002	23.4237
2018-01-26 06:41:01	25	25.508	24.945	24.5	25.764	25.945	24.927	24.0567	23.981	23.4237
2018-01-26 07:11:01	25	25.508	24.945	25	25.764	25.883	24.8853	24.244	23.9603	23.4447
2018-01-26 07:41:01	25	25.508	25.008	25	25.701	25.945	24.8853	24.265	23.9393	23.799
2018-01-26 08:11:01	25	25.57	25.008	25	25.701	25.945	24.8647	24.3067	23.9393	23.8197
2018-01-26 08:41:01	25	25.633	25.133	25	25.701	26.008	24.8647	24.5357	23.9393	23.8613
2018-01-26 09:11:01	25	26.008	25.258	25.5	25.764	26.07	24.9063	24.8273	23.9603	23.924
2018-01-26 09:41:01	25	26.07	25.445	25.5	25.826	26.133	24.927	25.2857	23.981	24.3407
2018-01-26 10:11:01	25.5	26.508	25.695	26	25.889	26.258	25.3437	25.869	24.002	24.424
2018-01-26 10:41:01	25.5	26.883	26.07	27	26.014	26.445	25.9063	27.098	24.4603	25.299
2018-01-26 11:11:01	26	27.383	26.57	28	26.201	26.633	26.4063	28.2437	24.5437	25.6113
2018-01-26 11:41:01	26.5	27.945	26.945	28	26.326	26.758	27.156	29.4303	24.981	26.382
2018-01-26 12:11:01	26.5	28.195	27.008	28	26.451	26.758	27.9477	31.3047	25.2727	27.0903
2018-01-26 12:41:01	27	28.382	27.07	27.5	26.514	26.883	29.01	33.3033	25.752	27.6317
2018-01-26 13:11:01	27	28.257	27.258	27.5	26.639	26.883	29.8013	33.8653	26.0227	28.0483
2018-01-26 13:41:01	27.5	29.006	27.195	27.5	26.701	26.82	30.3637	33.9067	26.2517	28.2567
2018-01-26 14:11:01	27.5	28.944	27.258	27.5	26.764	26.883	30.6343	32.97	26.2727	27.7983
2018-01-26 14:41:01	28	29.756	27.445	28	26.889	27.008	31.0927	32.7617	26.5017	28.0277
2018-01-26 15:11:01	29	30.068	27.195	27.5	27.076	26.883	31.3633	32.512	26.7517	28.236
2018-01-26 15:41:01	28.5	28.944	27.195	27.5	27.076	26.945	31.5923	32.2203	26.96	28.0693
2018-01-26 16:11:01	29	29.319	27.195	27.5	27.076	26.945	31.634	31.95	27.0433	28.2983
2018-01-26 16:41:01	29	29.006	26.883	26.5	26.951	26.883	31.4257	30.8253	27.0433	27.84
2018-01-26 17:11:01	28.5	28.382	26.695	26	26.826	26.57	30.8843	29.1597	26.981	26.632
2018-01-26 17:41:01	28.5	27.695	26.508	26	26.764	26.508	30.3843	28.3473	26.731	26.0697
2018-01-26 18:11:01	28	27.507	26.383	26	26.701	26.508	30.072	27.6187	26.5017	25.6113
2018-01-26 18:41:01	28	27.195	26.258	25.5	26.701	26.445	29.5723	27.0563	26.4393	25.3407
2018-01-26 19:11:01	27.5	26.945	26.133	25.5	26.639	26.445	29.0933	26.5147	26.0433	25.0907
2018-01-26 19:41:01	27.5	26.758	26.008	25.5	26.576	26.383	28.614	26.0357	25.981	24.8613
2018-01-26 20:11:01	27	26.633	25.883	25.5	26.514	26.32	28.4683	25.9317	25.9393	24.8197
2018-01-26 20:41:01	27	26.445	25.758	25.5	26.389	26.258	28.01	25.494	25.5437	24.6113
2018-01-26 21:11:01	26.5	26.32	25.758	25.5	26.389	26.195	27.7393	25.4107	25.502	24.403
2018-01-26 21:41:01	26.5	26.258	25.695	25.5	26.326	26.195	27.4687	25.1817	25.4603	24.3613
2018-01-26 22:11:01	26.5	26.195	25.633	25.5	26.264	26.195	27.031	25.119	25.4187	24.3407
2018-01-26 22:41:01	26	26.133	25.633	25.5	26.201	26.133	26.9477	24.9107	25.0437	24.3407
2018-01-26 23:11:01	26	26.133	25.508	25.5	26.139	26.07	26.698	24.8483	25.002	24.1113
2018-01-26 23:41:01	26	26.008	25.508	25.5	26.139	26.07	26.448	24.619	24.9603	23.903
2018-01-27 00:11:01	26	25.945	25.445	25	26.076	26.008	26.3647	24.5773	24.9187	23.8823
2018-01-27 00:41:01	25.5	25.883	25.383	25	26.014	25.945	25.948	24.369	24.7103	23.8407
2018-01-27 01:11:01	25.5	25.82	25.32	25	25.951	25.883	25.9063	24.3483	24.502	23.8407
2018-01-27 01:41:01	25.5	25.695	25.258	25	25.889	25.758	25.6563	24.3067	24.481	23.799
2018-01-27 02:11:01	25.5	25.633	25.195	25	25.826	25.758	25.448	24.2857	24.4393	23.6323
2018-01-27 02:41:01	25.5	25.633	25.133	25	25.764	25.695	25.3853	24.0983	24.4187	23.6323
2018-01-27 03:11:01	25	25.57	25.07	25	25.701	25.695	25.3437	24.0773	24.231	23.4447
2018-01-27 03:41:01	25	25.508	25.008	24.5	25.639	25.633	24.9687	24.0567	24.0227	23.4237
2018-01-27 04:11:01	25	25.445	24.945	24.5	25.576	25.57	24.927	24.0357	24.002	23.403
2018-01-27 04:41:01	25	25.32	24.883	24.5	25.514	25.508	24.8853	23.8483	23.981	23.3613
2018-01-27 05:11:01	25	25.258	24.82	24.5	25.451	25.445	24.6563	23.7857	23.9393	23.3197
2018-01-27 05:41:01	25	25.195	24.758	24.5	25.389	25.32	24.427	23.5773	23.752	22.9237
2018-01-27 06:11:01	24.5	25.133	24.695	24.5	25.326	25.258	24.3853	23.3483	23.5437	22.8403
2018-01-27 06:41:01	24.5	25.008	24.633	24.5	25.264	25.258	24.323	23.3067	23.502	22.8403
2018-01-27 07:11:01	24.5	25.008	24.758	24.5	25.264	25.258	24.302	23.3273	23.481	22.8613
2018-01-27 07:41:01	24.5	25.07	24.883	24.5	25.326	25.445	24.323	23.869	23.481	23.278
2018-01-27 08:11:01	24.5	25.32	25.07	25	25.451	25.57	24.427	24.7023	23.502	23.778
2018-01-27 08:41:01	24.5	25.633	25.32	25.5	25.576	25.758	24.9063	25.8063	23.731	24.3407
2018-01-27 09:11:01	25	25.945	25.695	26	25.701	25.945	25.3853	26.598	23.9603	24.8407
2018-01-27 09:41:01	25	26.195	26.133	27	25.951	26.195	25.927	28.0767	24.252	25.9863
2018-01-27 10:11:01	25.5	26.758	26.57	27.5	26.139	26.383	26.4687	28.8677	24.7103	26.5903
2018-01-27 10:41:01	26	27.133	27.07	27.5	26.389	26.57	27.2603	30.367	25.2103	27.5903
2018-01-27 11:11:01	26	27.383	27.757	29.5	26.701	26.758	28.3017	32.053	25.752	28.7567
2018-01-27 11:41:01	26.5	27.632	29.194	31.5	27.014	27.07	29.5723	34.093	26.4393	29.4227
2018-01-27 12:11:01	27	27.632	30.193	32	27.326	27.32	30.8843	36.216	27.0017	30.3807
2018-01-27 12:41:01	27.5	28.007	30.38	31	27.576	27.32	32.1547	36.194	27.71	30.4433
2018-01-27 13:11:01	28	28.507	30.754	30.5	27.763	27.383	33.4457	37.589	28.2307	30.7763
2018-01-27 13:41:01	30	33.001	30.879	30	27.951	27.445	34.6743	38.88	28.7303	31.1093
2018-01-27 14:11:01	32.5	37.24	30.505	29	28.076	27.383	35.7777	39.838	29.2093	31.255
2018-01-27 14:41:01	34.5	38.735	30.13	28	28.138	27.195	36.798	40.3173	29.5217	31.6507
2018-01-27 15:11:01	36.5	39.109	29.756	27.5	28.201	27.195	37.36	39.9017	29.9383	31.255
2018-01-27 15:41:01	37.5	38.86	29.568	27	28.263	27.32	37.797	39.4237	30.0007	31.0467
2018-01-27 16:11:01	38	37.302	29.319	27	28.263	27.383	37.7763	37.904	30.0213	30.8177
2018-01-27 16:41:01	37	33.562	29.069	27	28.263	27.445	37.3183	36.176	30.0213	30.5263
2018-01-27 17:11:01	36	31.691	28.881	27	28.263	27.32	36.798	35.0517	30.0213	30.2557
2018-01-27 17:41:01	35	30.255	28.569	26.5	28.138	27.133	36.2357	33.532	29.98	29.61
2018-01-27 18:11:01	33.5	29.319	28.257	26.5	28.013	27.133	35.424	32.2827	29.8757	28.9853
2018-01-27 18:41:01	33	28.881	28.007	26	27.951	27.008	34.6327	30.8877	29.4383	28.2567
2018-01-27 19:11:01	32	28.319	27.757	26	27.826	27.008	33.6747	29.8677	29.001	27.5277
2018-01-27 19:41:01	31	27.945	27.57	26	27.701	27.008	33.0503	29.0553	28.8763	27.1737
2018-01-27 20:11:01	30.5	27.695	27.383	26	27.576	27.008	32.4673	28.1183	28.4387	26.6737
2018-01-27 20:41:01	30	27.445	27.133	25.5	27.451	26.883	31.5507	27.5353	28.0013	26.1947
2018-01-27 21:11:01	29.5	27.32	26.945	25.5	27.326	26.82	30.9887	27.0147	27.8973	25.6947
2018-01-27 21:41:01	29	27.195	26.695	25.5	27.201	26.758	30.447	26.5147	27.439	25.403
2018-01-27 22:11:01	28.5	27.133	26.258	25	27.014	26.508	29.9263	26.0563	27.0223	25.1113
2018-01-27 22:41:01	28	26.883	26.07	25	26.826	26.445	29.4267	25.9107	26.9183	24.8613
2018-01-27 23:11:01	27.5	26.695	25.883	25	26.701	26.32	28.9267	25.4733	26.5017	24.6113
2018-01-27 23:41:01	27	26.57	25.695	25	26.576	26.258	28.4477	25.2233	26.4183	24.3823
2018-01-28 00:11:01	27	26.383	25.633	25	26.451	26.195	27.9683	24.9733	26.002	24.1323
2018-01-28 00:41:01	26.5	26.383	25.508	25	26.326	26.133	27.677	24.9107	25.9187	23.903
2018-01-28 01:11:01	26.5	26.195	25.445	25	26.201	26.07	27.406	24.6817	25.502	23.8613
2018-01-28 01:41:01	26	26.133	25.32	24.5	26.076	25.945	26.9477	24.619	25.4393	23.8197
2018-01-28 02:11:01	26	25.945	25.195	24.5	25.951	25.82	26.8647	24.39	25.0227	23.4447
2018-01-28 02:41:01	25.5	25.758	25.07	24.5	25.826	25.695	26.4063	24.14	24.9603	23.3613
2018-01-28 03:11:01	25.5	25.695	24.945	24.5	25.764	25.633	26.1563	23.9107	24.8977	23.132
2018-01-28 03:41:01	25.5	25.633	24.883	24.5	25.639	25.633	25.8853	23.869	24.502	22.9237
2018-01-28 04:11:01	25	25.57	24.758	24.5	25.576	25.57	25.6563	23.8273	24.4393	22.9237
2018-01-28 04:41:01	25	25.508	24.695	24	25.514	25.57	25.4063	23.64	24.3977	22.903
2018-01-28 05:11:01	25	25.508	24.695	24.5	25.451	25.57	25.3437	23.64	24.0227	22.903
2018-01-28 05:41:01	25	25.445	24.633	24.5	25.389	25.508	25.1353	23.619	23.981	22.882
2018-01-28 06:11:01	24.5	25.383	24.57	24.5	25.389	25.508	24.9063	23.5983	23.9393	22.882
2018-01-28 06:41:01	24.5	25.383	24.57	24.5	25.326	25.508	24.8647	23.5983	23.9187	22.882
2018-01-28 07:11:01	24.5	25.383	24.633	24.5	25.326	25.508	24.8437	23.8067	23.8977	22.882
2018-01-28 07:41:01	24.5	25.57	24.758	25	25.389	25.57	24.8437	24.0983	23.7103	23.2987
2018-01-28 08:11:01	25	25.758	24.945	25	25.514	25.758	24.8853	24.8067	23.8977	23.382
2018-01-28 08:41:01	25	26.07	25.133	25.5	25.576	25.883	25.1353	25.4733	23.9187	23.8613
2018-01-28 09:11:01	25	26.32	25.445	26.5	25.764	26.07	25.4687	26.8687	23.981	24.8197
2018-01-28 09:41:01	25.5	26.633	25.945	27	26.014	26.32	26.177	28.014	24.4393	25.8197
2018-01-28 10:11:01	25.5	27.07	26.258	27.5	26.139	26.445	26.906	29.2843	24.731	26.6113
2018-01-28 10:41:01	26	27.258	26.758	28	26.389	26.758	27.4687	30.2213	25.2103	27.361
2018-01-28 11:11:01	26.5	27.57	27.195	28	26.639	26.82	28.7183	32.6363	25.731	28.569
2018-01-28 11:41:01	26.5	27.945	27.445	28	26.764	26.82	29.7597	33.8017	26.2517	29.402
2018-01-28 12:11:01	27	28.07	27.445	28	26.764	26.758	30.0513	32.969	26.5227	28.9853
2018-01-28 12:41:01	27.5	28.07	27.82	28.5	26.951	26.883	30.551	32.8237	26.7727	28.7563
2018-01-28 13:11:01	28	29.006	28.319	29	27.201	27.07	31.0717	33.1987	27.21	28.9853
2018-01-28 13:41:01	29.5	32.564	28.881	29.5	27.451	27.32	31.6133	34.1773	27.4807	29.4227
2018-01-28 14:11:01	32	37.24	28.944	29	27.701	27.383	32.134	34.198	27.7723	29.5267
2018-01-28 14:41:01	34	39.234	28.819	28	27.826	27.383	33.1127	36.1973	28.2307	30.214
2018-01-28 15:11:01	36.5	39.981	28.694	27.5	27.951	27.445	33.6957	36.4053	28.522	30.4847
2018-01-28 15:41:01	37.5	38.486	28.569	27.5	27.951	27.383	33.6747	34.2817	28.7097	29.5477
2018-01-28 16:11:01	37	35.557	28.444	27	28.076	27.383	33.2167	32.8867	28.522	29.0063
2018-01-28 16:41:01	37	32.876	28.319	27	28.076	27.32	33.1957	32.8037	28.522	29.173
2018-01-28 17:11:01	36.5	31.254	28.132	26.5	28.076	27.195	32.7377	31.6583	28.522	28.694
2018-01-28 17:41:01	35	29.943	28.007	26.5	28.076	27.258	32.5503	30.659	28.4597	28.1733
2018-01-28 18:11:01	34	29.319	27.882	26.5	28.013	27.195	32.0507	29.7637	28.3973	27.715
2018-01-28 18:41:01	33	28.881	27.695	26	27.951	27.133	31.53	29.014	28.0013	27.257
2018-01-28 19:11:01	32	28.444	27.507	26	27.826	27.133	30.9887	28.2433	27.939	26.9237
2018-01-28 19:41:01	31.5	28.007	27.32	26	27.701	27.07	30.468	27.5143	27.5017	26.4237
2018-01-28 20:11:01	30.5	27.757	27.195	25.5	27.576	26.883	29.9263	26.7647	27.4183	25.9237
2018-01-28 20:41:01	30	27.507	26.945	25.5	27.451	26.883	29.4057	26.0563	26.981	25.3823
2018-01-28 21:11:01	29.5	27.32	26.82	25.5	27.263	26.695	28.885	25.515	26.5433	24.8823
2018-01-28 21:41:01	29	27.07	26.633	25.5	27.139	26.57	28.385	25.015	26.4393	24.403
2018-01-28 22:11:01	28.5	26.883	26.508	25.5	27.014	26.508	27.8853	24.7233	26.002	23.9657
2018-01-28 22:41:01	28	26.695	26.383	25	26.889	26.445	27.427	24.4733	25.9187	23.8823
2018-01-28 23:11:01	27.5	26.633	26.32	25	26.826	26.445	26.9687	24.39	25.502	23.653
2018-01-28 23:41:01	27.5	26.695	26.195	25	26.701	26.383	26.8437	24.3483	25.4187	23.4447
2018-01-29 00:11:01	27	26.57	26.07	25	26.576	26.32	26.427	24.3273	25.377	23.6323
2018-01-29 00:41:01	27	26.383	26.008	25	26.514	26.258	26.3437	24.119	24.981	23.4237
2018-01-29 01:11:01	26.5	26.383	25.945	25	26.451	26.195	25.927	24.0983	24.9393	23.403
2018-01-29 01:41:01	26.5	26.383	25.883	25	26.326	26.133	25.8647	24.0773	24.877	23.403
2018-01-29 02:11:01	26.5	26.258	25.82	25	26.264	26.07	25.448	23.869	24.502	23.3403
2018-01-29 02:41:01	26	26.258	25.695	25	26.201	26.07	25.3853	23.8483	24.4393	23.3197
2018-01-29 03:11:01	26	26.258	25.633	25	26.076	26.008	25.323	23.8067	24.3977	23.132
2018-01-29 03:41:01	26	26.07	25.508	25	26.014	25.883	24.927	23.5983	24.0227	22.9237
2018-01-29 04:11:01	25.5	25.945	25.383	24.5	25.889	25.758	24.8647	23.39	23.981	22.903
2018-01-29 04:41:01	25.5	25.758	25.32	24.5	25.826	25.695	24.6353	23.3483	23.9393	22.8403
2018-01-29 05:11:01	25.5	25.695	25.195	24.5	25.701	25.57	24.4063	23.119	23.7103	22.632
2018-01-29 05:41:01	25	25.57	25.07	24.5	25.576	25.508	24.3437	22.89	23.502	22.4027
2018-01-29 06:11:01	25	25.445	25.008	24.5	25.514	25.445	23.948	22.8483	23.4603	22.361
2018-01-29 06:41:01	25	25.383	24.945	24.5	25.389	25.383	23.8853	22.8067	23.4187	22.3403
2018-01-29 07:11:01	24.5	25.258	25.008	24.5	25.451	25.445	23.8647	22.8273	23.2103	22.3403
2018-01-29 07:41:01	24.5	25.508	25.133	25	25.451	25.633	23.8647	23.265	23.2103	22.4237
2018-01-29 08:11:01	25	25.82	25.258	25.5	25.576	25.758	23.9063	23.8067	23.2103	22.882
2018-01-29 08:41:01	25	26.133	25.508	26	25.701	26.008	24.3647	25.4317	23.4393	23.799
2018-01-29 09:11:01	25	26.32	25.945	26.5	25.889	26.195	25.1353	27.41	23.6893	24.9863
2018-01-29 09:41:01	25.5	26.508	26.57	27.5	26.139	26.445	26.1147	29.3047	24.2103	26.528
2018-01-29 10:11:01	25.5	26.82	27.133	28	26.389	26.633	27.1977	31.2407	24.9393	28.236
2018-01-29 10:41:01	26	27.258	27.695	28.5	26.639	26.883	28.2183	32.677	25.4603	28.923
2018-01-29 11:11:01	26.5	27.757	28.257	29	26.826	27.07	29.01	33.114	25.9603	29.3813
2018-01-29 11:41:01	27	28.195	28.757	30.5	27.014	27.195	30.0097	34.0093	26.46	29.9017
2018-01-29 12:11:01	27.5	28.444	29.756	32	27.388	27.508	30.5927	34.1967	26.7517	29.9433
2018-01-29 12:41:01	28	28.569	30.754	32	27.638	27.82	31.9883	36.0493	27.2307	30.4013
2018-01-29 13:11:01	28	28.632	31.566	31.5	27.951	27.945	33.529	38.8173	27.939	31.4217
2018-01-29 13:41:01	30	33.25	31.503	31.5	28.138	27.945	35.07	40.378	28.5013	31.942
2018-01-29 14:11:01	31.5	35.994	31.378	30.5	28.325	27.882	36.1943	40.6907	29.001	31.817
2018-01-29 14:41:01	33.5	38.237	31.066	29.5	28.513	27.882	37.2143	40.941	29.4593	31.7753
2018-01-29 15:11:01	35.5	38.922	30.754	29	28.575	27.882	37.256	38.7557	29.5423	31.2343
2018-01-29 15:41:01	37	38.922	30.567	28.5	28.325	28.882	36.9437	37.2787	29.5217	30.5263
2018-01-29 16:11:01	36.5	37.302	30.38	28	28.825	28.007	36.7147	36.0507	29.5423	30.2557
2018-01-29 16:41:01	37	34.248	30.068	27.5	28.763	27.633	36.444	35.0517	29.5423	30.1723
2018-01-29 17:11:01	36.5	32.377	29.818	27	28.638	27.383	35.757	33.8443	29.5217	29.7143
2018-01-29 17:41:01	35.5	30.817	29.568	27	28.575	27.258	35.1947	32.4703	29.48	29.2147
2018-01-29 18:11:01	34.5	30.068	29.319	27	28.45	27.32	34.6327	31.6793	29.4383	28.7147
2018-01-29 18:41:01	33.5	29.568	29.006	26.5	28.263	27.32	34.0707	30.7423	29.0427	28.2357
2018-01-29 19:11:01	32.5	28.944	28.757	26.5	28.076	27.258	33.4877	29.576	28.9593	27.6943
2018-01-29 19:41:01	31.5	28.444	28.507	26.5	27.951	27.07	32.5503	28.5557	28.5013	26.9443
2018-01-29 20:11:01	31	27.945	28.319	26	27.826	27.008	31.9673	27.7643	28.2307	26.382
2018-01-29 20:41:01	30	27.695	28.07	26	27.638	26.945	31.405	27.0563	27.9597	25.903
2018-01-29 21:11:01	29.5	27.445	27.82	26	27.513	26.758	30.6763	26.7023	27.5223	25.424
2018-01-29 21:41:01	29	27.258	27.632	25.5	27.326	26.633	30.1557	26.2023	27.4183	25.153
2018-01-29 22:11:01	28.5	27.07	27.445	25.5	27.201	26.57	29.4473	25.7233	27.0017	24.8823
2018-01-29 22:41:01	28.5	26.883	27.258	25.5	27.014	26.508	28.9473	25.4317	26.731	24.424
2018-01-29 23:11:01	28	26.758	27.07	25.5	26.951	26.445	28.635	25.1817	26.46	24.3613
2018-01-29 23:41:01	27.5	26.633	26.945	25.5	26.826	26.32	28.3227	25.119	26.231	24.3197
2018-01-30 00:11:01	27.5	26.445	26.758	25	26.701	26.258	27.8643	24.869	25.981	23.9447
2018-01-30 00:41:01	27	26.32	26.633	25	26.576	26.195	27.3853	24.619	25.731	23.8823
2018-01-30 01:11:01	27	26.258	26.508	25	26.514	26.195	27.1143	24.39	25.502	23.8197
2018-01-30 01:41:01	26.5	26.258	26.383	25	26.389	26.07	26.8437	24.3483	25.4393	23.799
2018-01-30 02:11:01	26.5	26.133	26.258	25	26.264	26.008	26.4063	24.119	25.0227	23.403
2018-01-30 02:41:01	26	26.008	26.133	25	26.201	25.883	26.323	24.0773	24.981	23.382
2018-01-30 03:11:01	26	25.883	26.008	24.5	26.076	25.758	25.9063	24.0357	24.9187	23.3613
2018-01-30 03:41:01	26	25.758	25.883	24.5	25.951	25.695	25.802	23.8273	24.5227	23.3197
2018-01-30 04:11:01	25.5	25.633	25.758	24.5	25.826	25.57	25.4063	23.619	24.481	22.9447
2018-01-30 04:41:01	25.5	25.508	25.633	24.5	25.764	25.508	25.323	23.5567	24.4187	22.903
2018-01-30 05:11:01	25	25.445	25.508	24.5	25.639	25.383	24.9063	23.3273	24.0227	22.8403
2018-01-30 05:41:01	25	25.32	25.383	24	25.514	25.32	24.823	23.0983	23.9603	22.4443
2018-01-30 06:11:01	25	25.195	25.258	24	25.389	25.195	24.4063	22.869	23.731	22.4027
2018-01-30 06:41:01	24.5	25.07	25.195	24	25.326	25.195	24.3437	22.8273	23.5227	22.3403
2018-01-30 07:11:01	24.5	25.07	25.195	24.5	25.389	25.258	24.302	22.8483	23.481	22.3403
2018-01-30 07:41:01	24.5	25.258	25.32	25	25.451	25.445	24.323	23.4107	23.4603	22.7777
2018-01-30 08:11:01	24.5	25.57	25.383	25	25.514	25.57	24.3647	24.39	23.481	23.2987
2018-01-30 08:41:01	25	25.758	25.695	26	25.639	25.758	25.073	26.3063	23.7103	24.3197
2018-01-30 09:11:01	25	26.008	26.133	27	25.826	25.945	25.8853	28.4093	24.002	25.6113
2018-01-30 09:41:01	25	26.32	26.695	28	26.076	26.133	26.8853	30.1373	24.481	27.0903
2018-01-30 10:11:01	25.5	26.82	27.32	29	26.264	26.32	27.8853	31.7613	24.981	28.1523
2018-01-30 10:41:01	26	27.383	27.757	29.5	26.514	26.508	28.739	32.7603	25.4603	28.9437
2018-01-30 11:11:01	26.5	27.82	28.632	35	26.826	26.758	29.739	33.7387	25.9393	29.4643
2018-01-30 11:41:01	27	27.757	29.693	35	27.139	27.008	31.2177	35.799	26.46	30.464
2018-01-30 12:11:01	27.5	28.195	30.255	35	27.326	27.133	31.9257	34.965	27.6267	30.922
2018-01-30 12:41:01	28	28.569	31.316	37.5	27.576	27.258	33.134	35.572	27.6267	30.9013
2018-01-30 13:11:01	28	28.382	32.19	36.5	27.826	27.445	34.3417	37.8403	27.918	31.401
2018-01-30 13:41:01	30	34.747	32.127	33	28.013	27.57	35.3203	38.6513	28.3973	31.8797
2018-01-30 14:11:01	32	37.676	32.002	31	28.138	27.695	36.2783	39.7743	28.6887	32.046
2018-01-30 14:41:01	34.5	39.545	31.628	29.5	28.263	27.57	37.0487	39.8153	29.126	32.046
2018-01-30 15:11:01	36	40.915	31.378	29.5	28.325	27.633	37.4023	39.2943	29.3967	32.0253
2018-01-30 15:41:01	37.5	40.292	31.066	28.5	28.388	27.633	37.569	38.026	29.4383	31.5047
2018-01-30 16:11:01	38	38.86	30.879	28.5	28.45	27.633	37.6107	36.8607	29.6677	31.255
2018-01-30 16:41:01	37.5	34.809	30.567	28	28.45	27.633	37.1943	35.841	29.855	31.026
2018-01-30 17:11:01	36.5	32.502	30.317	28	28.388	27.57	36.6943	34.343	29.8757	30.2973
2018-01-30 17:41:01	35.5	30.942	30.005	27.5	28.325	27.508	36.1533	32.8863	29.5217	29.735
2018-01-30 18:11:01	34.5	30.255	29.693	27	28.263	27.445	35.2577	31.6167	29.4593	29.1937
2018-01-30 18:41:01	33.5	29.506	29.443	27	28.138	27.32	34.529	30.513	29.3967	28.298
2018-01-30 19:11:01	32.5	29.006	29.194	26.5	28.013	27.258	33.9667	29.472	28.9803	27.736
2018-01-30 19:41:01	32	28.507	28.944	26.5	27.888	27.195	33.0713	28.8473	28.8763	27.2153
2018-01-30 20:11:01	31	28.07	28.694	26.5	27.763	27.07	32.5297	28.0977	28.4597	26.6947
2018-01-30 20:41:01	30.5	27.757	28.444	26	27.638	26.883	31.8217	27.3897	28.0223	26.2153
2018-01-30 21:11:01	30	27.507	28.195	26	27.513	26.82	31.301	26.8897	27.918	25.9237
2018-01-30 21:41:01	29.5	27.32	28.007	26	27.388	26.758	30.7803	26.5773	27.5017	25.4657
2018-01-30 22:11:01	29	27.195	27.82	26	27.263	26.695	30.2807	26.3063	27.4183	25.3823
2018-01-30 22:41:01	28.5	27.133	27.695	26	27.201	26.695	29.8013	25.89	27.0017	25.153
2018-01-30 23:11:01	28	27.07	27.507	26	27.139	26.633	29.3223	25.8273	26.9393	24.9447
2018-01-30 23:41:01	28	26.945	27.383	26	27.076	26.57	28.885	25.8067	26.71	24.903
2018-01-31 00:11:01	27.5	26.945	27.32	26	26.951	26.633	28.76	25.7857	26.481	24.8823
2018-01-31 00:41:01	27.5	26.883	27.195	26	26.889	26.633	28.515	25.5773	26.4393	24.8613
2018-01-31 01:11:01	27.5	26.82	27.07	26	26.826	26.57	28.109	25.5357	26.3767	24.8407
2018-01-31 01:41:01	27	26.758	26.945	25.5	26.764	26.508	27.984	25.494	26.002	24.799
2018-01-31 02:11:01	27	26.695	26.883	25.5	26.701	26.445	27.609	25.494	25.9603	24.6323
2018-01-31 02:41:01	26.5	26.57	26.758	25.5	26.639	26.383	27.5155	25.3067	25.9187	24.6113
2018-01-31 03:11:01	26.5	26.508	26.695	25.5	26.576	26.32	27.1405	25.0983	25.7103	24.424
2018-01-31 03:41:01	26.5	26.445	26.57	25.5	26.451	26.195	27.0155	25.0357	25.502	24.3823
2018-01-31 04:11:01	26	26.32	26.445	25.5	26.326	26.133	26.6405	24.8067	25.4603	24.3197
2018-01-31 04:41:01	26	26.195	26.32	25	26.264	26.008	26.5155	24.5357	25.3977	24.0907
2018-01-31 05:11:01	26	26.008	26.195	25	26.139	25.945	26.172	24.3273	25.0227	23.8823
2018-01-31 05:41:01	26	25.945	26.07	25	26.076	25.883	26.047	24.119	24.981	23.8407
2018-01-31 06:11:01	25.5	25.883	26.008	25	26.014	25.883	25.953	24.0773	24.9393	23.8197
2018-01-31 06:41:01	25.5	25.883	25.945	25	26.014	25.883	25.6405	24.0773	24.731	23.799
2018-01-31 07:11:01	25.5	26.008	26.008	25.5	26.076	25.945	25.6095	24.2857	24.7103	23.799
2018-01-31 07:41:01	25.5	26.258	26.07	26	26.139	26.07	25.578	24.744	24.6893	23.8823
2018-01-31 08:11:01	25.5	26.445	26.258	26.5	26.201	26.195	25.6405	25.4317	24.7103	24.3407
2018-01-31 08:41:01	25.5	26.695	26.508	27	26.326	26.383	25.9845	26.1817	24.731	25.028
2018-01-31 09:11:01	26	27.07	26.883	27.5	26.514	26.445	26.453	27.9937	24.9393	25.8407
2018-01-31 09:41:01	26	27.258	27.32	28.5	26.701	26.695	26.9845	29.3473	25.231	26.8403
2018-01-31 10:11:01	26.5	27.383	28.07	30.5	27.014	27.008	27.484	29.9303	25.6477	27.382
2018-01-31 10:41:01	26.5	27.82	28.819	31.5	27.326	27.32	28.765	32.8873	25.9603	28.8813
2018-01-31 11:11:01	27	28.444	29.818	36.5	27.763	27.695	30.546	36.0517	26.6893	30.443
2018-01-31 11:41:01	27.5	28.757	31.254	38	28.138	27.945	32.045	37.8417	27.4183	31.4633
2018-01-31 12:11:01	28	28.632	32.377	39	28.513	28.132	33.638	39.6933	28.1473	32.4417
2018-01-31 12:41:01	28.5	28.632	33.188	39.5	28.763	28.32	35.168	40.4417	28.6887	32.5457
2018-01-31 13:11:01	29	29.131	33.001	34.5	28.763	28.195	36.4485	40.1083	29.2093	32.504
2018-01-31 13:41:01	30	31.378	32.814	32	28.888	28.132	36.698	38.006	29.6467	31.817
2018-01-31 14:11:01	30.5	32.377	32.626	31	29.013	28.195	36.7295	36.8827	29.709	31.2343
2018-01-31 14:41:01	32	35.433	32.314	30	29.013	28.195	36.3235	35.4677	29.73	30.318
2018-01-31 15:11:01	33	34.186	31.878	29	29.013	28.07	36.698	36.258	29.9173	30.693
2018-01-31 15:41:01	33.5	34.061	31.566	29	29.013	28.007	36.7295	35.654	29.959	30.672
2018-01-31 16:11:01	33	31.878	31.191	28.5	28.95	27.945	36.23	34.177	29.9383	30.214
2018-01-31 16:41:01	32.5	30.38	30.879	28	28.888	27.82	35.73	33.199	29.8967	29.735
2018-01-31 17:11:01	32	29.693	30.692	28	28.825	27.82	35.2305	32.387	29.501	29.2977
2018-01-31 17:41:01	31.5	29.693	30.442	28	28.825	27.82	34.7935	31.9083	29.48	29.2147
2018-01-31 18:11:01	31	29.256	30.13	27.5	28.763	27.757	34.2935	31.138	29.4177	28.7563
2018-01-31 18:41:01	30.5	28.881	29.818	27	28.638	27.633	33.8255	30.6173	29.376	28.4857
2018-01-31 19:11:01	30.5	28.319	29.568	27	28.575	27.57	33.3255	29.847	28.9803	28.0067
2018-01-31 19:41:01	30	28.007	29.319	27	28.45	27.57	32.7635	29.0767	28.897	27.6733
2018-01-31 20:11:01	29.5	27.882	29.131	27	28.325	27.57	32.014	28.3477	28.5013	27.1737
2018-01-31 20:41:01	29	27.757	28.944	26.5	28.201	27.508	31.483	27.8477	28.418	26.7153
2018-01-31 21:11:01	29	27.632	28.757	26.5	28.076	27.445	31.0145	27.723	28.0013	26.4447
2018-01-31 21:41:01	28.5	27.507	28.569	26.5	27.951	27.32	30.5455	27.2853	27.939	26.1947
2018-01-31 22:11:01	28.5	27.383	28.382	26.5	27.888	27.258	30.327	26.848	27.689	25.9653
2018-01-31 22:41:01	28	27.195	28.132	26	27.763	27.133	29.89	26.744	27.46	25.7157
2018-01-31 23:11:01	28	27.008	27.945	26	27.576	27.008	29.421	26.2857	27.3767	25.4447
2018-01-31 23:41:01	27.5	26.82	27.695	25.5	27.451	26.758	28.9525	25.8067	26.96	25.174
2018-02-01 00:11:01	27.5	26.633	27.507	25.5	27.263	26.633	28.484	25.3483	26.8767	24.7157
2018-02-01 00:41:01	27	26.445	27.32	25.5	27.139	26.508	28.0465	25.244	26.4393	24.4447
2018-02-01 01:11:01	27	26.32	27.133	25.5	26.951	26.383	27.609	24.8067	26.356	24.1947
2018-02-01 01:41:01	26.5	26.133	26.945	25	26.826	26.32	27.4215	24.5567	25.9393	23.9657
2018-02-01 02:11:01	26.5	26.008	26.758	25	26.701	26.133	26.9845	24.3067	25.877	23.8823
2018-02-01 02:41:01	26	25.883	26.57	25	26.514	26.07	26.578	24.0567	25.4603	23.653
2018-02-01 03:11:01	26	25.695	26.445	25	26.389	26.008	26.422	23.8273	25.377	23.403
2018-02-01 03:41:01	25.5	25.633	26.258	24.5	26.264	25.945	26.0155	23.5773	24.981	23.1737
2018-02-01 04:11:01	25.5	25.508	26.133	24.5	26.139	25.82	25.6095	23.494	24.8977	22.9447
2018-02-01 04:41:01	25.5	25.445	26.008	24.5	26.014	25.695	25.453	23.0983	24.502	22.882
2018-02-01 05:11:01	25	25.258	25.82	24.5	25.889	25.633	25.078	23.0357	24.4187	22.653
2018-02-01 05:41:01	25	25.258	25.695	24.5	25.764	25.508	24.953	22.8067	24.0227	22.4237
2018-02-01 06:11:01	25	25.195	25.57	24	25.639	25.445	24.578	22.5773	23.9603	22.382
2018-02-01 06:41:01	24.5	25.008	25.445	24	25.576	25.383	24.453	22.5147	23.8977	22.3193
2018-02-01 07:11:01	24.5	25.07	25.508	24.5	25.576	25.508	24.1095	22.5147	23.502	22.2987
2018-02-01 07:41:01	24.5	25.195	25.508	25	25.701	25.633	24.078	22.9523	23.481	22.382
2018-02-01 08:11:01	24.5	25.383	25.633	25.5	25.826	25.82	24.453	24.4733	23.502	23.132
2018-02-01 08:41:01	24.5	25.695	25.945	26	26.014	26.133	25.2655	26.7023	23.8977	24.528
2018-02-01 09:11:01	25	26.008	26.383	27.5	26.326	26.445	26.203	29.0147	24.1893	25.8613
2018-02-01 09:41:01	25	26.32	27.07	29	26.701	26.82	27.172	31.014	24.6893	27.382
2018-02-01 10:11:01	25.5	26.758	27.945	30.5	27.139	27.258	28.2965	33.3877	25.3977	29.069
2018-02-01 10:41:01	25.5	27.133	28.757	32	27.576	27.57	29.671	35.1367	26.127	30.1723
2018-02-01 11:11:01	26	27.383	29.943	38	28.013	27.945	31.1705	37.2807	26.6893	31.255
2018-02-01 11:41:01	26.5	27.757	31.441	40	28.45	28.32	32.7635	39.5077	27.6057	32.275
2018-02-01 12:11:01	27	28.132	32.751	41.5	28.825	28.632	34.606	41.2133	28.189	33.2327
2018-02-01 12:41:01	27.5	28.444	34.061	41.5	29.2	28.882	36.1675	42.399	29.022	33.7737
2018-02-01 13:11:01	28	28.757	34.809	38.5	29.512	29.069	37.6035	42.9803	29.5217	34.0443
2018-02-01 13:41:01	30	34.186	34.56	33.5	29.637	29.444	38.915	42.958	30.0007	34.065
2018-02-01 14:11:01	32.5	42.222	33.624	31.5	29.575	29.194	39.6015	42.7907	30.4587	34.1273
2018-02-01 14:41:01	35.5	43.528	33.188	30	29.7	29.069	40.4445	42.54	30.7293	33.857
2018-02-01 15:11:01	38	43.964	32.751	29	29.7	28.882	40.8815	41.7077	30.9793	33.524
2018-02-01 15:41:01	39	43.155	32.439	29	29.762	28.82	41.0375	40.667	31.396	33.524
2018-02-01 16:11:01	40	40.977	32.002	28.5	29.7	28.632	40.476	37.589	31.396	32.5663
2018-02-01 16:41:01	39	34.747	31.628	28	29.575	28.445	39.5705	35.259	31.021	31.2967
2018-02-01 17:11:01	37	32.314	31.254	28	29.512	28.32	38.6025	33.5943	30.917	30.2973
2018-02-01 17:41:01	36	31.191	30.879	27.5	29.387	28.257	37.697	32.4493	30.5003	29.735
2018-02-01 18:11:01	35	30.255	30.505	27.5	29.2	28.132	36.823	31.4087	30.4173	29.2147
2018-02-01 18:41:01	33.5	29.568	30.193	27	29.075	28.007	35.9175	30.5967	30.0007	28.694
2018-02-01 19:11:01	32.5	29.131	29.88	27	28.95	27.945	35.043	29.8053	29.8967	28.215
2018-02-01 19:41:01	32	28.757	29.568	27	28.825	27.82	34.45	29.2847	29.48	27.9233
2018-02-01 20:11:01	31.5	28.444	29.319	26.5	28.7	27.757	33.6375	28.7433	29.3967	27.4443
2018-02-01 20:41:01	30.5	28.257	29.069	26.5	28.575	27.695	33.0755	28.077	28.9593	27.1527
2018-02-01 21:11:01	30.5	28.195	28.881	26.5	28.513	27.633	32.5135	27.7853	28.8763	26.882
2018-02-01 21:41:01	30	27.945	28.694	26.5	28.388	27.57	32.014	27.5353	28.4387	26.4653
2018-02-01 22:11:01	29.5	27.695	28.507	26.5	28.201	27.445	31.514	27.2853	28.3763	26.403
2018-02-01 22:41:01	29	27.32	28.257	26	28.013	27.258	31.0145	27.0147	27.9597	26.153
2018-02-01 23:11:01	28.5	27.07	28.07	26	27.826	27.133	30.5145	26.5147	27.689	25.6947
2018-02-01 23:41:01	28	26.883	27.82	25.5	27.701	26.945	30.0145	26.015	27.4183	25.3823
2018-02-02 00:11:01	28	26.695	27.632	25.5	27.513	26.82	29.265	25.5357	26.981	24.924
2018-02-02 00:41:01	27.5	26.445	27.383	25.5	27.326	26.695	29.015	25.0773	26.8767	24.4863
2018-02-02 01:11:01	27	26.258	27.195	25	27.139	26.57	28.5465	24.619	26.4393	24.3613
2018-02-02 01:41:01	27	26.32	27.008	25	26.951	26.445	28.078	24.515	26.0227	23.9447
2018-02-02 02:11:01	26.5	26.258	26.82	25	26.826	26.383	27.6405	24.3067	25.9187	23.8823
2018-02-02 02:41:01	26.5	26.195	26.633	25	26.701	26.32	27.234	24.2857	25.5227	23.8613
2018-02-02 03:11:01	26	26.008	26.508	24.5	26.514	26.195	27.047	24.0567	25.4393	23.4657
2018-02-02 03:41:01	26	25.82	26.32	24.5	26.389	26.07	26.6405	23.8067	25.377	23.403
2018-02-02 04:11:01	25.5	25.758	26.195	24.5	26.201	26.008	26.2345	23.744	24.9603	23.3403
2018-02-02 04:41:01	25.5	25.57	26.008	24.5	26.139	25.883	26.078	23.3483	24.877	22.9447
2018-02-02 05:11:01	25	25.57	25.883	24.5	26.014	25.883	25.703	23.2857	24.481	22.882
2018-02-02 05:41:01	25	25.445	25.758	24.5	25.889	25.758	25.547	23.244	24.4187	22.8403
2018-02-02 06:11:01	25	25.383	25.633	24	25.764	25.695	25.172	23.0357	24.0227	22.632
2018-02-02 06:41:01	25	25.258	25.57	24.5	25.701	25.633	25.078	23.015	23.9603	22.4443
2018-02-02 07:11:01	24.5	25.32	25.508	24.5	25.639	25.695	24.7345	23.0357	23.9187	22.611
2018-02-02 07:41:01	24.5	25.508	25.633	25	25.701	25.82	24.703	23.4733	23.8977	22.8403
2018-02-02 08:11:01	24.5	25.695	25.758	25.5	25.764	26.008	24.703	23.9733	23.8977	23.278
2018-02-02 08:41:01	25	26.07	26.195	26.5	25.951	26.258	25.422	26.5357	23.9393	24.1323
2018-02-02 09:11:01	25	26.383	26.82	27.5	26.201	26.633	26.328	29.4937	24.3977	25.8407
2018-02-02 09:41:01	25.5	26.758	27.57	28.5	26.514	26.945	27.609	32.2217	24.9187	27.7983
2018-02-02 10:11:01	25.5	27.07	28.257	29	26.889	27.195	28.6715	34.2413	25.6687	29.3603
2018-02-02 10:41:01	26	27.445	28.569	29	27.139	27.258	30.015	35.6987	26.3977	30.4013
2018-02-02 11:11:01	26.5	27.945	29.506	29.5	27.388	27.383	30.9835	35.5313	26.9393	30.9013
2018-02-02 11:41:01	27	28.569	30.754	33	27.701	27.695	31.9205	36.7393	27.439	30.9637
2018-02-02 12:11:01	27.5	28.694	32.377	34	28.076	28.07	33.482	39.507	28.168	31.942
2018-02-02 12:41:01	28	28.507	33.936	33.5	28.513	28.32	35.0435	41.0047	28.7303	32.6707
2018-02-02 13:11:01	28.5	28.569	34.497	34	28.825	28.507	36.511	41.9403	29.4383	32.962
2018-02-02 13:41:01	31	38.548	34.123	32.5	29.075	28.57	38.0095	42.376	29.9383	33.441
2018-02-02 14:11:01	34.5	42.844	33.874	30.5	29.262	28.632	38.884	42.396	30.4173	32.8997
2018-02-02 14:41:01	37	44.213	33.313	30	29.387	28.632	39.6955	41.876	30.4797	32.4
2018-02-02 15:11:01	39	43.902	32.876	29	29.512	28.695	40.1015	40.524	30.542	31.9213
2018-02-02 15:41:01	40	42.408	32.564	29	29.637	28.757	40.2265	39.089	30.917	31.6507
2018-02-02 16:11:01	40.5	39.732	32.252	29	29.637	28.632	40.0075	37.5907	30.9377	31.38
2018-02-02 16:41:01	40	34.373	32.065	29	29.7	28.757	39.1335	35.4053	30.7293	30.693
2018-02-02 17:11:01	39	33.25	31.628	28.5	29.637	28.507	38.228	33.9697	30.5213	30.1723
2018-02-02 17:41:01	37.5	32.19	31.254	28	29.637	28.445	37.2915	32.4083	30.438	29.4643
2018-02-02 18:11:01	36.5	31.129	31.004	28	29.575	28.32	36.448	31.867	30.209	29.173
2018-02-02 18:41:01	35	30.442	30.63	27.5	29.45	28.195	35.824	30.909	29.98	28.7147
2018-02-02 19:11:01	34	29.568	30.317	27	29.325	28.132	34.9495	30.118	29.73	28.4023
2018-02-02 19:41:01	33	29.069	30.005	27	29.137	28.007	34.0435	29.3473	29.48	27.9443
2018-02-02 20:11:01	32	28.444	29.693	26.5	28.95	27.757	33.169	28.3477	29.0427	27.257
2018-02-02 20:41:01	31.5	28.132	29.319	26.5	28.7	27.57	32.5445	27.3897	28.751	26.5693
2018-02-02 21:11:01	30.5	27.695	29.006	26	28.513	27.383	31.67	26.8273	28.4597	26.0487
2018-02-02 21:41:01	30	27.32	28.757	26	28.263	27.195	31.0765	26.3067	28.0013	25.549
2018-02-02 22:11:01	29.5	27.258	28.444	25.5	28.076	27.07	30.5145	25.8273	27.7307	25.2573
2018-02-02 22:41:01	29	27.008	28.132	25.5	27.888	26.945	29.7335	25.369	27.439	24.9657
2018-02-02 23:11:01	28.5	26.945	27.882	25.5	27.701	26.82	29.2025	25.119	27.0017	24.549
2018-02-02 23:41:01	28	26.82	27.632	25	27.451	26.758	28.734	25.0983	26.7517	24.4863
2018-02-03 00:11:01	27.5	26.633	27.445	25	27.326	26.633	28.5465	25.119	26.5017	24.4657
2018-02-03 00:41:01	27	26.07	27.258	25	27.139	26.633	28.109	25.119	26.2727	24.4447
2018-02-03 01:11:01	27	26.32	27.133	25	27.014	26.57	27.6715	24.7023	26.0227	24.3823
2018-02-03 01:41:01	26.5	26.258	26.945	25	26.889	26.445	27.2655	24.64	25.9603	24.0073
2018-02-03 02:11:01	26.5	26.133	26.758	25	26.764	26.383	27.078	24.4107	25.7103	23.9447
2018-02-03 02:41:01	26	26.008	26.633	25	26.639	26.32	26.672	24.1607	25.4603	23.6947
2018-02-03 03:11:01	26	25.82	26.445	25	26.514	26.258	26.2655	23.9523	25.231	23.4863
2018-02-03 03:41:01	26	25.883	26.32	24.5	26.389	26.133	26.1405	23.9107	25.002	23.4447
2018-02-03 04:11:01	25.5	25.695	26.195	24.5	26.264	26.07	25.7655	23.7233	24.7727	23.403
2018-02-03 04:41:01	25.5	25.758	26.07	24.5	26.139	26.008	25.6405	23.6607	24.7103	23.3613
2018-02-03 05:11:01	25.5	25.758	25.945	24.5	26.014	25.883	25.2655	23.4523	24.481	22.9863
2018-02-03 05:41:01	25	25.633	25.758	24.5	25.951	25.758	25.1405	23.4317	24.2727	22.9447
2018-02-03 06:11:01	25	25.508	25.695	24	25.826	25.758	24.797	23.2023	24.2103	22.903
2018-02-03 06:41:01	24.5	25.445	25.57	24.5	25.764	25.695	24.703	23.015	24.002	22.8613
2018-02-03 07:11:01	24.5	25.445	25.57	24.5	25.701	25.82	24.6095	23.2023	23.9603	22.8403
2018-02-03 07:41:01	24.5	25.758	25.633	25	25.701	25.883	24.8595	23.6607	23.7727	23.1113
2018-02-03 08:11:01	25	26.008	25.82	26	25.764	26.133	25.2655	25.1817	23.9603	24.0073
2018-02-03 08:41:01	25	26.195	26.195	26.5	25.951	26.32	26.3905	27.4523	24.1893	25.0073
2018-02-03 09:11:01	25	26.57	26.82	28	26.201	26.633	27.672	29.8477	24.6687	26.632
2018-02-03 09:41:01	25.5	26.945	27.57	29	26.514	27.008	28.6715	32.055	25.2103	28.111
2018-02-03 10:11:01	26	27.32	28.07	29	26.764	27.133	29.984	33.7203	25.9187	29.548
2018-02-03 10:41:01	26	28.132	28.632	29.5	27.076	27.32	30.171	32.825	26.1893	29.173
2018-02-03 11:11:01	27	28.132	30.38	30.5	27.451	27.757	31.858	35.844	26.8767	30.1727
2018-02-03 11:41:01	27.5	28.819	31.878	34.5	27.888	28.07	33.6385	38.8827	27.439	31.5887
2018-02-03 12:11:01	28	28.569	33.001	35	28.263	28.32	35.169	40.5883	28.168	32.13
2018-02-03 12:41:01	28	28.444	34.685	35	28.638	28.445	36.449	42.0233	28.8763	32.692
2018-02-03 13:11:01	28.5	28.694	35.059	34.5	28.888	28.507	37.9165	43.2913	29.3967	33.3997
2018-02-03 13:41:01	31.5	41.724	34.809	34	29.137	28.57	39.1025	43.9563	29.9173	34.066
2018-02-03 14:11:01	34.5	45.456	34.31	31	29.325	28.57	40.1015	43.8103	30.3963	33.941
2018-02-03 14:41:01	37	44.586	33.687	29.5	29.45	28.632	40.6635	42.604	30.8547	33.483
2018-02-03 15:11:01	39	43.839	33.188	29	29.512	28.695	41.038	41.502	30.9587	33.233
2018-02-03 15:41:01	40.5	41.786	32.751	29	29.575	28.632	41.194	40.233	31.3543	32.8373
2018-02-03 16:11:01	40.5	37.801	32.314	28.5	29.575	28.632	40.975	38.6727	31.396	32.3793
2018-02-03 16:41:01	39.5	33.313	31.94	28	29.575	28.507	40.3825	36.654	31.4167	31.838
2018-02-03 17:11:01	38.5	32.002	31.441	28	29.575	28.757	39.1645	34.6147	31.2083	30.922
2018-02-03 17:41:01	36.5	30.942	31.191	28	29.45	28.57	38.259	33.4283	30.9793	30.4223
2018-02-03 18:11:01	35.5	29.943	30.879	27.5	29.387	28.507	37.3535	32.4083	30.917	29.756
2018-02-03 18:41:01	34	29.568	30.63	27.5	29.325	28.445	36.698	31.159	30.5003	29.2147
2018-02-03 19:11:01	33.5	29.443	30.317	27.5	29.2	28.32	35.7615	30.118	30.3963	28.6523
2018-02-03 19:41:01	32.5	29.006	30.068	27.5	29.075	28.195	34.8245	29.0977	29.959	27.7567
2018-02-03 20:11:01	31.5	28.694	29.756	27	28.888	28.007	33.8875	28.306	29.48	27.2153
2018-02-03 20:41:01	31	28.507	29.568	27	28.763	27.882	33.013	27.5563	29.022	26.5487
2018-02-03 21:11:01	30.5	28.319	29.256	27	28.638	27.82	32.42	27.244	28.897	26.2363
2018-02-03 21:41:01	30	28.07	29.069	26.5	28.45	27.695	31.6075	26.8273	28.4597	25.9863
2018-02-03 22:11:01	29.5	28.07	28.819	26.5	28.325	27.57	31.0455	26.369	28.0223	25.549
2018-02-03 22:41:01	29	27.945	28.632	26.5	28.201	27.508	30.5145	26.119	27.918	25.4657
2018-02-03 23:11:01	29	27.695	28.444	26.5	28.076	27.445	30.0145	25.869	27.4807	25.403
2018-02-03 23:41:01	28.5	27.632	28.257	26.5	27.951	27.445	29.546	25.7023	27.2517	25.1947
2018-02-04 00:11:01	28.5	27.632	28.132	26.5	27.888	27.32	29.1085	25.7233	27.0017	25.174
2018-02-04 00:41:01	28	27.445	27.945	26	27.763	27.258	28.6715	25.6817	26.9393	24.9863
2018-02-04 01:11:01	28	27.32	27.82	26	27.638	27.133	28.515	25.619	26.71	24.9447
2018-02-04 01:41:01	27.5	27.195	27.632	26	27.576	27.07	28.109	25.4523	26.481	24.903
2018-02-04 02:11:01	27.5	27.195	27.57	26	27.451	27.07	27.734	25.4523	26.4393	24.903
2018-02-04 02:41:01	27	27.07	27.445	26	27.451	27.133	27.609	25.4317	26.21	24.8823
2018-02-04 03:11:01	27	27.383	27.383	26	27.326	27.07	27.234	25.2233	26.002	24.674
2018-02-04 03:41:01	27	27.32	27.32	26	27.263	26.945	27.109	24.994	25.9393	24.4657
2018-02-04 04:11:01	27	27.133	27.133	26	27.201	26.945	26.7345	24.9317	25.731	24.424
2018-02-04 04:41:01	26.5	27.008	27.133	26	27.139	26.945	26.6405	24.9523	25.5227	24.403
2018-02-04 05:11:01	26.5	27.133	27.008	26	27.076	26.883	26.578	24.9733	25.481	24.403
2018-02-04 05:41:01	26.5	26.945	26.945	26	27.014	26.82	26.2345	24.9523	25.4393	24.403
2018-02-04 06:11:01	26.5	26.883	26.883	26	26.889	26.82	26.1405	24.9107	25.231	24.3613
2018-02-04 06:41:01	26.5	27.008	26.758	26	26.889	26.82	26.078	24.9107	25.2103	24.3407
2018-02-04 07:11:01	26	27.008	26.633	26	26.826	26.82	26.047	24.994	25.0227	24.3823
2018-02-04 07:41:01	26	27.008	26.633	26	26.826	26.883	26.0155	25.244	25.0227	24.5907
2018-02-04 08:11:01	26	27.32	26.695	26.5	26.826	26.945	26.0155	25.4317	25.002	24.5907
2018-02-04 08:41:01	26.5	27.757	26.695	26.5	26.826	26.883	26.0155	25.4733	24.981	24.5907
2018-02-04 09:11:01	26.5	28.007	26.883	27	26.889	26.883	26.6095	26.6397	24.981	25.028
2018-02-04 09:41:01	26.5	28.507	27.133	27.5	26.951	27.07	26.7655	27.577	25.002	25.528
2018-02-04 10:11:01	27	28.819	27.383	28	27.014	27.195	27.203	28.5143	25.2103	26.0073
2018-02-04 10:41:01	27.5	27.32	27.82	29	27.201	27.258	27.9215	29.2017	25.4187	26.507
2018-02-04 11:11:01	27.5	28.382	28.319	29.5	27.388	27.445	28.734	31.0343	25.481	27.1737
2018-02-04 11:41:01	28	29.256	28.881	30	27.576	27.633	30.0465	33.8447	25.9393	28.361
2018-02-04 12:11:01	28.5	29.756	29.256	30.5	27.763	27.882	31.0145	34.9063	26.3977	28.9233
2018-02-04 12:41:01	29	30.193	30.068	31.5	28.013	28.07	32.2645	36.1967	26.856	29.8603
2018-02-04 13:11:01	29.5	30.63	31.316	33.5	28.325	28.257	33.701	38.777	27.3767	30.86
2018-02-04 13:41:01	32	37.053	31.753	33.5	28.638	28.382	34.513	39.1303	27.8973	31.547
2018-02-04 14:11:01	35.5	41.786	31.753	31	28.888	28.57	36.1995	41.0857	28.418	32.1507
2018-02-04 14:41:01	37.5	42.968	31.503	30	29.075	28.57	36.9485	40.378	28.9177	32.213
2018-02-04 15:11:01	38.5	41.911	31.254	29	29.2	28.507	37.604	39.65	29.3967	32.234
2018-02-04 15:41:01	40	42.533	31.004	28.5	29.262	28.445	38.2285	38.7557	29.855	32.234
2018-02-04 16:11:01	40	40.603	30.879	28.5	29.387	28.57	38.478	37.5907	29.959	31.7757
2018-02-04 16:41:01	38.5	35.807	30.692	28.5	29.387	28.632	38.072	35.4263	30.188	31.1093
2018-02-04 17:11:01	37.5	33.25	30.505	28.5	29.387	28.57	36.9165	33.22	29.98	30.1723
2018-02-04 17:41:01	36	31.878	30.317	28	29.387	28.507	36.011	31.617	29.9173	29.2353
2018-02-04 18:11:01	35	31.004	30.068	28	29.262	28.32	35.3555	30.5553	29.501	28.7147
2018-02-04 18:41:01	34	30.317	29.818	27.5	29.2	28.195	34.512	29.618	29.4383	28.215
2018-02-04 19:11:01	33	29.943	29.568	27.5	29.137	28.132	33.919	29.0767	29.022	27.736
2018-02-04 19:41:01	32.5	29.568	29.319	27	29.075	28.007	33.107	28.3893	28.9387	27.4443
2018-02-04 20:11:01	31.5	29.381	29.131	27	28.95	28.007	32.576	28.2853	28.8763	27.1737
2018-02-04 20:41:01	31	29.194	29.006	27	28.888	28.007	32.076	27.8687	28.4597	26.9443
2018-02-04 21:11:01	30.5	29.006	28.757	27	28.763	27.82	31.5765	27.598	28.3973	26.7153
2018-02-04 21:41:01	30	28.881	28.507	26.5	28.638	27.508	31.0765	27.1813	27.9807	26.4447
2018-02-04 22:11:01	30	28.632	28.257	26.5	28.513	27.445	30.608	27.119	27.918	26.403
2018-02-04 22:41:01	29.5	28.444	28.07	26.5	28.388	27.383	30.1395	26.723	27.5223	26.1737
2018-02-04 23:11:01	29	28.319	27.945	26.5	28.263	27.445	29.702	26.6607	27.46	25.9653
2018-02-04 23:41:01	28.5	28.257	27.882	26.5	28.201	27.445	29.265	26.619	27.3973	25.9237
2018-02-05 00:11:01	28.5	28.195	27.757	26.5	28.138	27.508	29.1085	26.4107	27.0017	25.8613
2018-02-05 00:41:01	28.5	28.132	27.632	26.5	28.013	27.32	28.734	26.2023	26.96	25.653
2018-02-05 01:11:01	28	28.007	27.445	26	27.888	27.07	28.5775	26.1817	26.731	25.4447
2018-02-05 01:41:01	28	27.82	27.008	25.5	27.701	26.82	28.1715	25.9733	26.5017	25.403
2018-02-05 02:11:01	27.5	27.57	26.695	25.5	27.513	26.758	27.703	25.619	26.3977	24.7573
2018-02-05 02:41:01	27	27.195	26.383	25	27.326	26.633	27.484	25.119	25.981	24.4447
2018-02-05 03:11:01	26.5	27.008	26.008	24.5	27.139	26.508	27.078	24.6817	25.8977	24.174
2018-02-05 03:41:01	26.5	26.82	25.82	24.5	26.951	26.445	26.672	24.64	25.481	23.924
2018-02-05 04:11:01	26	26.633	25.633	24.5	26.764	26.32	26.5155	24.4107	25.4187	23.6947
2018-02-05 04:41:01	26	26.508	25.508	24.5	26.639	26.195	26.1405	24.1817	25.0227	23.4657
2018-02-05 05:11:01	25.5	26.445	25.383	24.5	26.514	26.195	26.0155	23.9523	24.9393	23.403
2018-02-05 05:41:01	25.5	26.32	25.32	24.5	26.389	26.195	25.672	23.9107	24.7103	23.1947
2018-02-05 06:11:01	25.5	26.258	25.195	24.5	26.264	26.133	25.578	23.9107	24.502	23.153
2018-02-05 06:41:01	25.5	26.195	25.133	24.5	26.139	26.07	25.4845	23.89	24.4603	23.153
2018-02-05 07:11:01	25	26.195	25.133	24.5	26.076	26.07	25.422	23.9107	24.4187	23.132
2018-02-05 07:41:01	25	26.195	25.07	24.5	26.014	25.945	25.1405	23.994	24.2103	23.3197
2018-02-05 08:11:01	25	26.258	25.008	24.5	25.951	26.008	25.1095	24.39	24.0227	23.3403
2018-02-05 08:41:01	25	26.258	25.008	24.5	25.889	26.008	25.078	24.4317	24.002	23.3613
2018-02-05 09:11:01	25	26.383	25.008	25	25.889	25.945	25.3595	24.994	23.981	23.6113
2018-02-05 09:41:01	25.5	26.57	25.008	25	25.889	26.008	25.7345	25.9733	24.002	24.0907
2018-02-05 10:11:01	25.5	26.695	24.945	25	25.826	25.82	26.1405	26.744	24.2103	24.549
2018-02-05 10:41:01	25	25.945	24.945	25	25.826	25.82	26.547	27.452	24.231	24.6113
2018-02-05 11:11:01	26	26.32	25.07	25	25.826	25.945	26.9845	27.952	24.4393	25.028
2018-02-05 11:41:01	26	26.695	25.07	25.5	25.826	25.945	27.453	28.931	24.502	25.4447
2018-02-05 12:11:01	26	26.82	25.07	25	25.826	25.883	28.234	29.9513	24.8977	25.7363
2018-02-05 12:41:01	26	26.82	25.07	25	25.826	25.883	28.3905	29.722	24.9393	25.7363
2018-02-05 13:11:01	26	26.82	25.07	25.5	25.826	25.883	28.484	29.1807	24.9603	25.5073
2018-02-05 13:41:01	26.5	26.945	25.195	25.5	25.826	26.008	28.609	29.1807	24.981	25.4863
2018-02-05 14:11:01	26.5	27.07	25.32	25.5	25.826	26.008	28.9525	29.264	25.002	25.528
2018-02-05 14:41:01	26.5	27.32	25.445	26	25.889	26.07	29.0775	29.6597	25.1893	25.549
2018-02-05 15:11:01	27	27.82	25.633	26.5	25.951	26.258	29.7965	30.5757	25.3977	26.0073
2018-02-05 15:41:01	27	28.007	25.758	26.5	26.014	26.32	30.3275	31.45	25.481	26.528
2018-02-05 16:11:01	27	27.882	25.82	26.5	26.076	26.383	30.421	30.888	25.6893	26.5487
2018-02-05 16:41:01	27	27.82	25.883	26.5	26.139	26.508	30.202	29.8677	25.731	26.507
2018-02-05 17:11:01	27	27.695	25.758	26	26.139	26.32
2018-02-05 17:41:01	27	27.445	25.82	26	26.201	26.445
2018-02-05 18:11:01	27	27.507	25.82	26	26.201	26.383
2018-02-05 18:41:01	27	27.258	25.695	25.5	26.139	26.195
2018-02-05 19:11:01	26.5	26.945	25.57	25	26.076	26.07
2018-02-05 19:41:01	26.5	26.695	25.445	25	26.076	26.008
2018-02-05 20:11:01	26	26.508	25.383	25	26.014	26.008
2018-02-05 20:41:01	26	26.32	25.195	24.5	25.951	25.758
2018-02-05 21:11:01	26	26.07	25.07	24.5	25.826	25.695
2018-02-05 21:41:01	25.5	25.945	25.008	24.5	25.764	25.695
2018-02-05 22:11:01	25.5	25.883	24.945	24.5	25.764	25.695
2018-02-05 22:41:01	25.5	25.82	24.883	24.5	25.701	25.695
2018-02-05 23:11:01	25	25.758	24.883	24.5	25.639	25.758
2018-02-05 23:41:01	25	25.758	24.883	24.5	25.576	25.758
2018-02-06 00:11:01	25	25.758	24.82	24.5	25.576	25.758
2018-02-06 00:41:01	25	25.758	24.758	24.5	25.576	25.695
2018-02-06 01:11:01	25	25.695	24.695	24.5	25.576	25.633
2018-02-06 01:41:01	25	25.633	24.695	24.5	25.514	25.57
2018-02-06 02:11:01	25	25.633	24.633	24.5	25.451	25.57
2018-02-06 02:41:01	25	25.633	24.57	24	25.451	25.445
2018-02-06 03:11:01	24.5	25.508	24.508	24	25.389	25.508
2018-02-06 03:41:01	24.5	25.445	24.383	24	25.389	25.445
2018-02-06 04:11:01	24.5	25.383	24.32	24	25.326	25.383
2018-02-06 04:41:01	24.5	25.32	24.195	23.5	25.264	25.32
2018-02-06 05:11:01	24.5	25.195	24.133	24	25.201	25.258
2018-02-06 05:41:01	24.5	25.133	24.133	23.5	25.201	25.258
2018-02-06 06:11:01	24.5	25.133	24.07	24	25.139	25.258
2018-02-06 06:41:01	24.5	25.07	24.07	24	25.139	25.195
2018-02-06 07:11:01	24	25.008	24.07	24	25.076	25.258
2018-02-06 07:41:01	24	25.07	24.07	24	25.076	25.258
2018-02-06 08:11:01	24	25.133	24.133	24	25.076	25.32
2018-02-06 08:41:01	24.5	25.195	24.195	24	25.076	25.383
2018-02-06 09:11:01	24.5	25.258	24.258	24.5	25.139	25.508
2018-02-06 09:41:01	24.5	25.383	24.32	24.5	25.139	25.508
2018-02-06 10:11:01	24.5	25.383	24.383	24.5	25.139	25.445
2018-02-06 10:41:01	24.5	25.57	24.445	24.5	25.139	25.445
2018-02-06 11:11:01	24.5	25.633	24.508	25	25.201	25.445
2018-02-06 11:41:01	25	25.758	24.633	25	25.201	25.57
2018-02-06 12:11:01	25	25.883	24.758	25	25.264	25.633
2018-02-06 12:41:01	25	25.945	24.82	25	25.326	25.633
2018-02-06 13:11:01	25	25.945	24.82	25	25.326	25.508
2018-02-06 13:41:01	25	25.883	24.82	25	25.326	25.57
2018-02-06 14:11:01	25	25.945	24.82	25	25.326	25.508
2018-02-06 14:41:01	25	25.883	24.82	25	25.326	25.445
2018-02-06 15:11:01	25	25.82	24.758	24.5	25.326	25.445
2018-02-06 15:41:01	25	25.758	24.695	24.5	25.326	25.445
2018-02-06 16:11:01	25	25.695	24.758	24.5	25.326	25.508
2018-02-06 16:41:01	25	25.695	24.695	24.5	25.326	25.508
2018-02-06 17:11:01	25	25.57	24.633	24.5	25.264	25.383
2018-02-06 17:41:01	25	25.445	24.57	24	25.264	25.383
2018-02-06 18:11:01	25	25.32	24.445	24	25.201	25.32
2018-02-06 18:41:01	24.5	25.195	24.383	24	25.201	25.258
2018-02-06 19:11:01	24.5	25.07	24.32	24	25.139	25.258
2018-02-06 19:41:01	24.5	25.07	24.258	24	25.076	25.195
2018-02-06 20:11:01	24.5	24.945	24.195	24	25.076	25.195
2018-02-06 20:41:01	24.5	24.883	24.195	24	25.076	25.258
2018-02-06 21:11:01	24	24.883	24.133	24	25.014	25.195
2018-02-06 21:41:01	24	24.82	24.133	24	25.014	25.133
2018-02-06 22:11:01	24	24.82	24.07	24	24.951	25.07
2018-02-06 22:41:01	24	24.695	24.008	23.5	24.889	24.945
2018-02-06 23:11:01	24	24.633	23.945	23.5	24.826	24.883
2018-02-06 23:41:01	24	24.57	23.883	23.5	24.826	24.945
2018-02-07 00:11:01	24	24.508	23.883	23.5	24.764	24.883
2018-02-07 00:41:01	24	24.508	23.883	23.5	24.764	24.945
2018-02-07 01:11:01	24	24.445	23.82	23.5	24.764	24.883
2018-02-07 01:41:01	24	24.445	23.82	23.5	24.701	24.945
2018-02-07 02:11:01	24	24.445	23.82	24	24.701	24.945
2018-02-07 02:41:01	24	24.445	23.82	24	24.701	24.945
2018-02-07 03:11:01	24	24.383	23.82	23.5	24.701	24.82
2018-02-07 03:41:01	23.5	24.383	23.82	23.5	24.701	24.82
2018-02-07 04:11:01	23.5	24.32	23.758	23.5	24.701	24.82
2018-02-07 04:41:01	23.5	24.258	23.758	23.5	24.639	24.758
2018-02-07 05:11:01	23.5	24.258	23.758	23.5	24.576	24.695
2018-02-07 05:41:01	23.5	24.195	23.695	23.5	24.576	24.695
2018-02-07 06:11:01	23.5	24.133	23.695	23.5	24.576	24.695
2018-02-07 06:41:01	23.5	24.133	23.633	23.5	24.514	24.633
2018-02-07 07:11:01	23.5	24.07	23.633	23.5	24.514	24.57
2018-02-07 07:41:01	23.5	24.133	23.695	23.5	24.514	24.758
2018-02-07 08:11:01	23.5	24.383	23.883	24	24.576	24.883
2018-02-07 08:41:01	24	24.695	24.07	24.5	24.639	24.945
2018-02-07 09:11:01	24	24.945	24.195	24.5	24.701	24.883
2018-02-07 09:41:01	24	25.07	24.133	24	24.701	24.82
2018-02-07 10:11:01	24.5	25.07	24.133	24	24.639	24.633
2018-02-07 10:41:01	24.5	25.07	24.258	24.5	24.701	24.82
2018-02-07 11:11:01	24.5	25.383	24.32	24.5	24.764	24.883
2018-02-07 11:41:01	25	25.445	24.57	25	24.826	25.07
2018-02-07 12:11:01	25	25.945	24.82	25	24.951	25.07
2018-02-07 12:41:01	25.5	26.258	25.008	25.5	25.076	25.133
2018-02-07 13:11:01	26	26.695	25.445	26	25.326	25.32
2018-02-07 13:41:01	27	27.507	25.633	26	25.451	25.445
2018-02-07 14:11:01	27	27.383	25.82	26	25.639	25.445
2018-02-07 14:41:01	27.5	28.07	25.945	26	25.826	25.508
2018-02-07 15:11:01	28	28.257	26.008	25.5	25.889	25.508
2018-02-07 15:41:01	28.5	27.82	26.008	25.5	26.014	25.508
2018-02-07 16:11:01	28.5	28.132	26.008	25.5	26.139	25.508
2018-02-07 16:41:01	28.5	27.82	26.008	25	26.201	25.57
2018-02-07 17:11:01	28.5	27.57	25.945	25	26.201	25.508
2018-02-07 17:41:01	28	27.258	25.82	24.5	26.264	25.445
2018-02-07 18:11:01	28	26.758	25.695	24.5	26.201	25.383
2018-02-07 18:41:01	27.5	26.445	25.508	24	26.139	25.258
2018-02-07 19:11:01	27	26.07	25.383	24	26.076	25.383
2018-02-07 19:41:01	27	25.883	25.195	24	26.014	25.32
2018-02-07 20:11:01	26.5	25.57	25.008	24	25.889	25.258
2018-02-07 20:41:01	26	25.383	24.883	23.5	25.701	25.258
2018-02-07 21:11:01	25.5	25.195	24.758	24	25.576	25.258
2018-02-07 21:41:01	25.5	25.07	24.695	23.5	25.576	25.195
2018-02-07 22:11:01	25.5	25.008	24.633	24	25.514	25.195
2018-02-07 22:41:01	25	24.945	24.57	24	25.451	25.195
2018-02-07 23:11:01	25	24.945	24.445	24	25.389	25.195
2018-02-07 23:41:01	25	24.883	24.383	24	25.264	25.133
2018-02-08 00:11:01	24.5	24.82	24.32	23.5	25.201	25.07
2018-02-08 00:41:01	24.5	24.758	24.258	23.5	25.139	25.008
2018-02-08 01:11:01	24.5	24.633	24.195	23.5	25.076	24.945
2018-02-08 01:41:01	24.5	24.57	24.07	23.5	25.014	24.883
2018-02-08 02:11:01	24	24.445	24.008	23.5	24.951	24.82
2018-02-08 02:41:01	24	24.32	23.945	23	24.951	24.758
2018-02-08 03:11:01	24	24.195	23.82	23	24.889	24.633
2018-02-08 03:41:01	24	24.07	23.758	23	24.826	24.57
2018-02-08 04:11:01	23.5	24.008	23.695	23	24.764	24.57
2018-02-08 04:41:01	23.5	23.945	23.57	23	24.701	24.508
2018-02-08 05:11:01	23.5	23.82	23.507	22.5	24.639	24.508
2018-02-08 05:41:01	23.5	23.758	23.445	22.5	24.514	24.445
2018-02-08 06:11:01	23.5	23.695	23.382	22.5	24.451	24.383
2018-02-08 06:41:01	23	23.633	23.32	22.5	24.389	24.383
2018-02-08 07:11:01	23	23.57	23.32	22.5	24.326	24.445
2018-02-08 07:41:01	23	23.695	23.382	23	24.326	24.508
2018-02-08 08:11:01	23	23.758	23.507	23.5	24.389	24.633
2018-02-08 08:41:01	23.5	24.07	23.82	24	24.576	24.945
2018-02-08 09:11:01	23.5	24.508	24.195	24.5	24.764	25.133
2018-02-08 09:41:01	24	24.82	24.57	25	24.951	25.195
2018-02-08 10:11:01	24	25.383	25.008	26	25.201	25.445
2018-02-08 10:41:01	24.5	25.758	25.445	26	25.451	25.445
2018-02-08 11:11:01	25	26.133	25.695	26	25.576	25.57
2018-02-08 11:41:01	25.5	26.383	26.508	27.5	25.826	25.57
2018-02-08 12:11:01	26	26.695	26.508	27	25.951	25.633
2018-02-08 12:41:01	26.5	26.758	26.695	26.5	26.139	25.82
2018-02-08 13:11:01	27	27.195	26.758	26.5	26.264	25.945
2018-02-08 13:41:01	27.5	27.695	26.695	26.5	26.264	25.82
2018-02-08 14:11:01	27.5	28.132	26.57	26.5	26.264	25.758
2018-02-08 14:41:01	28.5	28.632	26.445	26	26.264	25.633
2018-02-08 15:11:01	28.5	28.319	26.32	26	26.201	25.508
2018-02-08 15:41:01	28.5	28.944	26.32	25.5	26.201	25.633
2018-02-08 16:11:01	29	29.006	26.133	25.5	26.139	25.445
2018-02-08 16:41:01	28.5	28.382	26.008	25.5	26.139	25.508
2018-02-08 17:11:01	29	28.632	25.883	25	26.076	25.445
2018-02-08 17:41:01	28.5	27.945	25.695	25	26.014	25.445
2018-02-08 18:11:01	28	27.383	25.508	24.5	25.951	25.32
2018-02-08 18:41:01	27.5	26.82	25.383	24.5	25.764	25.32
2018-02-08 19:11:01	27	26.32	25.195	24	25.639	25.195
2018-02-08 19:41:01	26.5	25.883	25.07	24	25.514	25.195
2018-02-08 20:11:01	26.5	25.57	24.945	24	25.389	25.195
2018-02-08 20:41:01	26	25.32	24.82	24	25.264	25.07
2018-02-08 21:11:01	25.5	25.133	24.695	24	25.139	25.008
2018-02-08 21:41:01	25.5	25.008	24.57	23.5	25.076	24.945
2018-02-08 22:11:01	25	24.758	24.383	23.5	24.951	24.82
2018-02-08 22:41:01	25	24.695	24.195	23	24.826	24.82
2018-02-08 23:11:01	24.5	24.633	24.008	23	24.701	24.633
2018-02-08 23:41:01	24.5	24.445	23.883	23	24.576	24.57
2018-02-09 00:11:01	24	24.32	23.758	23	24.514	24.508
2018-02-09 00:41:01	24	24.258	23.633	23	24.451	24.445
2018-02-09 01:11:01	23.5	24.195	23.507	23	24.326	24.383
2018-02-09 01:41:01	23.5	24.07	23.445	23	24.264	24.445
2018-02-09 02:11:01	23.5	24.07	23.382	23	24.201	24.383
2018-02-09 02:41:01	23.5	24.008	23.32	23	24.076	24.32
2018-02-09 03:11:01	23.5	23.945	23.195	23	24.014	24.258
2018-02-09 03:41:01	23	23.883	23.195	22.5	23.951	24.258
2018-02-09 04:11:01	23	23.82	23.07	22.5	23.889	24.133
2018-02-09 04:41:01	23	23.758	23.007	22.5	23.826	24.133
2018-02-09 05:11:01	23	23.695	22.945	22.5	23.764	24.07
2018-02-09 05:41:01	23	23.633	22.945	22.5	23.701	24.008
2018-02-09 06:11:01	22.5	23.57	22.882	22.5	23.638	23.945
2018-02-09 06:41:01	22.5	23.57	22.882	22.5	23.638	24.008
2018-02-09 07:11:01	22.5	23.633	23.007	23	23.638	24.07
2018-02-09 07:41:01	23	23.758	23.07	23.5	23.638	24.32
2018-02-09 08:11:01	23	23.945	23.195	23.5	23.764	24.383
2018-02-09 08:41:01	23	24.07	23.32	24	23.826	24.445
2018-02-09 09:11:01	23	24.258	23.507	24	23.889	24.57
2018-02-09 09:41:01	23.5	24.633	23.758	24.5	24.076	24.633
2018-02-09 10:11:01	23.5	24.945	24.195	25.5	24.264	24.82
2018-02-09 10:41:01	24	25.258	24.695	26	24.576	25.008
2018-02-09 11:11:01	24.5	25.508	25.383	26.5	24.826	25.133
2018-02-09 11:41:01	25	25.945	26.07	27.5	25.139	25.195
2018-02-09 12:11:01	25.5	26.445	26.32	27	25.326	25.32
2018-02-09 12:41:01	26	26.758	26.133	26.5	25.264	25.195
2018-02-09 13:11:01	26	26.57	26.383	27.5	25.451	25.32
2018-02-09 13:41:01	27	27.507	26.945	28	25.701	25.57
2018-02-09 14:11:01	29	30.692	26.508	26.5	25.701	25.508
2018-02-09 14:41:01	29	29.568	26.383	26.5	25.701	25.383
2018-02-09 15:11:01	29	29.006	26.445	26.5	25.826	25.508
2018-02-09 15:41:01	29.5	29.756	26.32	26	25.889	25.383
2018-02-09 16:11:01	29.5	29.319	26.258	26	25.951	25.383

## Sheet: Figure 3B
Cross (female x male)	Hatch proportion
Uninfected x wMel (26°C)	0
Uninfected x wMel (26°C)	0
Uninfected x wMel (26°C)	0
Uninfected x wMel (26°C)	0
Uninfected x wMel (26°C)	0
Uninfected x wMel (26°C)	0
Uninfected x wMel (26°C)	0
Uninfected x wMel (26°C)	0
Uninfected x wMel (26°C)	0
Uninfected x wMel (26°C)	0
Uninfected x wMel (26°C)	0
Uninfected x wMel (26°C)	0
Uninfected x wMel (26°C)	0
Uninfected x wMel (26°C)	0
Uninfected x wMel (26°C)	0
Uninfected x wMel (26°C)	0
Uninfected x wMel (26°C)	0
Uninfected x wMel (26°C)	0
Uninfected x wMel (26°C)	0
Uninfected x wMel (26°C)	0
Uninfected x wMel (26°C)	0
Uninfected x wMel (26°C)	0
Uninfected x wMel (26°C)	0
Uninfected x wMel (26°C)	0
Uninfected x wMel (26°C)	0
Uninfected x wMel (50% shade)	0
Uninfected x wMel (50% shade)	0.090909
Uninfected x wMel (50% shade)	0
Uninfected x wMel (50% shade)	0.044776
Uninfected x wMel (50% shade)	0
Uninfected x wMel (50% shade)	0.017544
Uninfected x wMel (50% shade)	0
Uninfected x wMel (50% shade)	0
Uninfected x wMel (50% shade)	0.016393
Uninfected x wMel (50% shade)	0
Uninfected x wMel (50% shade)	0
Uninfected x wMel (50% shade)	0.015873
Uninfected x wMel (50% shade)	0
Uninfected x wMel (50% shade)	0.013333
Uninfected x wMel (50% shade)	0
Uninfected x wMel (50% shade)	0
Uninfected x wMel (50% shade)	0.054545
Uninfected x wMel (50% shade)	0
wMel (50% shade) x Uninfected	0.938776
wMel (50% shade) x Uninfected	1
wMel (50% shade) x Uninfected	1
wMel (50% shade) x Uninfected	0.982456
wMel (50% shade) x Uninfected	0.977778
wMel (50% shade) x Uninfected	0.928571
wMel (50% shade) x Uninfected	0.960784
wMel (50% shade) x Uninfected	1
wMel (50% shade) x Uninfected	0.9375
wMel (50% shade) x Uninfected	1
wMel (50% shade) x Uninfected	0.925
wMel (50% shade) x Uninfected	0.931818
wMel (50% shade) x Uninfected	1
wMel (50% shade) x Uninfected	1
wMel (50% shade) x Uninfected	0.972973
wMel (50% shade) x Uninfected	1
wMel (50% shade) x Uninfected	1
wMel (50% shade) x Uninfected	0.826087
wMel (50% shade) x Uninfected	0.933333
wMel (50% shade) x wMel (50% shade)	0.552632
wMel (50% shade) x wMel (50% shade)	0
wMel (50% shade) x wMel (50% shade)	0.075
wMel (50% shade) x wMel (50% shade)	0.389831
wMel (50% shade) x wMel (50% shade)	0.234568
wMel (50% shade) x wMel (50% shade)	0.259259
wMel (50% shade) x wMel (50% shade)	0.2
wMel (50% shade) x wMel (50% shade)	0.214286
wMel (50% shade) x wMel (50% shade)	0.196721
wMel (50% shade) x wMel (50% shade)	0.090909
wMel (50% shade) x wMel (50% shade)	0.175439
wMel (50% shade) x wMel (50% shade)	0.246377
wMel (50% shade) x wMel (50% shade)	0.12963
wMel (50% shade) x wMel (50% shade)	0.391304
wMel (50% shade) x wMel (50% shade)	0.245902
wMel (50% shade) x wMel (50% shade)	0.014286
wMel (50% shade) x wMel (50% shade)	0.227273
wMel (50% shade) x wMel (50% shade)	0.112676
wMel (50% shade) x wMel (50% shade)	0.338235
wMel (50% shade) x wMel (50% shade)	0.046875
wMel (50% shade) x wMel (50% shade)	0.075758
wMel (50% shade) x wMel (50% shade)	0.058824
wMel (50% shade) x wMel (50% shade)	0.031746
wMel (50% shade) x wMel (50% shade)	0.108696
wMel (50% shade) x wMel (50% shade)	0.233333

## Sheet: Figure 4
Sex	Container type	Shade level	Wolbachia density (2^n ΔCp)	Infection status
Female	Bucket	0.99	0.111105	Positive
Female	Bucket	0.99	0.181747	Positive
Female	Bucket	0.99	0.216134	Positive
Female	Bucket	0.99	0.26334	Positive
Female	Bucket	0.99	0.26334	Positive
Female	Bucket	0.99	0.264255	Positive
Female	Bucket	0.99	0.293209	Positive
Female	Bucket	0.99	0.326465	Positive
Female	Bucket	0.99	0.482968	Positive
Female	Bucket	0.99	0.646176	Positive
Female	Bucket	0.99	0.70466	Positive
Female	Bucket	0.99	0.820742	Positive
Female	Bucket	0.99	1.12117	Positive
Female	Bucket	0.99	1.12117	Positive
Female	Bucket	0.99	1.18509	Positive
Female	Bucket	0.99	1.32409	Positive
Female	Takeaway	0.99	0.117034	Positive
Female	Takeaway	0.99	0.304603	Positive
Female	Takeaway	0.99	0.386891	Positive
Female	Takeaway	0.99	0.442884	Positive
Female	Takeaway	0.99	0.45219	Positive
Female	Takeaway	0.99	0.494828	Positive
Female	Takeaway	0.99	0.590496	Positive
Female	Takeaway	0.99	0.664343	Positive
Female	Takeaway	0.99	0.773782	Positive
Female	Takeaway	0.99	0.78187	Positive
Female	Takeaway	0.99	0.843816	Positive
Female	Takeaway	0.99	0.933033	Positive
Female	Takeaway	0.99	1.10191	Positive
Female	Takeaway	0.99	1.11342	Positive
Female	Takeaway	0.99	1.43396	Positive
Female	Takeaway	0.99	2.09217	Positive
Female	Bucket	0.5	0.00110633	Positive
Female	Bucket	0.5	0.00116134	Positive
Female	Bucket	0.5	0.00138107	Positive
Female	Bucket	0.5	0.00171806	Positive
Female	Bucket	0.5	0.00206449	Positive
Female	Bucket	0.5	0.00247218	Positive
Female	Bucket	0.5	0.00322832	Positive
Female	Bucket	0.5	0.0051365	Positive
Female	Bucket	0.5	0.00526263	Positive
Female	Bucket	0.5	0.00541058	Positive
Female	Bucket	0.5	0.00773169	Positive
Female	Bucket	0.5	0.0122591	Positive
Female	Bucket	0.5		Negative
Female	Bucket	0.5		Negative
Female	Bucket	0.5		Negative
Female	Bucket	0.5		Negative
Female	Takeaway	0.5	0.00167689	Positive
Female	Takeaway	0.5	0.00185418	Positive
Female	Takeaway	0.5	0.0033771	Positive
Female	Takeaway	0.5		Negative
Female	Takeaway	0.5		Negative
Female	Takeaway	0.5		Negative
Female	Takeaway	0.5		Negative
Female	Takeaway	0.5		Negative
Female	Takeaway	0.5		Negative
Female	Takeaway	0.5		Negative
Female	Takeaway	0.5		Negative
Female	Takeaway	0.5		Negative
Female	Takeaway	0.5		Negative
Female	Takeaway	0.5		Negative
Female	Takeaway	0.5		Negative
Female	Takeaway	0.5		Negative
Female	Laboratory	26C	0.537747	Positive
Female	Laboratory	26C	0.598739	Positive
Female	Laboratory	26C	0.664343	Positive
Female	Laboratory	26C	0.837987	Positive
Female	Laboratory	26C	0.861546	Positive
Female	Laboratory	26C	0.989657	Positive
Female	Laboratory	26C	1.01045	Positive
Female	Laboratory	26C	1.31039	Positive
Female	Laboratory	26C	1.31494	Positive
Female	Laboratory	26C	1.87905	Positive
Female	Laboratory	26C	2.17347	Positive
Female	Laboratory	26C	2.17347	Positive
Female	Laboratory	26C	2.32947	Positive
Female	Laboratory	26C	2.49666	Positive
Female	Laboratory	26C	3.00008	Positive
Female	Laboratory	26C	5.93809	Positive
Male	Bucket	0.99	0.129857	Positive
Male	Bucket	0.99	0.161544	Positive
Male	Bucket	0.99	0.244008	Positive
Male	Bucket	0.99	0.280292	Positive
Male	Bucket	0.99	0.307786	Positive
Male	Bucket	0.99	0.349896	Positive
Male	Bucket	0.99	0.359733	Positive
Male	Bucket	0.99	0.460094	Positive
Male	Bucket	0.99	0.840896	Positive
Male	Bucket	0.99	1.04972	Positive
Male	Bucket	0.99	1.12506	Positive
Male	Bucket	0.99	1.16878	Positive
Male	Bucket	0.99	1.20581	Positive
Male	Bucket	0.99	1.23114	Positive
Male	Bucket	0.99	1.46917	Positive
Male	Bucket	0.99	1.49485	Positive
Male	Takeaway	0.99	0.198884	Positive
Male	Takeaway	0.99	0.298334	Positive
Male	Takeaway	0.99	0.560583	Positive
Male	Takeaway	0.99	0.752623	Positive
Male	Takeaway	0.99	0.790041	Positive
Male	Takeaway	0.99	0.888843	Positive
Male	Takeaway	0.99	1	Positive
Male	Takeaway	0.99	1.08673	Positive
Male	Takeaway	0.99	1.10191	Positive
Male	Takeaway	0.99	1.12896	Positive
Male	Takeaway	0.99	1.57462	Positive
Male	Takeaway	0.99	1.6077	Positive
Male	Takeaway	0.99	1.64718	Positive
Male	Takeaway	0.99	1.69349	Positive
Male	Takeaway	0.99	1.7593	Positive
Male	Takeaway	0.99	2.21146	Positive
Male	Bucket	0.5	0.00140521	Positive
Male	Bucket	0.5	0.00269593	Positive
Male	Bucket	0.5	0.00293994	Positive
Male	Bucket	0.5	0.00336541	Positive
Male	Bucket	0.5	0.0034841	Positive
Male	Bucket	0.5	0.00378629	Positive
Male	Bucket	0.5	0.00497875	Positive
Male	Bucket	0.5	0.00552427	Positive
Male	Bucket	0.5	0.00612956	Positive
Male	Bucket	0.5	0.00775854	Positive
Male	Bucket	0.5	0.0135084	Positive
Male	Bucket	0.5	0.0187756	Positive
Male	Bucket	0.5	0.363493	Positive
Male	Bucket	0.5		Negative
Male	Bucket	0.5		Negative
Male	Bucket	0.5		Negative
Male	Takeaway	0.5	0.00189314	Positive
Male	Takeaway	0.5	0.00222035	Positive
Male	Takeaway	0.5	0.00430432	Positive
Male	Takeaway	0.5	0.00482585	Positive
Male	Takeaway	0.5		Negative
Male	Takeaway	0.5		Negative
Male	Takeaway	0.5		Negative
Male	Takeaway	0.5		Negative
Male	Takeaway	0.5		Negative
Male	Takeaway	0.5		Negative
Male	Takeaway	0.5		Negative
Male	Takeaway	0.5		Negative
Male	Takeaway	0.5		Negative
Male	Takeaway	0.5		Negative
Male	Takeaway	0.5		Negative
Male	Takeaway	0.5		Negative
Male	Laboratory	26C	0.843816	Positive
Male	Laboratory	26C	1.10191	Positive
Male	Laboratory	26C	1.26576	Positive
Male	Laboratory	26C	1.29235	Positive
Male	Laboratory	26C	1.42899	Positive
Male	Laboratory	26C	1.48968	Positive
Male	Laboratory	26C	1.51572	Positive
Male	Laboratory	26C	1.52098	Positive
Male	Laboratory	26C	1.80876	Positive
Male	Laboratory	26C	2.02792	Positive
Male	Laboratory	26C	2.16595	Positive
Male	Laboratory	26C	2.43682	Positive
Male	Laboratory	26C	2.5403	Positive
Male	Laboratory	26C	2.62989	Positive
Male	Laboratory	26C	3.00008	Positive
Male	Laboratory	26C	4.50023	Positive

## Sheet: Figure 5
Female Wolbachia density (2^n ΔCp)	Hatch proportion
0.002421	0
0.008609	0
0.004216	0
0.00367	0.037037
0.005154	0.016667
0.001289	0.017544
0.001069	0.078947
0.004613	0.027778
0.000804	0
0.012517	0
0.007652	0.027778
0.00296	0.047619
0.001748	0
0.002079	0
0.10083	0.245902
0.161544	0.389831
0.058315	0.259259
0.054788	0.214286
0.057512	0.233333
0.020905	0.090909
0.073812	0.234568
0.02797	0.112676
0.016746	0.014286
0.013888	0
0.029977	0.227273
0.016176	0.246377
0.010237	0.075758
0.045437	0.12963
0.009227	0.031746
0.07911	0.552632
0.066986	0.338235
0.044502	0.2
0.028756	0.108696
0.020193	0.058824
0.020333	0.196721
0.010525	0.175439
0.01278	0.075
0.015953	0.046875
0.895025	0.978723
5.1337	0.863014
1.69349	0.940299
1.24833	0.857143
0.473029	0.754098
1.91853	0.920792
3.11666	0.982759
0.262429	0.372549
1.85318	0.9375
0.655197	0.9375
0.598739	0.936508
2.67585	0.907895
0.185565	0.415385
1.16473	0.611111
1.65864	0.964912
0.650671	0.973684
7.56846	0.881356
0.291183	0.930556
0.539614	0.425
0.312083	0
0.273573	0.794118
0.673617	0.552239
0.41466	0.619048
0.429283	0.7
0.456916	0.382353
0.336808	0.61194
0.136787	0.31746

## Sheet: Figure 6A
Temperature cycle	Strain	Hatch proportion
8-18C	Uninfected	0.619048
8-18C	Uninfected	0.761905
8-18C	Uninfected	0.56
8-18C	Uninfected	0.921053
8-18C	Uninfected	0.72
8-18C	Uninfected	0.75
8-18C	wAlbB	0.59375
8-18C	wAlbB	0.642857
8-18C	wAlbB	0.675676
8-18C	wAlbB	0.69697
8-18C	wAlbB	0.705882
8-18C	wAlbB	0.806452
8-18C	wMel	0.83871
8-18C	wMel	0.740741
8-18C	wMel	0.769231
8-18C	wMel	0.8125
8-18C	wMel	0.83871
8-18C	wMel	0.694444
8-18C	wMelPop	0.392857
8-18C	wMelPop	0.588235
8-18C	wMelPop	0.76
8-18C	wMelPop	0.5
8-18C	wMelPop	0.533333
8-18C	wMelPop	0.558824
11-21C	Uninfected	0.761905
11-21C	Uninfected	0.8
11-21C	Uninfected	0.608696
11-21C	Uninfected	0.653846
11-21C	Uninfected	0.807692
11-21C	Uninfected	0.617647
11-21C	wAlbB	0.864865
11-21C	wAlbB	0.655172
11-21C	wAlbB	0.846154
11-21C	wAlbB	0.833333
11-21C	wAlbB	0.736842
11-21C	wAlbB	0.689655
11-21C	wMel	0.833333
11-21C	wMel	0.848485
11-21C	wMel	0.608696
11-21C	wMel	0.90625
11-21C	wMel	0.861111
11-21C	wMel	0.64
11-21C	wMelPop	0.789474
11-21C	wMelPop	0.666667
11-21C	wMelPop	0.565217
11-21C	wMelPop	0.521739
11-21C	wMelPop	0.357143
11-21C	wMelPop	0.517241
14-24C	Uninfected	0.862069
14-24C	Uninfected	0.612903
14-24C	Uninfected
14-24C	Uninfected	0.918919
14-24C	Uninfected	0.857143
14-24C	Uninfected	0.916667
14-24C	wAlbB	0.933333
14-24C	wAlbB	0.903226
14-24C	wAlbB	0.8
14-24C	wAlbB	0.666667
14-24C	wAlbB	0.914286
14-24C	wAlbB	0.653846
14-24C	wMel	0.8
14-24C	wMel	0.666667
14-24C	wMel	0.807692
14-24C	wMel	0.846154
14-24C	wMel	0.771429
14-24C	wMel	0.741935
14-24C	wMelPop	0.657895
14-24C	wMelPop	0.823529
14-24C	wMelPop	0.75
14-24C	wMelPop	0.592593
14-24C	wMelPop	0.714286
14-24C	wMelPop	0.7
17-27C	Uninfected	0.904762
17-27C	Uninfected	0.846154
17-27C	Uninfected	0.9
17-27C	Uninfected	0.736842
17-27C	Uninfected	0.88
17-27C	Uninfected	0.8
17-27C	wAlbB	0.758621
17-27C	wAlbB	0.925
17-27C	wAlbB	0.814815
17-27C	wAlbB	0.666667
17-27C	wAlbB	0.92
17-27C	wAlbB	0.782609
17-27C	wMel	0.551724
17-27C	wMel	0.913043
17-27C	wMel	0.75
17-27C	wMel	1
17-27C	wMel	1
17-27C	wMel	0.83871
17-27C	wMelPop	0.772727
17-27C	wMelPop	0.681818
17-27C	wMelPop	0.875
17-27C	wMelPop	0.897436
17-27C	wMelPop	0.65625
17-27C	wMelPop	0.740741
20-30C	Uninfected	0.862069
20-30C	Uninfected	0.8
20-30C	Uninfected	0.833333
20-30C	Uninfected	0.857143
20-30C	Uninfected	0.857143
20-30C	Uninfected	0.842105
20-30C	wAlbB	0.785714
20-30C	wAlbB	0.875
20-30C	wAlbB	0.68
20-30C	wAlbB	0.815789
20-30C	wAlbB	0.69697
20-30C	wAlbB	0.75
20-30C	wMel	0.709677
20-30C	wMel	0.896552
20-30C	wMel	0.8125
20-30C	wMel	0.9375
20-30C	wMel	0.909091
20-30C	wMel	0.842105
20-30C	wMelPop	0.833333
20-30C	wMelPop	0.684211
20-30C	wMelPop	0.483871
20-30C	wMelPop	0.894737
20-30C	wMelPop	0.777778
20-30C	wMelPop	0.95
23-33C	Uninfected	0.730769
23-33C	Uninfected	0.962963
23-33C	Uninfected	0.882353
23-33C	Uninfected	0.727273
23-33C	Uninfected	0.833333
23-33C	Uninfected	0.75
23-33C	wAlbB	0.846154
23-33C	wAlbB	0.634146
23-33C	wAlbB	0.848485
23-33C	wAlbB	0.807692
23-33C	wAlbB	0.896552
23-33C	wAlbB	0.794872
23-33C	wMel	0.769231
23-33C	wMel	0.884615
23-33C	wMel	0.90625
23-33C	wMel	0.75
23-33C	wMel	0.914286
23-33C	wMel	0.875
23-33C	wMelPop	0.944444
23-33C	wMelPop	0.5
23-33C	wMelPop	0.913043
23-33C	wMelPop	0.684211
23-33C	wMelPop	0.774194
23-33C	wMelPop	0.708333
26-36C	Uninfected	0.782609
26-36C	Uninfected	0.655172
26-36C	Uninfected	0.75
26-36C	Uninfected	0.942857
26-36C	Uninfected	0.869565
26-36C	Uninfected	0.677419
26-36C	wAlbB	0.62069
26-36C	wAlbB	0.864865
26-36C	wAlbB	0.633333
26-36C	wAlbB	0.826087
26-36C	wAlbB	0.884615
26-36C	wAlbB	0.7
26-36C	wMel	0.55
26-36C	wMel	0.862069
26-36C	wMel	0.866667
26-36C	wMel	0.88
26-36C	wMel	0.871795
26-36C	wMel	0.727273
26-36C	wMelPop	0.227273
26-36C	wMelPop	0.2
26-36C	wMelPop	0.384615
26-36C	wMelPop	0.28125
26-36C	wMelPop	0.25
26-36C	wMelPop	0.583333
29-39C	Uninfected	0.833333
29-39C	Uninfected	0.586207
29-39C	Uninfected	0.862069
29-39C	Uninfected	0.925926
29-39C	Uninfected	0.333333
29-39C	Uninfected	0.965517
29-39C	wAlbB	0.0434783
29-39C	wAlbB	0
29-39C	wAlbB	0.46875
29-39C	wAlbB	0.709091
29-39C	wAlbB	0.393939
29-39C	wAlbB	0
29-39C	wMel	0.352941
29-39C	wMel	0.771429
29-39C	wMel	0.826087
29-39C	wMel	0.794872
29-39C	wMel	0.533333
29-39C	wMel	0.733333
29-39C	wMelPop	0.238095
29-39C	wMelPop	0.0526316
29-39C	wMelPop	0.1
29-39C	wMelPop	0.105263
29-39C	wMelPop	0.0833333
29-39C	wMelPop	0.0526316
32-42C	Uninfected	0.05
32-42C	Uninfected	0
32-42C	Uninfected	0
32-42C	Uninfected	0
32-42C	Uninfected	0
32-42C	Uninfected	0
32-42C	wAlbB	0.0540541
32-42C	wAlbB	0
32-42C	wAlbB	0
32-42C	wAlbB	0.0384615
32-42C	wAlbB	0
32-42C	wAlbB	0
32-42C	wMel	0
32-42C	wMel	0
32-42C	wMel	0
32-42C	wMel	0
32-42C	wMel	0
32-42C	wMel	0
32-42C	wMelPop	0
32-42C	wMelPop	0
32-42C	wMelPop	0
32-42C	wMelPop	0
32-42C	wMelPop	0
32-42C	wMelPop	0
26C	Uninfected	0.774194
26C	Uninfected	0.818182
26C	Uninfected	0.576923
26C	Uninfected	1
26C	Uninfected	0.615385
26C	Uninfected	0.826087
26C	wAlbB	0.740741
26C	wAlbB	0.823529
26C	wAlbB	0.6
26C	wAlbB	0.8
26C	wAlbB	0.655172
26C	wAlbB	0.857143
26C	wMel	0.916667
26C	wMel	0.714286
26C	wMel	0.714286
26C	wMel	0.958333
26C	wMel	0.605263
26C	wMel	0.827586
26C	wMelPop	0.695652
26C	wMelPop	0.777778
26C	wMelPop	0.615385
26C	wMelPop	0.444444
26C	wMelPop	0.64
26C	wMelPop	0.590909

## Sheet: Figure 6B-C
Sex	Strain	Temperature cycle	Infection status	Wolbachia density (2^n ΔCp)
Female	wAlbB	11-21C	Positive	9.25351
Female	wAlbB	11-21C	Positive	14.0257
Female	wAlbB	11-21C	Positive	7.56846
Female	wAlbB	11-21C	Positive	8.33973
Female	wAlbB	11-21C	Positive	7.83536
Female	wAlbB	11-21C	Positive	16.4498
Female	wAlbB	11-21C	Positive	8.39773
Female	wAlbB	11-21C	Positive	13.8326
Female	wAlbB	11-21C	Positive	18.7654
Female	wAlbB	11-21C	Positive	2.88786
Female	wMel	11-21C	Positive	3.94493
Female	wMel	11-21C	Positive	2.04202
Female	wMel	11-21C	Positive	1.82766
Female	wMel	11-21C	Positive	3.83706
Female	wMel	11-21C	Positive	3.89062
Female	wMel	11-21C	Positive	2.88786
Female	wMel	11-21C	Positive	2.31338
Female	wMel	11-21C	Positive	4.99332
Female	wMel	11-21C	Positive	3.01049
Female	wMel	11-21C	Positive	2.12874
Female	wMelPop	11-21C	Positive	191.341
Female	wMelPop	11-21C	Positive	206.024
Female	wMelPop	11-21C	Positive	133.128
Female	wMelPop	11-21C	Positive	248.425
Female	wMelPop	11-21C	Positive	140.07
Female	wMelPop	11-21C	Positive	102.3
Female	wMelPop	11-21C	Positive	23.9176
Female	wMelPop	11-21C	Positive	849.223
Female	wMelPop	11-21C	Positive	116.97
Female	wAlbB	14-24C	Positive	7.11074
Female	wAlbB	14-24C	Positive	8.11168
Female	wAlbB	14-24C	Positive	2.41162
Female	wAlbB	14-24C	Positive	0.80107
Female	wAlbB	14-24C	Positive	2.88786
Female	wAlbB	14-24C	Positive	7.78124
Female	wAlbB	14-24C	Positive	7.21
Female	wAlbB	14-24C	Positive	4.89056
Female	wAlbB	14-24C	Positive	17.3878
Female	wAlbB	14-24C	Positive	2.34892
Female	wMel	14-24C	Positive	2.05623
Female	wMel	14-24C	Positive	1.85318
Female	wMel	14-24C	Positive	2.80889
Female	wMel	14-24C	Positive	3.34035
Female	wMel	14-24C	Positive	2.88786
Female	wMel	14-24C	Positive	1.54756
Female	wMel	14-24C	Positive	1.51572
Female	wMel	14-24C	Positive	1.7411
Female	wMel	14-24C	Positive	0.926588
Female	wMel	14-24C	Positive	2.34567
Female	wMelPop	14-24C	Positive	197.403
Female	wMelPop	14-24C	Positive	134.364
Female	wMelPop	14-24C	Positive	415.873
Female	wMelPop	14-24C	Positive	27.8576
Female	wMelPop	14-24C	Positive	168.897
Female	wMelPop	14-24C	Positive	124.788
Female	wMelPop	14-24C	Positive	117.512
Female	wMelPop	14-24C	Positive	64.8934
Female	wMelPop	14-24C	Positive	6.63456
Female	wMelPop	14-24C	Positive	27.0958
Female	wAlbB	17-27C	Positive	3.75809
Female	wAlbB	17-27C	Positive	5.16941
Female	wAlbB	17-27C	Positive	2.82843
Female	wAlbB	17-27C	Positive	6.6807
Female	wAlbB	17-27C	Positive	4.22807
Female	wAlbB	17-27C	Positive	9.51366
Female	wAlbB	17-27C	Positive	27.8576
Female	wAlbB	17-27C	Positive	11.7942
Female	wAlbB	17-27C	Positive	16.5642
Female	wAlbB	17-27C	Positive	8.28212
Female	wMel	17-27C	Positive	1.97247
Female	wMel	17-27C	Positive	1.54756
Female	wMel	17-27C	Positive	0.959264
Female	wMel	17-27C	Positive	2.80889
Female	wMel	17-27C	Positive	1.53688
Female	wMel	17-27C	Positive	0.82932
Female	wMel	17-27C	Positive	1.76541
Female	wMel	17-27C	Positive	2.56685
Female	wMel	17-27C	Positive	3.11666
Female	wMel	17-27C	Positive	4.14106
Female	wMelPop	17-27C	Positive	116.431
Female	wMelPop	17-27C	Positive	153.277
Female	wMelPop	17-27C	Positive	314.083
Female	wMelPop	17-27C	Positive	24.59
Female	wMelPop	17-27C	Positive	1618
Female	wMelPop	17-27C	Positive	754.826
Female	wMelPop	17-27C	Positive	19.1597
Female	wMelPop	17-27C	Positive	163.144
Female	wMelPop	17-27C	Positive	374.806
Female	wMelPop	17-27C	Positive	63.1189
Female	wAlbB	20-30C	Positive	25.6342
Female	wAlbB	20-30C	Positive	14.3204
Female	wAlbB	20-30C	Positive	10.7034
Female	wAlbB	20-30C	Positive	11.0809
Female	wAlbB	20-30C	Positive	7.1602
Female	wAlbB	20-30C	Positive	9.51366
Female	wAlbB	20-30C	Positive	20.393
Female	wAlbB	20-30C	Positive	3.91768
Female	wAlbB	20-30C	Positive	30.2738
Female	wAlbB	20-30C	Positive	16.3362
Female	wMel	20-30C	Positive	1.18921
Female	wMel	20-30C	Positive	1.24833
Female	wMel	20-30C	Positive	1.77769
Female	wMel	20-30C	Positive	0.687771
Female	wMel	20-30C	Positive	1.07177
Female	wMel	20-30C	Positive	2.58471
Female	wMel	20-30C	Positive	1.13288
Female	wMel	20-30C	Positive	1.19748
Female	wMel	20-30C	Positive	2.60268
Female	wMel	20-30C	Positive	1.31039
Female	wMelPop	20-30C	Positive	1269.46
Female	wMelPop	20-30C	Positive	23.5883
Female	wMelPop	20-30C	Positive	75.5835
Female	wMelPop	20-30C	Positive	831.746
Female	wMelPop	20-30C	Positive	240.518
Female	wMelPop	20-30C	Positive	16.1672
Female	wMelPop	20-30C	Positive	37.2715
Female	wMelPop	20-30C	Positive	1573.76
Female	wMelPop	20-30C	Positive	13.9288
Female	wMelPop	20-30C	Positive	5.9794
Female	wAlbB	23-33C	Positive	5.09824
Female	wAlbB	23-33C	Positive	6.02099
Female	wAlbB	23-33C	Positive	8.11168
Female	wAlbB	23-33C	Positive	7.21
Female	wAlbB	23-33C	Positive	3.86375
Female	wAlbB	23-33C	Positive	6.23332
Female	wAlbB	23-33C	Positive	16.1113
Female	wAlbB	23-33C	Positive	8.69388
Female	wAlbB	23-33C	Positive	7.88986
Female	wAlbB	23-33C	Positive	7.46426
Female	wMel	23-33C	Positive	1.54221
Female	wMel	23-33C	Positive	2.30537
Female	wMel	23-33C	Positive	0.564482
Female	wMel	23-33C	Positive	1.50525
Female	wMel	23-33C	Positive	2.37019
Female	wMel	23-33C	Positive	1.29684
Female	wMel	23-33C	Positive	1.64718
Female	wMel	23-33C	Positive	1.32256
Female	wMel	23-33C	Positive	2.09943
Female	wMel	23-33C	Positive	1.75321
Female	wMelPop	23-33C	Positive	128.296
Female	wMelPop	23-33C	Positive	253.645
Female	wMelPop	23-33C	Positive	487.751
Female	wMelPop	23-33C	Positive	308.687
Female	wMelPop	23-33C	Positive	202.718
Female	wMelPop	23-33C	Positive	155.417
Female	wMelPop	23-33C	Positive	188.054
Female	wMelPop	23-33C	Positive	181.438
Female	wMelPop	23-33C	Positive	71.1767
Female	wMelPop	23-33C	Positive	213.783
Female	wAlbB	26-36C	Positive	16.9123
Female	wAlbB	26-36C	Positive	6.72717
Female	wAlbB	26-36C	Positive	12.6407
Female	wAlbB	26-36C	Positive	17.5087
Female	wAlbB	26-36C	Positive	17.7531
Female	wAlbB	26-36C	Positive	19.9733
Female	wAlbB	26-36C	Positive	21.7057
Female	wAlbB	26-36C	Positive	16.3362
Female	wAlbB	26-36C	Positive	5.42642
Female	wAlbB	26-36C	Positive	22.1618
Female	wMel	26-36C	Positive	0.812252
Female	wMel	26-36C	Positive	0.80107
Female	wMel	26-36C	Positive	0.50581
Female	wMel	26-36C	Positive	2.9828
Female	wMel	26-36C	Positive	0.713672
Female	wMel	26-36C	Positive	1.51222
Female	wMel	26-36C	Positive	1.7211
Female	wMel	26-36C	Positive	0.443396
Female	wMel	26-36C	Positive	1.85746
Female	wMel	26-36C	Positive	0.479632
Female	wMelPop	26-36C	Positive	11.0809
Female	wMelPop	26-36C	Positive	25.1067
Female	wMelPop	26-36C	Positive	13.8326
Female	wMelPop	26-36C	Positive	25.4572
Female	wMelPop	26-36C	Positive	471.136
Female	wMelPop	26-36C	Positive	74.1993
Female	wMelPop	26-36C	Positive	26.9087
Female	wMelPop	26-36C	Positive	430.539
Female	wMelPop	26-36C	Positive	12.295
Female	wAlbB	26C	Positive	17.1484
Female	wAlbB	26C	Positive	11.7127
Female	wAlbB	26C	Positive	7.88986
Female	wAlbB	26C	Positive	17.7531
Female	wAlbB	26C	Positive	6.9644
Female	wAlbB	26C	Positive	19.1597
Female	wAlbB	26C	Positive	19.8353
Female	wAlbB	26C	Positive	6.1475
Female	wAlbB	26C	Positive	17.7531
Female	wAlbB	26C	Positive	9.98664
Female	wMel	26C	Positive	0.262429
Female	wMel	26C	Positive	2.02792
Female	wMel	26C	Positive	1.07674
Female	wMel	26C	Positive	1.6245
Female	wMel	26C	Positive	0.303549
Female	wMel	26C	Positive	1.51222
Female	wMel	26C	Positive	2.91467
Female	wMel	26C	Positive	0.283221
Female	wMel	26C	Positive	1.10957
Female	wMel	26C	Positive	1.55114
Female	wMelPop	26C	Positive	78.249
Female	wMelPop	26C	Positive	1.3566
Female	wMelPop	26C	Positive	125.656
Female	wMelPop	26C	Positive	517.949
Female	wMelPop	26C	Positive	104.691
Female	wMelPop	26C	Positive	163.144
Female	wMelPop	26C	Positive	19.8353
Female	wMelPop	26C	Positive	38.3193
Female	wMelPop	26C	Positive	415.873
Female	wAlbB	29-39C	Positive	4.78991
Female	wAlbB	29-39C	Positive	5.27803
Female	wAlbB	29-39C	Positive	2.60268
Female	wAlbB	29-39C	Positive	3.73213
Female	wAlbB	29-39C	Positive	3.03143
Female	wAlbB	29-39C	Positive	7.94474
Female	wAlbB	29-39C	Positive	7.4127
Female	wAlbB	29-39C	Positive	7.88986
Female	wAlbB	29-39C	Positive	1.67018
Female	wAlbB	29-39C	Positive	14.42
Female	wMel	29-39C	Positive	0.00331525
Female	wMel	29-39C	Positive	0.00444582
Female	wMel	29-39C	Positive	0.00218725
Female	wMel	29-39C	Positive	0.0402928
Female	wMel	29-39C	Positive	0.00173201
Female	wMel	29-39C	Positive	0.0962769
Female	wMel	29-39C	Positive	0.00401607
Female	wMel	29-39C	Positive	0.0107216
Female	wMel	29-39C	Positive	0.134592
Female	wMel	29-39C	Positive	0.00633108
Female	wMelPop	29-39C	Positive	0.000648772
Female	wMelPop	29-39C	Positive	0.184284
Female	wMelPop	29-39C	Positive	0.0213444
Female	wAlbB	8-18C	Positive	5.57897
Female	wAlbB	8-18C	Positive	12.4666
Female	wAlbB	8-18C	Positive	19.9733
Female	wAlbB	8-18C	Positive	9.64646
Female	wAlbB	8-18C	Positive	26.1729
Female	wAlbB	8-18C	Positive	14.3204
Female	wAlbB	8-18C	Positive	9.71356
Female	wAlbB	8-18C	Positive	9.06307
Female	wAlbB	8-18C	Positive	4.19887
Female	wAlbB	8-18C	Positive	16.1113
Female	wMel	8-18C	Positive	2.86791
Female	wMel	8-18C	Positive	3.65533
Female	wMel	8-18C	Positive	2.47942
Female	wMel	8-18C	Positive	5.31474
Female	wMel	8-18C	Positive	5.38893
Female	wMel	8-18C	Positive	2.21914
Female	wMel	8-18C	Positive	2.78949
Female	wMel	8-18C	Positive	3.65533
Female	wMel	8-18C	Positive	4.85678
Female	wMel	8-18C	Positive	4.40762
Female	wMelPop	8-18C	Positive	92.4115
Female	wMelPop	8-18C	Positive	58.0812
Female	wMelPop	8-18C	Positive	88.0347
Female	wMelPop	8-18C	Positive	82.1393
Female	wMelPop	8-18C	Positive	182.278
Female	wMelPop	8-18C	Positive	22.9433
Female	wMelPop	8-18C	Positive	12.1257
Male	wAlbB	11-21C	Positive	2.73208
Male	wAlbB	11-21C	Positive	1.21419
Male	wAlbB	11-21C	Positive	20.5348
Male	wAlbB	11-21C	Positive	9.98664
Male	wAlbB	11-21C	Positive	7.01285
Male	wAlbB	11-21C	Positive	5.35171
Male	wAlbB	11-21C	Positive	24.0839
Male	wAlbB	11-21C	Positive	7.78124
Male	wAlbB	11-21C	Positive	23.2636
Male	wAlbB	11-21C	Positive	1.65864
Male	wMel	11-21C	Positive	2.07053
Male	wMel	11-21C	Positive	2.78305
Male	wMel	11-21C	Positive	1.01045
Male	wMel	11-21C	Positive	1.66632
Male	wMel	11-21C	Positive	1.04972
Male	wMel	11-21C	Positive	0.687771
Male	wMel	11-21C	Positive	1.20025
Male	wMel	11-21C	Positive	2.30804
Male	wMel	11-21C	Positive	2.05623
Male	wMel	11-21C	Positive	0.965936
Male	wMelPop	11-21C	Positive	25.1067
Male	wMelPop	11-21C	Positive	4.65893
Male	wMelPop	11-21C	Positive	0.332171
Male	wMelPop	11-21C	Positive	34.7755
Male	wMelPop	11-21C	Positive	60.5477
Male	wMelPop	11-21C	Positive	14.0257
Male	wMelPop	11-21C	Positive	38.3193
Male	wMelPop	11-21C	Positive	9.00047
Male	wMelPop	11-21C	Positive	58.4852
Male	wAlbB	14-24C	Positive	6.58873
Male	wAlbB	14-24C	Positive	2.02792
Male	wAlbB	14-24C	Positive	2.53151
Male	wAlbB	14-24C	Positive	13.0864
Male	wAlbB	14-24C	Positive	14.9285
Male	wAlbB	14-24C	Positive	3.83706
Male	wAlbB	14-24C	Positive	21.8566
Male	wAlbB	14-24C	Positive	15.7797
Male	wAlbB	14-24C	Positive	8
Male	wAlbB	14-24C	Positive	10.4831
Male	wMel	14-24C	Positive	1.55833
Male	wMel	14-24C	Positive	4.3269
Male	wMel	14-24C	Positive	1.43065
Male	wMel	14-24C	Positive	1.28343
Male	wMel	14-24C	Positive	0.535887
Male	wMel	14-24C	Positive	1.72508
Male	wMel	14-24C	Positive	1.10957
Male	wMel	14-24C	Positive	2.83497
Male	wMel	14-24C	Positive	1.91853
Male	wMel	14-24C	Positive	2.75745
Male	wMelPop	14-24C	Positive	17.1484
Male	wMelPop	14-24C	Positive	143.013
Male	wMelPop	14-24C	Positive	59.7141
Male	wMelPop	14-24C	Positive	29.6508
Male	wMelPop	14-24C	Positive	512
Male	wMelPop	14-24C	Positive	8.11168
Male	wMelPop	14-24C	Positive	19.1597
Male	wMelPop	14-24C	Positive	48.5029
Male	wMelPop	14-24C	Positive	149.086
Male	wMelPop	14-24C	Positive	67.1819
Male	wAlbB	17-27C	Positive	4.43828
Male	wAlbB	17-27C	Positive	3.605
Male	wAlbB	17-27C	Positive	3.31728
Male	wAlbB	17-27C	Positive	2.05623
Male	wAlbB	17-27C	Positive	12.3805
Male	wAlbB	17-27C	Positive	6.58873
Male	wAlbB	17-27C	Positive	7.6211
Male	wAlbB	17-27C	Positive	6.45313
Male	wAlbB	17-27C	Positive	11.5514
Male	wAlbB	17-27C	Positive	15.7797
Male	wMel	17-27C	Positive	1.07425
Male	wMel	17-27C	Positive	0.710382
Male	wMel	17-27C	Positive	0.90125
Male	wMel	17-27C	Positive	2.81539
Male	wMel	17-27C	Positive	0.773782
Male	wMel	17-27C	Positive	1.10957
Male	wMel	17-27C	Positive	1.38831
Male	wMel	17-27C	Positive	3.71922
Male	wMel	17-27C	Positive	1.87905
Male	wMel	17-27C	Positive	1.02811
Male	wMelPop	17-27C	Positive	50.5626
Male	wMelPop	17-27C	Positive	304.437
Male	wMelPop	17-27C	Positive	207.937
Male	wMelPop	17-27C	Positive	266.871
Male	wMelPop	17-27C	Positive	88.0347
Male	wMelPop	17-27C	Positive	125.366
Male	wMelPop	17-27C	Positive	56.8859
Male	wMelPop	17-27C	Positive	12.042
Male	wMelPop	17-27C	Positive	22.1618
Male	wMelPop	17-27C	Positive	102.537
Male	wAlbB	20-30C	Positive	3.11511e-10
Male	wAlbB	20-30C	Positive	13.737
Male	wAlbB	20-30C	Positive	7.94474
Male	wAlbB	20-30C	Positive	8.69388
Male	wAlbB	20-30C	Positive	3.68075
Male	wAlbB	20-30C	Positive	9.84916
Male	wAlbB	20-30C	Positive	30.0647
Male	wAlbB	20-30C	Positive	7.21
Male	wAlbB	20-30C	Positive	12.042
Male	wAlbB	20-30C	Positive	6.63456
Male	wMel	20-30C	Positive	1.35347
Male	wMel	20-30C	Positive	3.77114
Male	wMel	20-30C	Positive	5.26585
Male	wMel	20-30C	Positive	2.91467
Male	wMel	20-30C	Positive	0.776469
Male	wMel	20-30C	Positive	0.734584
Male	wMel	20-30C	Positive	1.67018
Male	wMel	20-30C	Positive	1.6245
Male	wMel	20-30C	Positive	1.74715
Male	wMel	20-30C	Positive	0.364334
Male	wMelPop	20-30C	Positive	42.8137
Male	wMelPop	20-30C	Positive	62.6829
Male	wMelPop	20-30C	Positive	150.123
Male	wMelPop	20-30C	Positive	115.36
Male	wMelPop	20-30C	Positive	14.42
Male	wMelPop	20-30C	Positive	53.8174
Male	wMelPop	20-30C	Positive	32
Male	wMelPop	20-30C	Positive	51.2685
Male	wMelPop	20-30C	Positive	32
Male	wMelPop	20-30C	Positive	30.0647
Male	wAlbB	23-33C	Positive	5.85634
Male	wAlbB	23-33C	Positive	6.23332
Male	wAlbB	23-33C	Positive	9.51366
Male	wAlbB	23-33C	Positive	10.8528
Male	wAlbB	23-33C	Positive	8.57419
Male	wAlbB	23-33C	Positive	5.61778
Male	wAlbB	23-33C	Positive	12.4666
Male	wAlbB	23-33C	Positive	11.2356
Male	wAlbB	23-33C	Positive	15.6707
Male	wAlbB	23-33C	Positive	7.94474
Male	wMel	23-33C	Positive	2.37019
Male	wMel	23-33C	Positive	1.58008
Male	wMel	23-33C	Positive	2.40327
Male	wMel	23-33C	Positive	3.65533
Male	wMel	23-33C	Positive	2.20381
Male	wMel	23-33C	Positive	3.20428
Male	wMel	23-33C	Positive	0.873573
Male	wMel	23-33C	Positive	0.011023
Male	wMel	23-33C	Positive	1.74917
Male	wMel	23-33C	Positive	1.90528
Male	wMelPop	23-33C	Positive	191.341
Male	wMelPop	23-33C	Positive	149.086
Male	wMelPop	23-33C	Positive	35.5062
Male	wMelPop	23-33C	Positive	116.162
Male	wMelPop	23-33C	Positive	354.588
Male	wMelPop	23-33C	Positive	337.794
Male	wMelPop	23-33C	Positive	36.5044
Male	wMelPop	23-33C	Positive	33.8246
Male	wMelPop	23-33C	Positive	22.1618
Male	wAlbB	26-36C	Positive	5.9794
Male	wAlbB	26-36C	Positive	1.76541
Male	wAlbB	26-36C	Positive	8.75435
Male	wAlbB	26-36C	Positive	20.6776
Male	wAlbB	26-36C	Positive	6.36429
Male	wAlbB	26-36C	Positive	5.24157
Male	wAlbB	26-36C	Positive	9.38268
Male	wAlbB	26-36C	Positive	8.51496
Male	wAlbB	26-36C	Positive	4.59479
Male	wAlbB	26-36C	Positive	16.6795
Male	wMel	26-36C	Positive	2.41999
Male	wMel	26-36C	Positive	1.21419
Male	wMel	26-36C	Positive	0.817902
Male	wMel	26-36C	Positive	1.3566
Male	wMel	26-36C	Positive	4.39237
Male	wMel	26-36C	Positive	1.40444
Male	wMel	26-36C	Positive	1.64718
Male	wMel	26-36C	Positive	0.936272
Male	wMel	26-36C	Positive	1.08298
Male	wMel	26-36C	Positive	1.69349
Male	wMelPop	26-36C	Positive	0.00866851
Male	wMelPop	26-36C	Positive	3.78423
Male	wMelPop	26-36C	Positive	37.2715
Male	wMelPop	26-36C	Positive	30.91
Male	wMelPop	26-36C	Positive	5.46416
Male	wMelPop	26-36C	Positive	16.2234
Male	wMelPop	26-36C	Positive	17.6305
Male	wMelPop	26-36C	Positive	31.5594
Male	wMelPop	26-36C	Positive	16.5642
Male	wMelPop	26-36C	Positive	15.2422
Male	wAlbB	26C	Positive	5.31474
Male	wAlbB	26C	Positive	3.68075
Male	wAlbB	26C	Positive	15.455
Male	wAlbB	26C	Positive	13.2691
Male	wAlbB	26C	Positive	21.259
Male	wAlbB	26C	Positive	23.5883
Male	wAlbB	26C	Positive	17.7531
Male	wAlbB	26C	Positive	11.4716
Male	wAlbB	26C	Positive	12.9063
Male	wAlbB	26C	Positive	10.4107
Male	wMel	26C	Positive	1.31039
Male	wMel	26C	Positive	4.50023
Male	wMel	26C	Positive	1.55294
Male	wMel	26C	Positive	1.79626
Male	wMel	26C	Positive	1.95206
Male	wMel	26C	Positive	2.0209
Male	wMel	26C	Positive	1.21841
Male	wMel	26C	Positive	2.61172
Male	wMel	26C	Positive	2.15846
Male	wMel	26C	Positive	2.50533
Male	wMelPop	26C	Positive	84.4485
Male	wMelPop	26C	Positive	19.8353
Male	wMelPop	26C	Positive	23.1029
Male	wMelPop	26C	Positive	35.5062
Male	wMelPop	26C	Positive	3.18215
Male	wMelPop	26C	Positive	0.554785
Male	wMelPop	26C	Positive	38.0546
Male	wMelPop	26C	Positive	27.0958
Male	wMelPop	26C	Positive	33.5909
Male	wMelPop	26C	Positive	0.0486978
Male	wAlbB	29-39C	Positive	5.50217
Male	wAlbB	29-39C	Positive	7.83536
Male	wAlbB	29-39C	Positive	2.56685
Male	wAlbB	29-39C	Positive	11.0809
Male	wAlbB	29-39C	Positive	7.11074
Male	wAlbB	29-39C	Positive	2
Male	wAlbB	29-39C	Positive	6.23332
Male	wAlbB	29-39C	Positive	2.53151
Male	wAlbB	29-39C	Positive	1.21419
Male	wMel	29-39C	Positive	0.00193292
Male	wMel	29-39C	Positive	0.00562083
Male	wMel	29-39C	Positive	0.00229865
Male	wMel	29-39C	Positive	0.00256825
Male	wMel	29-39C	Positive	0.0013433
Male	wMel	29-39C	Positive	0.0114382
Male	wMel	29-39C	Positive	0.00372124
Male	wMel	29-39C	Positive	0.00321715
Male	wMel	29-39C	Positive	0.00211519
Male	wMel	29-39C	Positive	0.00417213
Male	wMelPop	29-39C	Negative
Male	wMelPop	29-39C	Negative
Male	wMelPop	29-39C	Negative
Male	wMelPop	29-39C	Negative
Male	wMelPop	29-39C	Negative
Male	wMelPop	29-39C	Negative
Male	wAlbB	8-18C	Positive	15.3482
Male	wAlbB	8-18C	Positive	5.54044
Male	wAlbB	8-18C	Positive	7.21
Male	wAlbB	8-18C	Positive	10.6295
Male	wAlbB	8-18C	Positive	9.84916
Male	wAlbB	8-18C	Positive	0.972655
Male	wAlbB	8-18C	Positive	9.38268
Male	wAlbB	8-18C	Positive	15.0324
Male	wAlbB	8-18C	Positive	4.89056
Male	wAlbB	8-18C	Positive	2.01391
Male	wMel	8-18C	Positive	2.6087
Male	wMel	8-18C	Positive	0.532185
Male	wMel	8-18C	Positive	2.59068
Male	wMel	8-18C	Positive	1.65864
Male	wMel	8-18C	Positive	1.25411
Male	wMel	8-18C	Positive	3.03143
Male	wMel	8-18C	Positive	1.06069
Male	wMel	8-18C	Positive	3.63008
Male	wMel	8-18C	Positive	1.28343
Male	wMel	8-18C	Positive	2.39496
Male	wMelPop	8-18C	Positive	1176.27
Male	wMelPop	8-18C	Positive	47.8352
Male	wMelPop	8-18C	Positive	108.383
Male	wMelPop	8-18C	Positive	7.06162
Male	wMelPop	8-18C	Positive	41.6429
Male	wMelPop	8-18C	Positive	145.009
Male	wMelPop	8-18C	Positive	49.18
Male	wMelPop	8-18C	Positive	22.0087
Male	wMelPop	8-18C	Positive	11.9588

## Sheet: Figure 7A
Temperature cycle	Strain	Hatch proportion
26C	Uninfected	0.821429
26C	Uninfected	0.842105
26C	Uninfected	0.777778
26C	Uninfected	0.904762
26C	Uninfected	0.931034
26C	Uninfected	0.958333
26C	Uninfected	0.882353
26C	Uninfected	0.56
26C	Uninfected	0.952381
26C	Uninfected	0.8
26C	Uninfected	1
26C	Uninfected	0.85
26C	wAlbB	0.964286
26C	wAlbB	0.73913
26C	wAlbB	0.869565
26C	wAlbB	0.724138
26C	wAlbB	0.736842
26C	wAlbB	0.904762
26C	wAlbB	0.875
26C	wAlbB	0.818182
26C	wAlbB	0.956522
26C	wAlbB	0.92
26C	wAlbB	0.95
26C	wAlbB	0.846154
26C	wMel	0.904762
26C	wMel	0.956522
26C	wMel	1
26C	wMel	0.941176
26C	wMel	0.909091
26C	wMel	0.947368
26C	wMel	0.85
26C	wMel	0.952381
26C	wMel	0.909091
26C	wMel	0.9
26C	wMel	0.88
26C	wMel	0.869565
26C	wMelPop	0.526316
26C	wMelPop	0.823529
26C	wMelPop	0.555556
26C	wMelPop	0.894737
26C	wMelPop	0.388889
26C	wMelPop	0.56
26C	wMelPop	0.588235
26C	wMelPop	0.76
26C	wMelPop	0.25
26C	wMelPop	0.904762
26C	wMelPop	0.818182
26C	wMelPop	0.6
24-34C	Uninfected	0.92
24-34C	Uninfected	0.941176
24-34C	Uninfected	0.956522
24-34C	Uninfected	0.972222
24-34C	Uninfected	0.96
24-34C	Uninfected	0.941176
24-34C	Uninfected	0.692308
24-34C	Uninfected	0.8
24-34C	Uninfected	0.842105
24-34C	Uninfected	1
24-34C	Uninfected	0.684211
24-34C	Uninfected	0.73913
24-34C	wAlbB	0.916667
24-34C	wAlbB	0.766667
24-34C	wAlbB	0.842105
24-34C	wAlbB	0.833333
24-34C	wAlbB	0.884615
24-34C	wAlbB	0.5
24-34C	wAlbB	0.909091
24-34C	wAlbB	0.782609
24-34C	wAlbB	0.9
24-34C	wAlbB	0.909091
24-34C	wAlbB	0.764706
24-34C	wAlbB	0.541667
24-34C	wMel	0.8125
24-34C	wMel	0.724138
24-34C	wMel	0.791667
24-34C	wMel	0.96875
24-34C	wMel	0.666667
24-34C	wMel	0.666667
24-34C	wMel	0.809524
24-34C	wMel	0.862069
24-34C	wMel	0.928571
24-34C	wMel	0.896552
24-34C	wMel	0.869565
24-34C	wMel	0.772727
24-34C	wMelPop	0.32
24-34C	wMelPop	0.285714
24-34C	wMelPop	0.36
24-34C	wMelPop	0.318182
24-34C	wMelPop	0.433333
24-34C	wMelPop	0.354839
24-34C	wMelPop	0.55
24-34C	wMelPop	0.428571
24-34C	wMelPop	0.461538
24-34C	wMelPop	0.631579
24-34C	wMelPop	0.357143
24-34C	wMelPop	0.4
25-35C	Uninfected	0.913043
25-35C	Uninfected	0.785714
25-35C	Uninfected	0.772727
25-35C	Uninfected	0.88
25-35C	Uninfected	0.727273
25-35C	Uninfected	0.913043
25-35C	Uninfected	0.884615
25-35C	Uninfected	0.916667
25-35C	Uninfected	0.894737
25-35C	Uninfected	0.913043
25-35C	Uninfected	0.863636
25-35C	Uninfected	0.8
25-35C	wAlbB	0.833333
25-35C	wAlbB	0.709677
25-35C	wAlbB	0.736842
25-35C	wAlbB	0.709677
25-35C	wAlbB	0.894737
25-35C	wAlbB	0.290323
25-35C	wAlbB	0.814815
25-35C	wAlbB	0.68
25-35C	wAlbB	1
25-35C	wAlbB	0.863636
25-35C	wAlbB	0.928571
25-35C	wAlbB	0.73913
25-35C	wMel	0.826087
25-35C	wMel	0.965517
25-35C	wMel	0.742857
25-35C	wMel	0.68
25-35C	wMel	0.5
25-35C	wMel	0.939394
25-35C	wMel	0.666667
25-35C	wMel	0.947368
25-35C	wMel	0.821429
25-35C	wMel	0.714286
25-35C	wMel	0.791667
25-35C	wMel	0.772727
25-35C	wMelPop	0.3
25-35C	wMelPop	0.181818
25-35C	wMelPop	0.517241
25-35C	wMelPop	0.15625
25-35C	wMelPop	0.210526
25-35C	wMelPop	0.176471
25-35C	wMelPop	0.272727
25-35C	wMelPop	0.3
25-35C	wMelPop	0.173913
25-35C	wMelPop	0.391304
25-35C	wMelPop	0.222222
25-35C	wMelPop	0.166667
26-36C	Uninfected	0.818182
26-36C	Uninfected	0.758621
26-36C	Uninfected	0.782609
26-36C	Uninfected	0.72
26-36C	Uninfected	0.75
26-36C	Uninfected	0.769231
26-36C	Uninfected	0.941176
26-36C	Uninfected	0.842105
26-36C	Uninfected	0.857143
26-36C	Uninfected	0.809524
26-36C	Uninfected	0.529412
26-36C	Uninfected	0.631579
26-36C	wAlbB	0.615385
26-36C	wAlbB	0.545455
26-36C	wAlbB	0.8
26-36C	wAlbB	0.607143
26-36C	wAlbB	0.655172
26-36C	wAlbB	0.678571
26-36C	wAlbB	0.909091
26-36C	wAlbB	0.962963
26-36C	wAlbB	0.888889
26-36C	wAlbB	0.875
26-36C	wAlbB	0.884615
26-36C	wAlbB	0.8
26-36C	wMel	0.586207
26-36C	wMel	0.777778
26-36C	wMel	0.684211
26-36C	wMel	0.827586
26-36C	wMel	0.764706
26-36C	wMel	0.631579
26-36C	wMel	0.866667
26-36C	wMel	0.636364
26-36C	wMel	0.75
26-36C	wMel	0.952381
26-36C	wMel	0.555556
26-36C	wMel	1
26-36C	wMelPop	0.230769
26-36C	wMelPop	0.275862
26-36C	wMelPop	0.241379
26-36C	wMelPop	0.193548
26-36C	wMelPop	0.2
26-36C	wMelPop	0.0740741
26-36C	wMelPop	0.25
26-36C	wMelPop	0.16
26-36C	wMelPop	0.0833333
26-36C	wMelPop	0.181818
26-36C	wMelPop	0.0952381
26-36C	wMelPop	0.25
27-37C	Uninfected	0.571429
27-37C	Uninfected	0.73913
27-37C	Uninfected	0.666667
27-37C	Uninfected	0.818182
27-37C	Uninfected	0.68
27-37C	Uninfected	0.809524
27-37C	Uninfected	0.904762
27-37C	Uninfected	0.894737
27-37C	Uninfected	0.909091
27-37C	Uninfected	0.434783
27-37C	Uninfected	0.631579
27-37C	Uninfected	0.714286
27-37C	wAlbB	0.78125
27-37C	wAlbB	0.75
27-37C	wAlbB	0.818182
27-37C	wAlbB	0.676471
27-37C	wAlbB	0.5
27-37C	wAlbB	0.653846
27-37C	wAlbB	0.904762
27-37C	wAlbB	0.608696
27-37C	wAlbB	0.896552
27-37C	wAlbB	0.676471
27-37C	wAlbB	0.793103
27-37C	wAlbB	0.56
27-37C	wMel	0.777778
27-37C	wMel	0.642857
27-37C	wMel	0.8
27-37C	wMel	0.782609
27-37C	wMel	0.863636
27-37C	wMel	0.653846
27-37C	wMel	0.875
27-37C	wMel	0.909091
27-37C	wMel	0.733333
27-37C	wMel	0.909091
27-37C	wMel	0.73913
27-37C	wMel	0.695652
27-37C	wMelPop	0.0434783
27-37C	wMelPop	0.193548
27-37C	wMelPop	0.291667
27-37C	wMelPop	0.263158
27-37C	wMelPop	0.0740741
27-37C	wMelPop	0.0416667
27-37C	wMelPop	0.0666667
27-37C	wMelPop	0
27-37C	wMelPop	0.181818
27-37C	wMelPop	0.26087
27-37C	wMelPop	0.0869565
27-37C	wMelPop	0.230769
28-38C	Uninfected	0.73913
28-38C	Uninfected	0.6
28-38C	Uninfected	0.826087
28-38C	Uninfected	1
28-38C	Uninfected	0.8
28-38C	Uninfected	0.7
28-38C	Uninfected	0.842105
28-38C	Uninfected	0.684211
28-38C	Uninfected	0.826087
28-38C	Uninfected	0.888889
28-38C	Uninfected	0.740741
28-38C	Uninfected	0.724138
28-38C	wAlbB	0.676471
28-38C	wAlbB	0.545455
28-38C	wAlbB	0.6875
28-38C	wAlbB	0.65625
28-38C	wAlbB	0.64
28-38C	wAlbB	0.387097
28-38C	wAlbB	0.782609
28-38C	wAlbB	0.692308
28-38C	wAlbB	0.681818
28-38C	wAlbB	0.384615
28-38C	wAlbB	0.619048
28-38C	wAlbB	0.793103
28-38C	wMel	0.521739
28-38C	wMel	0.586207
28-38C	wMel	0.541667
28-38C	wMel	0.515152
28-38C	wMel	0
28-38C	wMel	0.565217
28-38C	wMel	0.409091
28-38C	wMel	0.619048
28-38C	wMel	0.227273
28-38C	wMel	0.65
28-38C	wMel	0.703704
28-38C	wMel	0.47619
28-38C	wMelPop	0.269231
28-38C	wMelPop	0.16
28-38C	wMelPop	0.269231
28-38C	wMelPop	0.130435
28-38C	wMelPop	0.0909091
28-38C	wMelPop	0.0869565
28-38C	wMelPop	0.0909091
28-38C	wMelPop	0.0909091
28-38C	wMelPop	0.0526316
28-38C	wMelPop	0.2
28-38C	wMelPop	0.0384615
28-38C	wMelPop	0.1
29-39C	Uninfected	0.541667
29-39C	Uninfected	0.7
29-39C	Uninfected	0.5
29-39C	Uninfected	0.64
29-39C	Uninfected	0.681818
29-39C	Uninfected	0.541667
29-39C	Uninfected	0.73913
29-39C	Uninfected	0.777778
29-39C	Uninfected	0.583333
29-39C	Uninfected	0.642857
29-39C	Uninfected	0.391304
29-39C	Uninfected	0.64
29-39C	wAlbB	0.133333
29-39C	wAlbB	0.25
29-39C	wAlbB	0.318182
29-39C	wAlbB	0.380952
29-39C	wAlbB	0.25
29-39C	wAlbB	0.521739
29-39C	wAlbB	0.727273
29-39C	wAlbB	0.516129
29-39C	wAlbB	0.0434783
29-39C	wAlbB	0.625
29-39C	wAlbB	0.652174
29-39C	wAlbB	0.55
29-39C	wMel	0.354839
29-39C	wMel	0.517241
29-39C	wMel	0.230769
29-39C	wMel	0.514286
29-39C	wMel	0.580645
29-39C	wMel	0.685714
29-39C	wMel	0.173913
29-39C	wMel	0.580645
29-39C	wMel	0.652174
29-39C	wMel	0.136364
29-39C	wMel	0.291667
29-39C	wMel	0.181818
29-39C	wMelPop	0.133333
29-39C	wMelPop	0.08
29-39C	wMelPop	0.166667
29-39C	wMelPop	0
29-39C	wMelPop	0.28
29-39C	wMelPop	0.05
29-39C	wMelPop	0.315789
29-39C	wMelPop	0.0769231
29-39C	wMelPop	0.166667
29-39C	wMelPop	0.125
29-39C	wMelPop	0
29-39C	wMelPop	0
30-40C	Uninfected	0
30-40C	Uninfected	0.25
30-40C	Uninfected	0.382353
30-40C	Uninfected	0.357143
30-40C	Uninfected	0.458333
30-40C	Uninfected	0.3
30-40C	Uninfected	0.695652
30-40C	Uninfected	0.6
30-40C	Uninfected	0.777778
30-40C	Uninfected	0.75
30-40C	Uninfected	0.666667
30-40C	Uninfected	0.684211
30-40C	wAlbB	0.3125
30-40C	wAlbB	0.15
30-40C	wAlbB	0.269231
30-40C	wAlbB	0
30-40C	wAlbB	0.157895
30-40C	wAlbB	0.111111
30-40C	wAlbB	0.483871
30-40C	wAlbB	0.272727
30-40C	wAlbB	0.4
30-40C	wAlbB	0.366667
30-40C	wAlbB	0.619048
30-40C	wAlbB	0
30-40C	wMel	0
30-40C	wMel	0.105263
30-40C	wMel	0.0689655
30-40C	wMel	0.233333
30-40C	wMel	0.0833333
30-40C	wMel	0.172414
30-40C	wMel	0.0416667
30-40C	wMel	0.111111
30-40C	wMel	0
30-40C	wMel	0
30-40C	wMel	0.04
30-40C	wMel	0
30-40C	wMelPop	0
30-40C	wMelPop	0.0714286
30-40C	wMelPop	0.12
30-40C	wMelPop	0.0416667
30-40C	wMelPop	0.0434783
30-40C	wMelPop	0.0833333
30-40C	wMelPop	0
30-40C	wMelPop	0.0357143
30-40C	wMelPop	0.111111
30-40C	wMelPop	0.0952381
30-40C	wMelPop	0
30-40C	wMelPop	0
31-41C	Uninfected	0.347826
31-41C	Uninfected	0.0416667
31-41C	Uninfected	0.037037
31-41C	Uninfected	0.03125
31-41C	Uninfected	0.08
31-41C	Uninfected	0
31-41C	Uninfected	0.0689655
31-41C	Uninfected	0
31-41C	Uninfected	0.0357143
31-41C	Uninfected	0.047619
31-41C	Uninfected	0.0689655
31-41C	Uninfected	0
31-41C	wAlbB	0
31-41C	wAlbB	0
31-41C	wAlbB	0
31-41C	wAlbB	0
31-41C	wAlbB	0
31-41C	wAlbB	0
31-41C	wAlbB	0
31-41C	wAlbB	0.03125
31-41C	wAlbB	0
31-41C	wAlbB	0
31-41C	wAlbB	0
31-41C	wAlbB	0.0333333
31-41C	wMel	0
31-41C	wMel	0
31-41C	wMel	0
31-41C	wMel	0
31-41C	wMel	0
31-41C	wMel	0.0333333
31-41C	wMel	0
31-41C	wMel	0
31-41C	wMel	0
31-41C	wMel	0
31-41C	wMel	0
31-41C	wMel	0
31-41C	wMelPop	0
31-41C	wMelPop	0
31-41C	wMelPop	0
31-41C	wMelPop	0.04
31-41C	wMelPop	0
31-41C	wMelPop	0
31-41C	wMelPop	0
31-41C	wMelPop	0
31-41C	wMelPop	0
31-41C	wMelPop	0
31-41C	wMelPop	0
31-41C	wMelPop	0
32-42C	Uninfected	0.04
32-42C	Uninfected	0.4
32-42C	Uninfected	0
32-42C	Uninfected	0
32-42C	Uninfected	0
32-42C	Uninfected	0
32-42C	Uninfected	0
32-42C	Uninfected	0
32-42C	Uninfected	0
32-42C	Uninfected	0
32-42C	Uninfected	0
32-42C	Uninfected	0
32-42C	wAlbB	0
32-42C	wAlbB	0
32-42C	wAlbB	0
32-42C	wAlbB	0
32-42C	wAlbB	0
32-42C	wAlbB	0
32-42C	wAlbB	0
32-42C	wAlbB	0
32-42C	wAlbB	0
32-42C	wAlbB	0
32-42C	wAlbB	0
32-42C	wAlbB	0
32-42C	wMel	0
32-42C	wMel	0
32-42C	wMel	0
32-42C	wMel	0
32-42C	wMel	0
32-42C	wMel	0
32-42C	wMel	0
32-42C	wMel	0
32-42C	wMel	0
32-42C	wMel	0
32-42C	wMel	0
32-42C	wMel	0
32-42C	wMelPop	0
32-42C	wMelPop	0.0454545
32-42C	wMelPop	0
32-42C	wMelPop	0
32-42C	wMelPop	0
32-42C	wMelPop	0
32-42C	wMelPop	0
32-42C	wMelPop	0
32-42C	wMelPop	0
32-42C	wMelPop	0
32-42C	wMelPop	0
32-42C	wMelPop	0

[truncated: 1 more sheets: Figure 7B-C]
